# Supplementary material for: Genome-wide DNA methylation analysis during non-alcoholic steatohepatitis-related multistage hepatocarcinogenesis: comparison with hepatitis virus-related carcinogenesis
Source: PubMed Central journal article supplement — Carcinogenesis. 2017 Jan 25;38(3):261–70. doi: 10.1093/carcin/bgx005 (PMC5862314; doi:10.1093/carcin/bgx005), 2017-01-25
Supplement: bgx005_suppl_kuramoto_supplementary_figure_s3_revised.pdf [file bgx005_suppl_kuramoto_supplementary_figure_s3_revised.pdf]

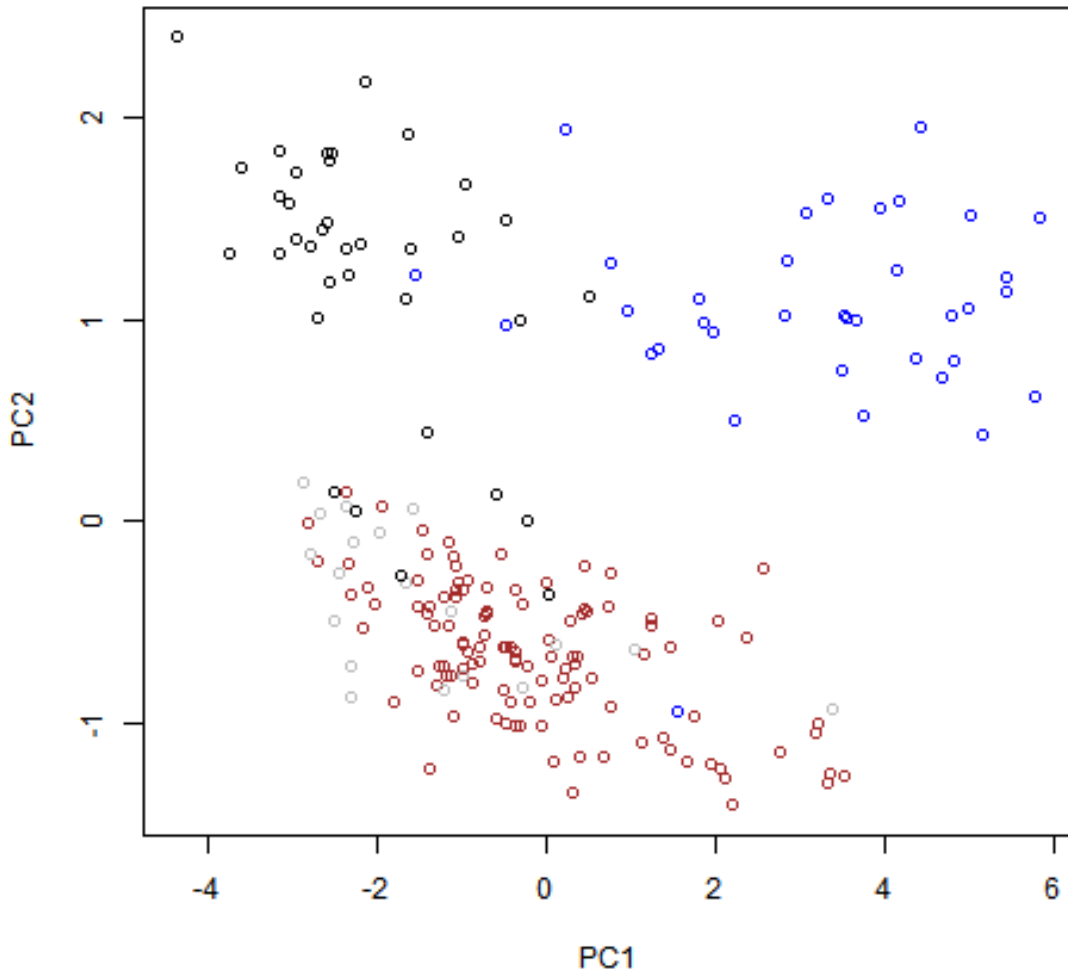

**Supplementary Figure S3** DNA methylation profiles of 19 samples of normal liver tissue (NLT) with morbid obesity (gray circles), 36 samples of NLT with liver metastases of colorectal cancer (black circles), 113 samples of non-cancerous liver tissue showing non-alcoholic steatohepatitis (NASH-N) (red circles), and 37 samples of non-cancerous liver tissue showing chronic hepatitis or cirrhosis associated with hepatitis B virus or hepatitis C virus infection (blue circles). Principal component analysis using the 3,331 probes (same as Figure 2) revealed that the DNA methylation profiles of NLTs with morbid obesity were more similar to those of NASH-N samples in comparison with NLTs with liver metastases.
