# Supplementary material for: Genome-wide DNA methylation analysis during non-alcoholic steatohepatitis-related multistage hepatocarcinogenesis: comparison with hepatitis virus-related carcinogenesis
Source: PubMed Central journal article supplement — Carcinogenesis. 2017 Jan 25;38(3):261–70. doi: 10.1093/carcin/bgx005 (PMC5862314; doi:10.1093/carcin/bgx005), 2017-01-25
Supplement: bgx005_suppl_kuramoto_supplementary_figure_s4_revised.pdf [file bgx005_suppl_kuramoto_supplementary_figure_s4_revised.pdf]

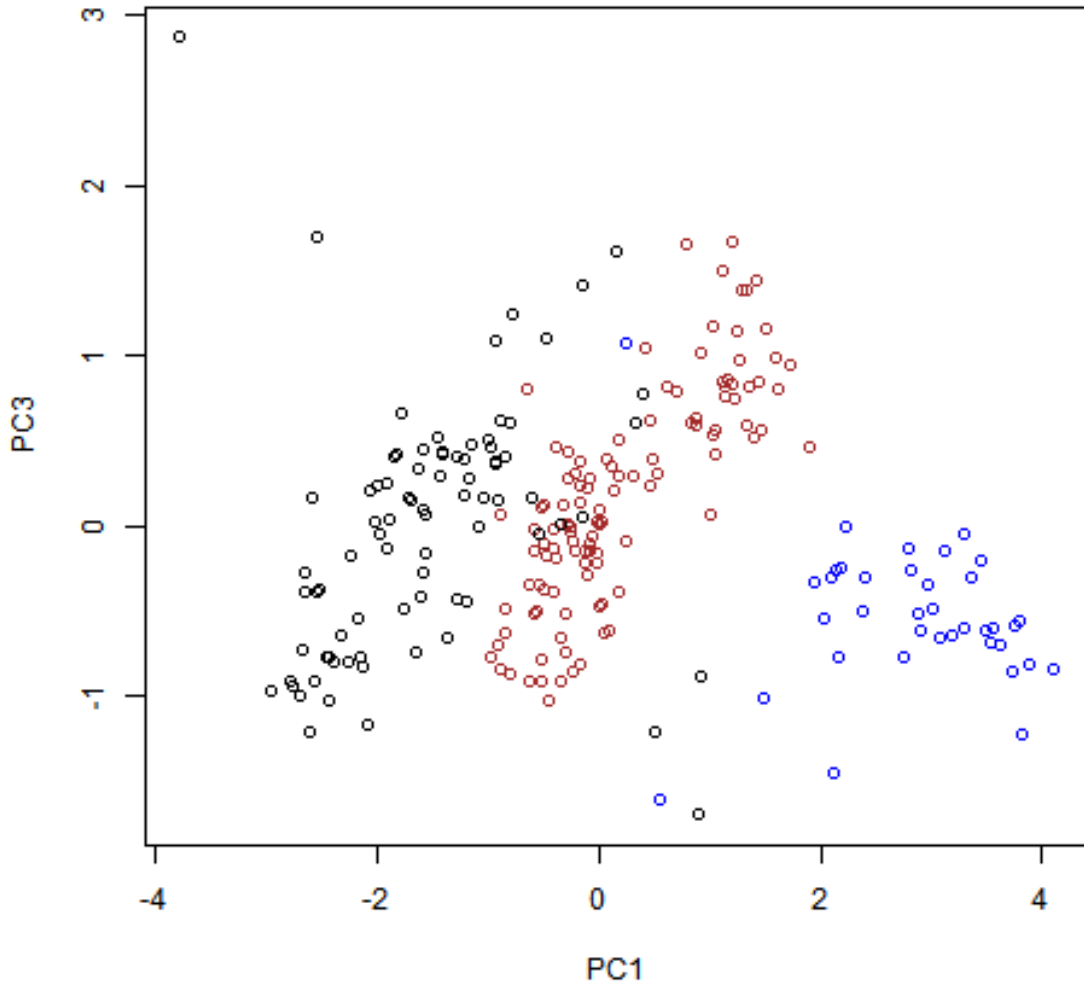

**Supplementary Figure S4** DNA methylation profiles of 82 samples of adult control normal liver tissue from two data sets deposited in the GEO database (<https://www.ncbi.nlm.nih.gov/geo/>) (GSE61258 and GSE69852) (black circles), 113 samples of non-cancerous liver tissue showing non-alcoholic steatohepatitis (NASH-N) (red circles), and 37 samples of non-cancerous liver tissue showing chronic hepatitis or cirrhosis associated with hepatitis virus infection (viral-N) (blue circles). Principal component analysis using the 9,150 probes showed that the DNA methylation profiles of NASH-N samples differed distinctly from those of both control normal liver tissue samples from the public database and viral-N samples.
