# Supplementary material for: Genome-wide DNA methylation analysis during non-alcoholic steatohepatitis-related multistage hepatocarcinogenesis: comparison with hepatitis virus-related carcinogenesis
Source: PubMed Central journal article supplement — Carcinogenesis. 2017 Jan 25;38(3):261–70. doi: 10.1093/carcin/bgx005 (PMC5862314; doi:10.1093/carcin/bgx005), 2017-01-25
Supplement: bgx005_suppl_kuramoto_supplementary_figure_s5_revised.pdf [file bgx005_suppl_kuramoto_supplementary_figure_s5_revised.pdf]

NLT  $\neq$  NASH-N (Welch's  $t$  test, adjusted Bonferroni correction [ $\alpha = 1.12 \times 10^{-7}$ ] and a  $\Delta\beta_{\text{NASH-N} - \text{NLT}}$  value of more than 0.05 or less than -0.05)

NASH-N  $\neq$  viral-N (Welch's  $t$  test, adjusted by Bonferroni correction [ $\alpha = 1.12 \times 10^{-7}$ ] and a  $\Delta\beta_{\text{NASH-N} - \text{viral-N}}$  value of more than 0.05 or less than -0.05)

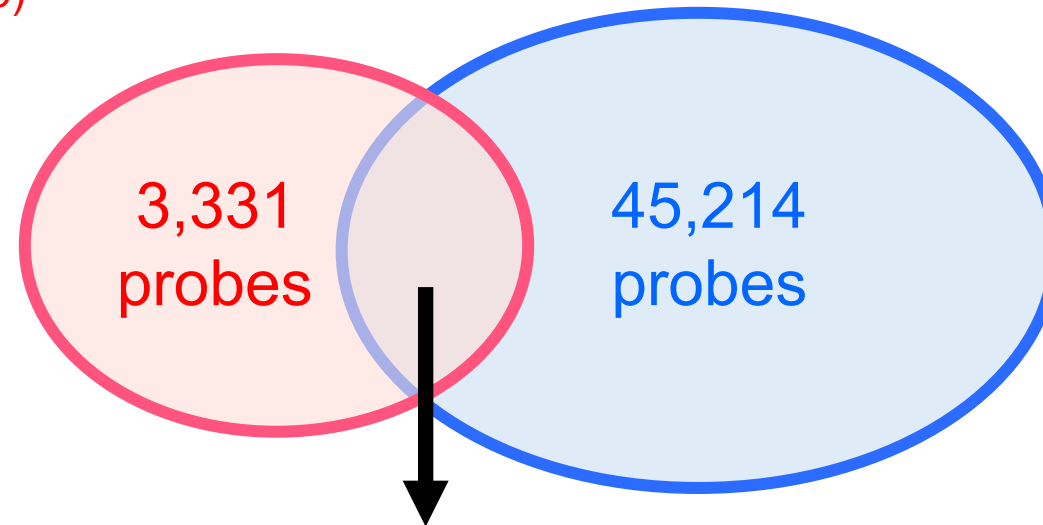

Any of the following three cases:

- (i) not showing significant differences in DNA methylation levels between the NLT and viral-N samples (NLT=viral-N),
- (ii) showing DNA hypermethylation in NASH-Ns and DNA hypomethylation in viral-Ns in comparison with NLT samples (NASH-N>NLT and viral-N<NLT),
- or (iii) showing DNA hypomethylation in NASH-Ns and DNA hypermethylation in viral-Ns in comparison with NLT samples (NASH-N<NLT and viral-N>NLT)

375 probes showing NASH-N specific DNA methylation alterations

**Supplementary Figure S5** Procedure for identification of the 375 probes showing NASH-N-specific DNA methylation alterations and summarized in Supplementary Table S4. NLT, normal liver tissue; NASH-N, non-cancerous liver tissue showing non-alcoholic steatohepatitis; viral-N, non-cancerous liver tissue showing chronic hepatitis or cirrhosis associated with hepatitis virus infection.
