# Supplementary material for: Genome-wide DNA methylation analysis during non-alcoholic steatohepatitis-related multistage hepatocarcinogenesis: comparison with hepatitis virus-related carcinogenesis
Source: PubMed Central journal article supplement — Carcinogenesis. 2017 Jan 25;38(3):261–70. doi: 10.1093/carcin/bgx005 (PMC5862314; doi:10.1093/carcin/bgx005), 2017-01-25
Supplement: bgx005_suppl_kuramoto_supplementary_table_s1_revised.pdf [file bgx005_suppl_kuramoto_supplementary_table_s1_revised.pdf]

Supplementary Table S1 Clinicopathological characteristics of patients.

## (A) Patients with non-alcoholic steatohepatitis (NASH)

| Clinicopathological parameters                 |                          | Patients age and the number of patients       |                                                                   |
|------------------------------------------------|--------------------------|-----------------------------------------------|-------------------------------------------------------------------|
|                                                |                          | whose liver biopsy specimens were used (n=91) | whose partial hepatectomy specimens were used (n=22) <sup>c</sup> |
| Age (years)                                    |                          | 42.49 ± 10.17                                 | 71.23 ± 7.65                                                      |
| Sex                                            | Male                     | 41                                            | 20                                                                |
|                                                | Female                   | 50                                            | 2                                                                 |
| Microscopic findings<br>Steatosis <sup>a</sup> | <5%                      | 3                                             | 0                                                                 |
|                                                | 5-33%                    | 55                                            | 15                                                                |
|                                                | 33-66%                   | 21                                            | 6                                                                 |
|                                                | >66%                     | 11                                            | 1                                                                 |
| Lobular inflammation <sup>a</sup>              | None                     | 1                                             | 0                                                                 |
|                                                | <2 foci per 200 x field  | 74                                            | 17                                                                |
|                                                | 2-4 foci per 200 x field | 16                                            | 5                                                                 |
|                                                | >4 foci per 200 x field  | 0                                             | 0                                                                 |
| Balloonin <sup>a</sup>                         | None                     | 1                                             | 0                                                                 |
|                                                | Few                      | 88                                            | 19                                                                |
|                                                | Many                     | 2                                             | 3                                                                 |
| Fibrosis <sup>b</sup>                          | 0                        | 3                                             | 0                                                                 |
|                                                | 1a                       | 43                                            | 5                                                                 |
|                                                | 1b                       | 6                                             | 0                                                                 |
|                                                | 1c                       | 0                                             | 0                                                                 |
|                                                | 2                        | 22                                            | 10                                                                |
|                                                | 3                        | 13                                            | 5                                                                 |
| NASH stage <sup>b</sup>                        | 4                        | 4                                             | 2                                                                 |
|                                                | Grade 1                  | 69                                            | 17                                                                |
|                                                | Grade 2                  | 18                                            | 4                                                                 |
|                                                | Grade 3                  | 1                                             | 1                                                                 |
|                                                | Burned-out NASH          | 3                                             | 0                                                                 |

<sup>a</sup>Microscopic features (steatosis, lobular inflammation, ballooning and fibrosis) were evaluated according to the non-alcoholic fatty disease (NAFLD) activity score (NAS) (14). <sup>b</sup>NASH stage was defined according to the Brunt classification (15). <sup>c</sup>Non-cancerous liver tissue showing NASH (A) and the corresponding cancerous tissue (B) were obtained from the same individuals.

## (B) Patients with hepatocellular carcinoma (HCC)

| Clinicopathological parameters  |            | Patients' age and the number of patients |                                    |
|---------------------------------|------------|------------------------------------------|------------------------------------|
|                                 |            | NASH-related HCC (n=22) <sup>c</sup>     | Hepatitis virus-related HCC (n=37) |
| Age (years)                     |            | 71.23 ± 7.65                             | 60.81 ± 10.71                      |
| Sex                             | Male       | 20                                       | 32                                 |
|                                 | Female     | 2                                        | 5                                  |
| Tumor diameter (cm)             |            | 5.46 ± 2.66                              | 4.30 ± 1.84                        |
| Histological grade <sup>d</sup> | Well-      | 3                                        | 3                                  |
|                                 | Moderately | 14                                       | 19                                 |
|                                 | Poorly     | 5                                        | 15                                 |
| TNM stage <sup>e</sup>          | I          | 7                                        | 16                                 |
|                                 | II         | 11                                       | 16                                 |
|                                 | IIIA       | 2                                        | 0                                  |
|                                 | IIIB       | 2                                        | 2                                  |
|                                 | IIIC       | 0                                        | 2                                  |
|                                 | IVA        | 0                                        | 1                                  |
|                                 | IVB        | 0                                        | 0                                  |

<sup>c</sup>Non-cancerous liver tissue showing NASH (A) and the corresponding cancerous tissue (B) were obtained from the same individuals.

<sup>d</sup>Histological grade of HCCs was in accordance with the World Health Organization classification (16). <sup>e</sup>TNM stage was defined according to the Union for International Cancer Control Tumor-Node-Metastasis classification (17).
