# Supplementary material for: Genome-wide DNA methylation analysis during non-alcoholic steatohepatitis-related multistage hepatocarcinogenesis: comparison with hepatitis virus-related carcinogenesis
Source: PubMed Central journal article supplement — Carcinogenesis. 2017 Jan 25;38(3):261–70. doi: 10.1093/carcin/bgx005 (PMC5862314; doi:10.1093/carcin/bgx005), 2017-01-25
Supplement: bgx005_suppl_kuramoto_supplementary_table_s2_revised.pdf [file bgx005_suppl_kuramoto_supplementary_table_s2_revised.pdf]

Supplementary Table S2 Probe and primer sets used for TaqMan Gene Expression Assays for quantitative reverse transcription-PCR.

| Gene         | Probe and primer set              |
|--------------|-----------------------------------|
| <i>WHSC1</i> | Hs00370212_m1 (Life technologies) |
| <i>GAPDH</i> | Hs02758991_g1 (Life Technologies) |
