# Supplementary material for: Genome-wide DNA methylation analysis during non-alcoholic steatohepatitis-related multistage hepatocarcinogenesis: comparison with hepatitis virus-related carcinogenesis
Source: PubMed Central journal article supplement — Carcinogenesis. 2017 Jan 25;38(3):261–70. doi: 10.1093/carcin/bgx005 (PMC5862314; doi:10.1093/carcin/bgx005), 2017-01-25
Supplement: bgx005_suppl_kuramoto_supplementary_table_s3_revised.pdf [file bgx005_suppl_kuramoto_supplementary_table_s3_revised.pdf]

Supplementary Table S3 The probes for which call proportions in all examined tissue samples were less than 90%.

| Target ID <sup>a</sup> | Chromosome | Gene symbol         | Call proportion (%) <sup>b</sup> |
|------------------------|------------|---------------------|----------------------------------|
| cg24834873             | 5          | <i>ANKRD34B</i>     | 1.07                             |
| cg07811112             | 15         | <i>NA</i>           | 10.00                            |
| cg23699809             | 8          | <i>INTS9</i>        | 17.86                            |
| cg11317459             | 13         | <i>MIPEPP3</i>      | 18.21                            |
| cg15544633             | 2          | <i>LIPT1</i>        | 18.93                            |
| cg14117320             | 11         | <i>PLEKHA7</i>      | 21.07                            |
| cg05341252             | 6          | <i>HLA-DQB1</i>     | 24.29                            |
| cg25985455             | 20         | <i>PSMA7</i>        | 24.64                            |
| cg27627215             | 8          | <i>NA</i>           | 26.07                            |
| cg11866463             | 21         | <i>RCAN1</i>        | 26.79                            |
| cg09476440             | 1          | <i>KIAA1324</i>     | 30.36                            |
| cg07225509             | 5          | <i>GALNT10</i>      | 31.07                            |
| cg22653957             | 2          | <i>ALPPL2</i>       | 31.43                            |
| cg17251423             | 5          | <i>NA</i>           | 32.86                            |
| cg22764591             | 12         | <i>LOC100506844</i> | 32.86                            |
| cg00749520             | 19         | <i>TMEM238</i>      | 32.86                            |
| cg09307193             | 14         | <i>ACTN1</i>        | 33.93                            |
| cg22681945             | 1          | <i>NA</i>           | 34.64                            |
| cg03391002             | 12         | <i>WSCD2</i>        | 36.07                            |
| cg20060160             | 1          | <i>NMNAT2</i>       | 36.79                            |
| cg18428180             | 6          | <i>KIAA0319</i>     | 37.14                            |
| cg05208607             | 16         | <i>TLDC1</i>        | 37.50                            |
| cg11791288             | 1          | <i>LOC284551</i>    | 38.93                            |
| cg11834635             | 4          | <i>ZFYVE28</i>      | 38.93                            |
| cg06001854             | 5          | <i>SCAMP1</i>       | 38.93                            |
| cg06573709             | 6          | <i>NA</i>           | 38.93                            |
| cg19976037             | 17         | <i>CCDC57</i>       | 40.00                            |
| cg24098252             | 12         | <i>GPR133</i>       | 40.36                            |
| cg16808927             | 16         | <i>WDR90</i>        | 40.71                            |
| cg13004509             | 11         | <i>CCDC67</i>       | 41.07                            |
| cg18845950             | 6          | <i>NA</i>           | 41.43                            |
| cg10804726             | 17         | <i>DNAI2</i>        | 41.43                            |
| cg19235801             | 10         | <i>NA</i>           | 42.86                            |
| cg20908200             | 20         | <i>SNAP25-AS1</i>   | 42.86                            |
| cg04937939             | 2          | <i>NA</i>           | 43.21                            |
| cg03216697             | 6          | <i>HLA-C</i>        | 44.29                            |
| cg02018764             | 8          | <i>NA</i>           | 45.00                            |
| cg01469864             | 5          | <i>CPLX2</i>        | 45.36                            |
| cg05419812             | 6          | <i>NA</i>           | 45.36                            |
| cg04926385             | 8          | <i>NA</i>           | 45.36                            |
| cg10506445             | 1          | <i>NR5A2</i>        | 46.07                            |
| cg08335702             | 12         | <i>MTERFD3</i>      | 46.43                            |
| cg10385522             | 6          | <i>HLA-DRB1</i>     | 46.79                            |
| cg26709433             | 6          | <i>NA</i>           | 47.14                            |
| cg23505044             | 17         | <i>NTN1</i>         | 47.50                            |
| cg14359894             | 20         | <i>RASSF2</i>       | 47.86                            |
| cg05708441             | 2          | <i>NA</i>           | 48.57                            |

|            |    |                         |       |
|------------|----|-------------------------|-------|
| cg15954684 | 3  | NA                      | 48.93 |
| cg02902672 | 6  | <i>HLA-DQB1</i>         | 49.29 |
| cg17724121 | 11 | <i>HBE1</i>             | 49.29 |
| cg18442075 | 17 | <i>NKIRAS2</i>          | 49.29 |
| cg06075393 | 20 | <i>RASSF2</i>           | 49.29 |
| cg21741515 | 3  | <i>TM4SF19-TCTEXID2</i> | 49.64 |
| cg14310877 | 6  | NA                      | 49.64 |
| cg03007623 | 19 | <i>CDKN2D</i>           | 49.64 |
| cg03271827 | 4  | <i>PCGF3</i>            | 50.00 |
| cg03959986 | 17 | <i>SRR</i>              | 50.36 |
| cg18938907 | 1  | <i>GSTM1</i>            | 50.71 |
| cg01790920 | 5  | <i>IRX1</i>             | 50.71 |
| cg06559318 | 6  | <i>HLA-DRB6</i>         | 51.43 |
| cg17831170 | 6  | NA                      | 51.43 |
| cg27362989 | 6  | <i>HLA-DRB5</i>         | 51.43 |
| cg12546355 | 7  | NA                      | 52.14 |
| cg15048554 | 12 | <i>BTBD11</i>           | 52.14 |
| cg14803009 | 2  | <i>MSH2</i>             | 52.50 |
| cg12280242 | 4  | NA                      | 52.50 |
| cg17976473 | 10 | <i>DMBT1</i>            | 52.50 |
| cg06850186 | 7  | NA                      | 52.86 |
| cg01710670 | 16 | NA                      | 52.86 |
| cg08702834 | 9  | <i>DMRT3</i>            | 53.21 |
| cg17901463 | 1  | <i>GSTM1</i>            | 53.57 |
| cg13312387 | 2  | <i>NMUR1</i>            | 53.57 |
| cg13739333 | 6  | <i>HLA-DRB5</i>         | 53.57 |
| cg00814186 | 17 | NA                      | 53.57 |
| cg10662395 | 19 | <i>HCN2</i>             | 53.57 |
| cg14669863 | 1  | <i>HCN3</i>             | 53.93 |
| cg04777551 | 6  | <i>HLA-DQB1</i>         | 53.93 |
| cg18500967 | 7  | NA                      | 55.00 |
| cg21164095 | 1  | <i>BAI2</i>             | 55.36 |
| cg18944924 | 2  | <i>RMDN2</i>            | 55.36 |
| cg02126896 | 11 | NA                      | 55.36 |
| cg27156510 | 17 | <i>B9D1</i>             | 55.36 |
| cg16514085 | 6  | <i>HLA-DRB1</i>         | 55.71 |
| cg08589776 | 4  | NA                      | 56.07 |
| cg00873648 | 6  | NA                      | 56.07 |
| cg23905789 | 6  | <i>HLA-DRB1</i>         | 56.79 |
| cg01157718 | 6  | NA                      | 57.14 |
| cg26881268 | 11 | NA                      | 57.14 |
| cg10123347 | 14 | <i>DDHD1</i>            | 57.14 |
| cg01500431 | 22 | <i>GSTTP2</i>           | 57.14 |
| cg01744396 | 22 | <i>GSTT1</i>            | 57.14 |
| cg04824771 | 22 | <i>LOC391322</i>        | 57.14 |
| cg05380919 | 22 | <i>GSTT1</i>            | 57.14 |
| cg15254640 | 22 | <i>GSTT1</i>            | 57.14 |
| cg22666875 | 22 | <i>GSTTP1</i>           | 57.14 |
| cg01474688 | 2  | <i>SP3</i>              | 57.50 |
| cg16699528 | 7  | <i>PVRIG</i>            | 57.50 |
| cg07642767 | 10 | NA                      | 57.50 |
| cg01957799 | 22 | <i>GSTT1</i>            | 57.50 |

|            |    |                  |       |
|------------|----|------------------|-------|
| cg08219170 | 22 | <i>GSTT1</i>     | 57.50 |
| cg12015991 | 6  | <i>HLA-DRB5</i>  | 57.86 |
| cg11478607 | 22 | <i>GSTT1</i>     | 57.86 |
| cg24336839 | 22 | <i>GSTT1</i>     | 57.86 |
| cg00061551 | 16 | <i>ALG1</i>      | 58.21 |
| cg00256329 | 17 | <i>NXN</i>       | 58.21 |
| cg12182903 | 4  | <i>NA</i>        | 58.57 |
| cg14075454 | 6  | <i>HLA-DRB1</i>  | 58.57 |
| cg18576210 | 6  | <i>HIST1H2AB</i> | 58.57 |
| cg20311868 | 7  | <i>WBSCR27</i>   | 58.57 |
| cg00259849 | 8  | <i>CSMD1</i>     | 58.57 |
| cg20064778 | 22 | <i>GSTT1</i>     | 58.57 |
| cg24238852 | 22 | <i>GSTT1</i>     | 58.57 |
| cg11849573 | 7  | <i>NA</i>        | 58.93 |
| cg15577010 | 2  | <i>NMUR1</i>     | 59.29 |
| cg19516921 | 6  | <i>HLA-DRB5</i>  | 59.29 |
| cg06180910 | 22 | <i>GSTT1</i>     | 59.29 |
| cg19648023 | 2  | <i>MIR548N</i>   | 59.64 |
| cg15244290 | 6  | <i>GUCA1A</i>    | 59.64 |
| cg27129744 | 19 | <i>ZNF583</i>    | 59.64 |
| cg18433519 | 6  | <i>KIAA0319</i>  | 60.00 |
| cg14834300 | 1  | <i>NA</i>        | 60.36 |
| cg02943303 | 2  | <i>TXNDC9</i>    | 60.36 |
| cg26430986 | 5  | <i>GABRP</i>     | 60.36 |
| cg05929129 | 12 | <i>GALNT9</i>    | 60.36 |
| cg01550813 | 7  | <i>NA</i>        | 60.71 |
| cg00013655 | 16 | <i>PIGQ</i>      | 60.71 |
| cg17422543 | 2  | <i>NA</i>        | 61.07 |
| cg10546252 | 22 | <i>GSTT1</i>     | 61.07 |
| cg16997375 | 22 | <i>GSTT1</i>     | 61.07 |
| cg10032131 | 11 | <i>SLC43A1</i>   | 61.43 |
| cg09975044 | 14 | <i>NA</i>        | 61.43 |
| cg18021992 | 20 | <i>ITPA</i>      | 61.43 |
| cg21442271 | 22 | <i>NA</i>        | 61.43 |
| cg12564102 | 2  | <i>NA</i>        | 61.79 |
| cg27128560 | 10 | <i>COL17A1</i>   | 61.79 |
| cg07258408 | 2  | <i>TSSC1</i>     | 62.14 |
| cg07643074 | 4  | <i>NA</i>        | 62.50 |
| cg13910785 | 6  | <i>HLA-DRB1</i>  | 62.50 |
| cg15293181 | 2  | <i>SNTG2</i>     | 62.86 |
| cg14035247 | 4  | <i>NA</i>        | 62.86 |
| cg15253861 | 6  | <i>HLA-DPA1</i>  | 62.86 |
| cg15680603 | 6  | <i>HLA-DPA1</i>  | 62.86 |
| cg22047338 | 19 | <i>C19orf35</i>  | 62.86 |
| cg00399895 | 22 | <i>APOBEC3G</i>  | 63.21 |
| cg19032705 | 5  | <i>SH3PXD2B</i>  | 63.57 |
| cg19774683 | 6  | <i>HLA-DRB6</i>  | 63.57 |
| cg22802296 | 1  | <i>PBX1</i>      | 64.29 |
| cg17966121 | 13 | <i>ZIC5</i>      | 64.29 |
| cg24565820 | 22 | <i>LOC391322</i> | 64.29 |
| cg10769535 | 1  | <i>DNM3OS</i>    | 64.64 |
| cg01253711 | 4  | <i>NA</i>        | 64.64 |

|            |    |                  |       |
|------------|----|------------------|-------|
| cg14104700 | 13 | <i>MIPEPP3</i>   | 64.64 |
| cg27635110 | 2  | <i>MYTIL</i>     | 65.00 |
| cg25664050 | 6  | <i>HLA-DRB6</i>  | 65.00 |
| cg08708231 | 11 | <i>OPCML</i>     | 65.00 |
| cg27112983 | 16 | <i>NA</i>        | 65.00 |
| cg13874759 | 17 | <i>ENPP7</i>     | 65.00 |
| cg04879348 | 2  | <i>GCC2</i>      | 65.36 |
| cg06236987 | 6  | <i>FLJ34503</i>  | 65.36 |
| cg20945531 | 6  | <i>FLJ34503</i>  | 65.36 |
| cg05754819 | 10 | <i>KCNMA1</i>    | 65.36 |
| cg08299859 | 10 | <i>NA</i>        | 65.71 |
| cg25120325 | 10 | <i>PNLIPRP2</i>  | 65.71 |
| cg06206057 | 6  | <i>NA</i>        | 66.07 |
| cg18356634 | 7  | <i>NA</i>        | 66.07 |
| cg23472400 | 7  | <i>TAF6</i>      | 66.07 |
| cg09988111 | 16 | <i>NA</i>        | 66.07 |
| cg06008419 | 8  | <i>NA</i>        | 66.43 |
| cg04636967 | 10 | <i>DMBT1</i>     | 66.43 |
| cg14186264 | 6  | <i>C6orf58</i>   | 66.79 |
| cg06407043 | 12 | <i>NA</i>        | 66.79 |
| cg23007425 | 14 | <i>NA</i>        | 66.79 |
| cg01445689 | 7  | <i>WDR60</i>     | 67.14 |
| cg04649587 | 8  | <i>TDH</i>       | 67.14 |
| cg23316161 | 12 | <i>ZNF605</i>    | 67.14 |
| cg11170468 | 11 | <i>OR8G1</i>     | 67.50 |
| cg17446339 | 11 | <i>HTATIP2</i>   | 67.50 |
| cg25972924 | 12 | <i>RHNO1</i>     | 67.50 |
| cg27665146 | 15 | <i>TNFAIP8L3</i> | 67.50 |
| cg22696546 | 1  | <i>CNST</i>      | 67.86 |
| cg14228300 | 7  | <i>IGFBP3</i>    | 67.86 |
| cg01600516 | 17 | <i>ALOX12</i>    | 67.86 |
| cg25155022 | 20 | <i>NA</i>        | 67.86 |
| cg05362314 | 4  | <i>NA</i>        | 68.21 |
| cg10995422 | 6  | <i>HLA-DRB6</i>  | 68.21 |
| cg18825597 | 8  | <i>NA</i>        | 68.21 |
| cg22304543 | 8  | <i>NA</i>        | 68.21 |
| cg03466083 | 5  | <i>NA</i>        | 68.57 |
| cg01948083 | 1  | <i>NA</i>        | 68.93 |
| cg03296304 | 11 | <i>DEAF1</i>     | 68.93 |
| cg13636640 | 20 | <i>DNMT3B</i>    | 68.93 |
| cg01061164 | 6  | <i>FAM120B</i>   | 69.29 |
| cg06398883 | 13 | <i>NA</i>        | 69.29 |
| cg08634464 | 19 | <i>ZNF57</i>     | 69.29 |
| cg19726599 | 4  | <i>AFAP1</i>     | 69.64 |
| cg08231637 | 6  | <i>HLA-DRB1</i>  | 69.64 |
| cg14744161 | 6  | <i>DSE</i>       | 69.64 |
| cg14294953 | 9  | <i>MIR4289</i>   | 69.64 |
| cg01493009 | 13 | <i>FOXO1</i>     | 69.64 |
| cg02262167 | 13 | <i>NA</i>        | 69.64 |
| cg00534215 | 16 | <i>ACSF3</i>     | 69.64 |
| cg01707391 | 16 | <i>NA</i>        | 69.64 |
| cg05156850 | 2  | <i>KRCC1</i>     | 70.00 |

|            |    |          |       |
|------------|----|----------|-------|
| cg01914365 | 3  | NA       | 70.00 |
| cg20848488 | 4  | PPP2R2C  | 70.00 |
| cg27129755 | 5  | GABRP    | 70.00 |
| cg06012695 | 6  | NA       | 70.00 |
| cg10217052 | 6  | HLA-DQA1 | 70.00 |
| cg17504698 | 13 | PSPCI    | 70.36 |
| cg26924012 | 15 | SPATA5L1 | 70.36 |
| cg05919324 | 17 | RPH3AL   | 70.36 |
| cg01519225 | 6  | NA       | 70.71 |
| cg18792536 | 7  | UPK3B    | 70.71 |
| cg03478313 | 15 | NA       | 70.71 |
| cg13574744 | 19 | NFIC     | 70.71 |
| cg18015625 | 2  | B3GALT1  | 71.07 |
| cg07774765 | 5  | BTNL9    | 71.07 |
| cg22025232 | 6  | HCG4B    | 71.07 |
| cg02847425 | 7  | UPK3B    | 71.07 |
| cg00886571 | 14 | NA       | 71.07 |
| cg03673787 | 17 | GAA      | 71.07 |
| cg01232331 | 2  | NA       | 71.43 |
| cg17421046 | 6  | HLA-DQA1 | 71.43 |
| cg10577585 | 10 | POLL     | 71.43 |
| cg11454325 | 10 | GPR123   | 71.43 |
| cg05276972 | 11 | NA       | 71.43 |
| cg17025908 | 1  | NA       | 71.79 |
| cg05383619 | 6  | HLA-DRB1 | 71.79 |
| cg02856402 | 16 | HMOX2    | 71.79 |
| cg03965138 | 19 | SIGLEC5  | 71.79 |
| cg14740251 | 19 | NA       | 71.79 |
| cg19432688 | 2  | NA       | 72.14 |
| cg10911276 | 4  | NA       | 72.14 |
| cg05546241 | 6  | NA       | 72.14 |
| cg05176970 | 17 | NXN      | 72.14 |
| cg16661157 | 17 | PRKCA    | 72.14 |
| cg06955954 | 13 | ATP4B    | 72.50 |
| cg14293999 | 14 | NA       | 72.50 |
| cg13117582 | 17 | NA       | 72.50 |
| cg20336016 | 19 | NA       | 72.50 |
| cg06536159 | 1  | FHAD1    | 72.86 |
| cg08268047 | 1  | FMO2     | 72.86 |
| cg14181874 | 2  | NA       | 72.86 |
| cg01550828 | 3  | RNF168   | 72.86 |
| cg08433110 | 6  | GMDS     | 72.86 |
| cg02764429 | 15 | PRKXP1   | 72.86 |
| cg25971649 | 1  | CD58     | 73.21 |
| cg15853771 | 2  | NA       | 73.21 |
| cg05185684 | 11 | PLEKHA7  | 73.21 |
| cg25730351 | 11 | ANO1     | 73.21 |
| cg26294145 | 14 | NA       | 73.21 |
| cg09194930 | 16 | MTIL     | 73.21 |
| cg16670573 | 16 | POLR3K   | 73.21 |
| cg08703522 | 17 | NA       | 73.21 |
| cg22525743 | 19 | DYRK1B   | 73.21 |

|            |    |                 |       |
|------------|----|-----------------|-------|
| cg22956547 | 19 | <i>ZNF155</i>   | 73.21 |
| cg24205048 | 19 | <i>SIGLEC5</i>  | 73.21 |
| cg24049183 | 3  | <i>WNT5A</i>    | 73.57 |
| cg14799809 | 6  | <i>HLA-DQA1</i> | 73.57 |
| cg27083089 | 6  | <i>HLA-B</i>    | 73.57 |
| cg07777042 | 8  | <i>NA</i>       | 73.57 |
| cg20511966 | 8  | <i>TRAPPC9</i>  | 73.57 |
| cg10099275 | 12 | <i>PLCZ1</i>    | 73.57 |
| cg07119157 | 1  | <i>TNFRSF18</i> | 73.93 |
| cg14708411 | 5  | <i>SLC12A7</i>  | 73.93 |
| cg02249577 | 10 | <i>NA</i>       | 73.93 |
| cg09462281 | 19 | <i>NCLN</i>     | 73.93 |
| cg18682380 | 19 | <i>LENG9</i>    | 73.93 |
| cg10325211 | 2  | <i>NA</i>       | 74.29 |
| cg01823585 | 7  | <i>NA</i>       | 74.29 |
| cg09918394 | 12 | <i>CERS5</i>    | 74.29 |
| cg00014203 | 17 | <i>TMEM88</i>   | 74.29 |
| cg21114725 | 3  | <i>NA</i>       | 74.64 |
| cg13749113 | 15 | <i>NA</i>       | 74.64 |
| cg04057378 | 20 | <i>NA</i>       | 74.64 |
| cg23243080 | 5  | <i>TNFAIP8</i>  | 75.00 |
| cg11888470 | 6  | <i>HLA-DRB6</i> | 75.00 |
| cg15014361 | 6  | <i>HLA-DQA1</i> | 75.00 |
| cg24973221 | 10 | <i>INPP5A</i>   | 75.00 |
| cg11919336 | 12 | <i>HCAR2</i>    | 75.00 |
| cg01647917 | 19 | <i>GZMM</i>     | 75.00 |
| cg19600472 | 6  | <i>HCG4B</i>    | 75.36 |
| cg16662938 | 10 | <i>GUCY2GP</i>  | 75.36 |
| cg02234672 | 13 | <i>NA</i>       | 75.36 |
| cg11193865 | 14 | <i>DLK1</i>     | 75.36 |
| cg15535896 | 18 | <i>NA</i>       | 75.36 |
| cg04277055 | 4  | <i>NA</i>       | 75.71 |
| cg14557864 | 4  | <i>TRIM60</i>   | 75.71 |
| cg15654485 | 6  | <i>HLA-DRB6</i> | 75.71 |
| cg24356700 | 7  | <i>SRRT</i>     | 75.71 |
| cg27441354 | 7  | <i>NA</i>       | 75.71 |
| cg00727777 | 8  | <i>NA</i>       | 75.71 |
| cg08208480 | 11 | <i>BRSK2</i>    | 75.71 |
| cg00169792 | 20 | <i>SALL4</i>    | 75.71 |
| cg24253618 | 1  | <i>NA</i>       | 76.07 |
| cg10125291 | 4  | <i>NA</i>       | 76.07 |
| cg00978846 | 6  | <i>HLA-DQA1</i> | 76.07 |
| cg26651280 | 16 | <i>GALNS</i>    | 76.07 |
| cg02403292 | 5  | <i>SLIT3</i>    | 76.43 |
| cg15700429 | 6  | <i>HLA-DRB6</i> | 76.43 |
| cg27074113 | 11 | <i>NA</i>       | 76.43 |
| cg09214175 | 14 | <i>CCDC85C</i>  | 76.43 |
| cg16034991 | 19 | <i>SIGLEC14</i> | 76.43 |
| cg03873518 | 22 | <i>GRAMD4</i>   | 76.43 |
| cg24670453 | 1  | <i>BGLAP</i>    | 76.79 |
| cg04696840 | 6  | <i>HLA-DQB1</i> | 76.79 |
| cg21692241 | 6  | <i>HLA-DQA1</i> | 76.79 |

|            |    |                     |       |
|------------|----|---------------------|-------|
| cg12126656 | 10 | <i>INPP5A</i>       | 76.79 |
| cg12988522 | 12 | <i>SHMT2</i>        | 76.79 |
| cg24680646 | 13 | <i>TRPC4</i>        | 76.79 |
| cg16003256 | 1  | <i>NA</i>           | 77.14 |
| cg14926231 | 2  | <i>NA</i>           | 77.14 |
| cg27640988 | 2  | <i>RNF103</i>       | 77.14 |
| cg07952421 | 4  | <i>UGT2B17</i>      | 77.14 |
| cg17851276 | 4  | <i>NA</i>           | 77.14 |
| cg04424052 | 6  | <i>PERP</i>         | 77.14 |
| cg06293782 | 6  | <i>HLA-DQA2</i>     | 77.14 |
| cg15152149 | 6  | <i>SERPINB1</i>     | 77.14 |
| cg07559763 | 8  | <i>NA</i>           | 77.14 |
| cg24414182 | 19 | <i>MYADM</i>        | 77.14 |
| cg12074150 | 2  | <i>NA</i>           | 77.50 |
| cg27425262 | 2  | <i>PSD4</i>         | 77.50 |
| cg11256764 | 5  | <i>NA</i>           | 77.50 |
| cg14323910 | 6  | <i>HLA-DQB1</i>     | 77.50 |
| cg06924902 | 8  | <i>ZFAT-AS1</i>     | 77.50 |
| cg00538591 | 16 | <i>CBFA2T3</i>      | 77.50 |
| cg11884832 | 6  | <i>NA</i>           | 77.86 |
| cg26531700 | 6  | <i>NA</i>           | 77.86 |
| cg06943073 | 12 | <i>SRGAP1</i>       | 77.86 |
| cg20098848 | 12 | <i>NA</i>           | 77.86 |
| cg02890235 | 19 | <i>NA</i>           | 77.86 |
| cg10747483 | 19 | <i>NA</i>           | 77.86 |
| cg20381372 | 19 | <i>LOC100134317</i> | 77.86 |
| cg25395304 | 19 | <i>ZNF234</i>       | 77.86 |
| cg11517650 | 1  | <i>ETV3</i>         | 78.21 |
| cg22854985 | 2  | <i>MLK7-AS1</i>     | 78.21 |
| cg11816734 | 5  | <i>NA</i>           | 78.21 |
| cg21234342 | 6  | <i>GPR116</i>       | 78.21 |
| cg25336926 | 7  | <i>FZD1</i>         | 78.21 |
| cg24873924 | 11 | <i>NA</i>           | 78.21 |
| cg13491296 | 1  | <i>MIR9-1</i>       | 78.57 |
| cg09217309 | 6  | <i>RAET1G</i>       | 78.57 |
| cg22816462 | 8  | <i>NA</i>           | 78.57 |
| cg00988056 | 14 | <i>NA</i>           | 78.57 |
| cg16558846 | 14 | <i>NA</i>           | 78.57 |
| cg23988024 | 19 | <i>HCN2</i>         | 78.57 |
| cg27521160 | 19 | <i>PSG4</i>         | 78.57 |
| cg08465120 | 1  | <i>BCAN</i>         | 78.93 |
| cg21697769 | 2  | <i>AGAP1</i>        | 78.93 |
| cg18868178 | 10 | <i>NA</i>           | 78.93 |
| cg07900998 | 17 | <i>ASIC2</i>        | 78.93 |
| cg27257987 | 19 | <i>PSG4</i>         | 78.93 |
| cg06461588 | 20 | <i>DNAJC5</i>       | 78.93 |
| cg05372444 | 7  | <i>UPK3B</i>        | 79.29 |
| cg10986355 | 7  | <i>GRM8</i>         | 79.29 |
| cg13685349 | 14 | <i>STON2</i>        | 79.29 |
| cg00504457 | 19 | <i>MCOLN1</i>       | 79.29 |
| cg17520080 | 1  | <i>LUZP1</i>        | 79.64 |
| cg11727304 | 7  | <i>GALNTL5</i>      | 79.64 |

|            |    |                 |       |
|------------|----|-----------------|-------|
| cg03183700 | 8  | <i>ANK1</i>     | 79.64 |
| cg00742920 | 13 | <i>NA</i>       | 79.64 |
| cg17370981 | 13 | <i>ATP4B</i>    | 79.64 |
| cg19809575 | 16 | <i>BANP</i>     | 79.64 |
| cg24239165 | 17 | <i>NA</i>       | 79.64 |
| cg27347523 | 19 | <i>SIGLEC5</i>  | 79.64 |
| cg01546248 | 22 | <i>SMTN</i>     | 79.64 |
| cg09219182 | 22 | <i>NCF4</i>     | 79.64 |
| cg02751273 | 2  | <i>NA</i>       | 80.00 |
| cg03562350 | 2  | <i>NA</i>       | 80.00 |
| cg14506194 | 2  | <i>DIRC3</i>    | 80.00 |
| cg24629711 | 3  | <i>MUSTN1</i>   | 80.00 |
| cg00103771 | 6  | <i>HLA-DRB6</i> | 80.00 |
| cg00567916 | 9  | <i>NTNG2</i>    | 80.00 |
| cg11844537 | 10 | <i>TCERG1L</i>  | 80.00 |
| cg15161973 | 10 | <i>TCERG1L</i>  | 80.00 |
| cg23130832 | 10 | <i>TCERG1L</i>  | 80.00 |
| cg23954274 | 10 | <i>NA</i>       | 80.00 |
| cg22837486 | 11 | <i>FADS3</i>    | 80.00 |
| cg15406319 | 17 | <i>NKIRAS2</i>  | 80.00 |
| cg00869309 | 19 | <i>ZNF835</i>   | 80.00 |
| cg10583942 | 1  | <i>TNFRSF18</i> | 80.36 |
| cg11536248 | 2  | <i>NA</i>       | 80.36 |
| cg05401575 | 3  | <i>SYNPR</i>    | 80.36 |
| cg17089062 | 4  | <i>NA</i>       | 80.36 |
| cg22627029 | 6  | <i>HLA-DRB6</i> | 80.36 |
| cg08617581 | 10 | <i>TCERG1L</i>  | 80.36 |
| cg10270204 | 14 | <i>NA</i>       | 80.36 |
| cg12505938 | 16 | <i>GAN</i>      | 80.36 |
| cg00448895 | 19 | <i>ZNF333</i>   | 80.36 |
| cg01238044 | 22 | <i>GSTT1</i>    | 80.36 |
| cg10536901 | 1  | <i>SLC25A24</i> | 80.71 |
| cg00507055 | 6  | <i>TMEM63B</i>  | 80.71 |
| cg10018004 | 6  | <i>HLA-A</i>    | 80.71 |
| cg12770425 | 6  | <i>NA</i>       | 80.71 |
| cg14044669 | 6  | <i>C6orf10</i>  | 80.71 |
| cg24760581 | 6  | <i>HLA-DRB1</i> | 80.71 |
| cg18353405 | 7  | <i>NA</i>       | 80.71 |
| cg06063541 | 10 | <i>TCERG1L</i>  | 80.71 |
| cg11872966 | 10 | <i>TCERG1L</i>  | 80.71 |
| cg06732825 | 12 | <i>NA</i>       | 80.71 |
| cg16733676 | 1  | <i>SLC25A24</i> | 81.07 |
| cg11019305 | 5  | <i>UBTD2</i>    | 81.07 |
| cg13017022 | 5  | <i>ZMAT2</i>    | 81.07 |
| cg03923227 | 6  | <i>C6orf25</i>  | 81.07 |
| cg20706766 | 6  | <i>ITPR3</i>    | 81.07 |
| cg00859877 | 7  | <i>PTPRN2</i>   | 81.07 |
| cg26450259 | 10 | <i>R3HCC1L</i>  | 81.07 |
| cg13141283 | 13 | <i>PCDH20</i>   | 81.07 |
| cg02549424 | 22 | <i>AIFM3</i>    | 81.07 |
| cg16142906 | 22 | <i>RFPL3</i>    | 81.07 |
| cg14654471 | 1  | <i>NPHP4</i>    | 81.43 |



|            |    |           |       |
|------------|----|-----------|-------|
| cg17838368 | 1  | NA        | 81.43 |
| cg21345624 | 2  | BOK-ASI   | 81.43 |
| cg06051312 | 3  | PPP4R2    | 81.43 |
| cg09654329 | 4  | RGS12     | 81.43 |
| cg24800226 | 4  | SORCS2    | 81.43 |
| cg04124201 | 5  | NA        | 81.43 |
| cg16251399 | 6  | GUSBP4    | 81.43 |
| cg18474443 | 10 | PFKP      | 81.43 |
| cg17107246 | 1  | SLC25A24  | 81.79 |
| cg17590135 | 2  | NA        | 81.79 |
| cg03999583 | 3  | NA        | 81.79 |
| cg20935984 | 3  | NA        | 81.79 |
| cg22489785 | 5  | AQPEP     | 81.79 |
| cg01864468 | 6  | NA        | 81.79 |
| cg12391576 | 6  | HLA-DPA1  | 81.79 |
| cg01317586 | 15 | LINC00925 | 81.79 |
| cg18254123 | 15 | NA        | 81.79 |
| cg08210468 | 2  | NA        | 82.14 |
| cg06111799 | 3  | IFT57     | 82.14 |
| cg18697348 | 3  | SELK      | 82.14 |
| cg19687193 | 5  | NDUFS6    | 82.14 |
| cg02145102 | 6  | NA        | 82.14 |
| cg04054303 | 6  | HLA-DQA1  | 82.14 |
| cg04953552 | 6  | NA        | 82.14 |
| cg18969004 | 6  | HCG27     | 82.14 |
| cg11573390 | 10 | TCERG1L   | 82.14 |
| cg13830619 | 12 | NA        | 82.14 |
| cg03423038 | 17 | NLE1      | 82.14 |
| cg27392904 | 19 | IL4I1     | 82.14 |
| cg08514194 | 21 | KRTAP12-4 | 82.14 |
| cg11967332 | 1  | SLC25A24  | 82.50 |
| cg12479705 | 4  | NA        | 82.50 |
| cg20964594 | 4  | CPZ       | 82.50 |
| cg03231275 | 6  | BTNL2     | 82.50 |
| cg12846737 | 6  | NA        | 82.50 |
| cg07889790 | 8  | ERICHI    | 82.50 |
| cg21301341 | 13 | GJA3      | 82.50 |
| cg11942206 | 19 | PSG1      | 82.50 |
| cg21485898 | 19 | ZNF836    | 82.50 |
| cg17888219 | 20 | DEFB127   | 82.50 |
| cg05751189 | 2  | SLC9A4    | 82.86 |
| cg20913063 | 2  | BCL11A    | 82.86 |
| cg25598710 | 2  | NA        | 82.86 |
| cg22112152 | 3  | NA        | 82.86 |
| cg05786381 | 4  | FAM53A    | 82.86 |
| cg07075387 | 4  | NA        | 82.86 |
| cg15321244 | 6  | HLA-DQB2  | 82.86 |
| cg26375284 | 6  | HLA-H     | 82.86 |
| cg07964753 | 8  | NA        | 82.86 |
| cg02936593 | 11 | NA        | 82.86 |
| cg16273509 | 11 | PAMRI     | 82.86 |
| cg20694666 | 13 | N6AMT2    | 82.86 |

|            |    |                       |       |
|------------|----|-----------------------|-------|
| cg10772532 | 14 | <i>CEP128</i>         | 82.86 |
| cg23812489 | 1  | <i>FLG2</i>           | 83.21 |
| cg10263003 | 2  | <i>NA</i>             | 83.21 |
| cg04246123 | 6  | <i>HCG4B</i>          | 83.21 |
| cg14555649 | 6  | <i>DKFZP686I15217</i> | 83.21 |
| cg23536255 | 6  | <i>NA</i>             | 83.21 |
| cg04368789 | 7  | <i>NA</i>             | 83.21 |
| cg14228103 | 7  | <i>PTN</i>            | 83.21 |
| cg09797202 | 10 | <i>SCD</i>            | 83.21 |
| cg01702501 | 15 | <i>RGMA</i>           | 83.21 |
| cg09052185 | 6  | <i>HLA-DQA1</i>       | 83.57 |
| cg09535768 | 6  | <i>HLA-DPBI</i>       | 83.57 |
| cg16535653 | 6  | <i>NA</i>             | 83.57 |
| cg18424635 | 6  | <i>HLA-DRB5</i>       | 83.57 |
| cg20798066 | 6  | <i>NA</i>             | 83.57 |
| cg25283336 | 6  | <i>HLA-DPA1</i>       | 83.57 |
| cg00474465 | 10 | <i>HMX2</i>           | 83.57 |
| cg15214366 | 13 | <i>CDX2</i>           | 83.57 |
| cg24086348 | 17 | <i>ABCA6</i>          | 83.57 |
| cg24417155 | 17 | <i>NA</i>             | 83.57 |
| cg00055434 | 1  | <i>PLCH2</i>          | 83.93 |
| cg24903159 | 2  | <i>NA</i>             | 83.93 |
| cg25613667 | 5  | <i>WDR55</i>          | 83.93 |
| cg09312897 | 6  | <i>HLA-DQB1</i>       | 83.93 |
| cg15591384 | 6  | <i>HLA-DRB6</i>       | 83.93 |
| cg26590106 | 6  | <i>HLA-DRB1</i>       | 83.93 |
| cg08119527 | 7  | <i>NA</i>             | 83.93 |
| cg24120210 | 7  | <i>RADIL</i>          | 83.93 |
| cg18761058 | 11 | <i>MACROD1</i>        | 83.93 |
| cg18924965 | 14 | <i>ANG</i>            | 83.93 |
| cg06844719 | 16 | <i>NA</i>             | 83.93 |
| cg22166914 | 1  | <i>ZYG11B</i>         | 84.29 |
| cg01479912 | 2  | <i>PDIA6</i>          | 84.29 |
| cg10313151 | 2  | <i>NA</i>             | 84.29 |
| cg12932813 | 3  | <i>TRMT10C</i>        | 84.29 |
| cg06503255 | 5  | <i>DND1</i>           | 84.29 |
| cg00648423 | 6  | <i>NA</i>             | 84.29 |
| cg01540522 | 8  | <i>KBTBD11</i>        | 84.29 |
| cg25249362 | 10 | <i>PFKP</i>           | 84.29 |
| cg27346510 | 10 | <i>TCERG1L</i>        | 84.29 |
| cg02666610 | 11 | <i>NA</i>             | 84.29 |
| cg16886051 | 11 | <i>GVINP1</i>         | 84.29 |
| cg24680742 | 17 | <i>TBCD</i>           | 84.29 |
| cg25103043 | 19 | <i>PRKCG</i>          | 84.29 |
| cg18148498 | 1  | <i>NA</i>             | 84.64 |
| cg22504140 | 1  | <i>NA</i>             | 84.64 |
| cg18913843 | 2  | <i>HPCAL1</i>         | 84.64 |
| cg21544437 | 2  | <i>NA</i>             | 84.64 |
| cg10277872 | 4  | <i>NA</i>             | 84.64 |
| cg21543103 | 5  | <i>PAPD7</i>          | 84.64 |
| cg20341836 | 6  | <i>HCG4B</i>          | 84.64 |
| cg24638099 | 6  | <i>HLA-DRB6</i>       | 84.64 |

|            |    |                     |       |
|------------|----|---------------------|-------|
| cg02464808 | 8  | <i>DEFA1B</i>       | 84.64 |
| cg16866567 | 8  | <i>PLEKHA2</i>      | 84.64 |
| cg21858113 | 11 | <i>SCN4B</i>        | 84.64 |
| cg25165144 | 12 | <i>B4GALNT3</i>     | 84.64 |
| cg01801090 | 14 | <i>FLJ31306</i>     | 84.64 |
| cg10182287 | 14 | <i>ATXN3</i>        | 84.64 |
| cg08152839 | 15 | <i>ST8SIA2</i>      | 84.64 |
| cg16515500 | 18 | <i>MC5R</i>         | 84.64 |
| cg03199239 | 19 | <i>GNG7</i>         | 84.64 |
| cg15734230 | 19 | <i>NA</i>           | 84.64 |
| cg02890368 | 20 | <i>GNAS</i>         | 84.64 |
| cg13501907 | 2  | <i>NA</i>           | 85.00 |
| cg13585749 | 2  | <i>NA</i>           | 85.00 |
| cg23340935 | 2  | <i>DIRC3</i>        | 85.00 |
| cg00741675 | 4  | <i>DGKQ</i>         | 85.00 |
| cg05840289 | 5  | <i>ANKRD33B</i>     | 85.00 |
| cg18409782 | 5  | <i>NA</i>           | 85.00 |
| cg15225267 | 6  | <i>NA</i>           | 85.00 |
| cg20968290 | 6  | <i>CDKAL1</i>       | 85.00 |
| cg22993154 | 6  | <i>NA</i>           | 85.00 |
| cg11896151 | 7  | <i>FAM20C</i>       | 85.00 |
| cg14457452 | 9  | <i>CDK5RAP2</i>     | 85.00 |
| cg22202264 | 11 | <i>IGSF9B</i>       | 85.00 |
| cg05565442 | 12 | <i>NA</i>           | 85.00 |
| cg08861434 | 13 | <i>NA</i>           | 85.00 |
| cg18827503 | 13 | <i>NA</i>           | 85.00 |
| cg26936989 | 14 | <i>FBLN5</i>        | 85.00 |
| cg06634367 | 17 | <i>RCVRN</i>        | 85.00 |
| cg00638631 | 21 | <i>KCNJ6</i>        | 85.00 |
| cg19043679 | 5  | <i>RGS14</i>        | 85.36 |
| cg05366160 | 6  | <i>HLA-DPA1</i>     | 85.36 |
| cg15633912 | 10 | <i>NA</i>           | 85.36 |
| cg26527903 | 12 | <i>NA</i>           | 85.36 |
| cg25598086 | 14 | <i>HSPA2</i>        | 85.36 |
| cg03833077 | 19 | <i>OLFM2</i>        | 85.36 |
| cg01442889 | 1  | <i>PLCH2</i>        | 85.71 |
| cg11413152 | 1  | <i>ERI3</i>         | 85.71 |
| cg04890266 | 3  | <i>ADCY5</i>        | 85.71 |
| cg26657539 | 4  | <i>NA</i>           | 85.71 |
| cg07368937 | 5  | <i>IRX4</i>         | 85.71 |
| cg10115321 | 6  | <i>CSNK2B</i>       | 85.71 |
| cg12168509 | 6  | <i>HLA-DPA1</i>     | 85.71 |
| cg14022523 | 6  | <i>LOC100289495</i> | 85.71 |
| cg07025011 | 7  | <i>PDE1C</i>        | 85.71 |
| cg23403836 | 7  | <i>PSMG3-ASI</i>    | 85.71 |
| cg03136151 | 1  | <i>BRDT</i>         | 86.07 |
| cg04394763 | 1  | <i>DENND4B</i>      | 86.07 |
| cg09385306 | 1  | <i>C1orf52</i>      | 86.07 |
| cg07805383 | 2  | <i>NA</i>           | 86.07 |
| cg15744668 | 2  | <i>NA</i>           | 86.07 |
| cg08823359 | 4  | <i>PAPSS1</i>       | 86.07 |
| cg07630345 | 6  | <i>HCG27</i>        | 86.07 |

|            |    |                    |       |
|------------|----|--------------------|-------|
| cg15408512 | 10 | <i>TUBGCP2</i>     | 86.07 |
| cg25601879 | 10 | <i>NA</i>          | 86.07 |
| cg16202259 | 14 | <i>KIF26A</i>      | 86.07 |
| cg04461745 | 17 | <i>NA</i>          | 86.07 |
| cg24419602 | 19 | <i>NA</i>          | 86.07 |
| cg02953382 | 22 | <i>LOC391322</i>   | 86.07 |
| cg09249173 | 1  | <i>TMEM51</i>      | 86.43 |
| cg11987751 | 1  | <i>SLC35E2</i>     | 86.43 |
| cg17355877 | 1  | <i>PRKCZ</i>       | 86.43 |
| cg23421392 | 2  | <i>PDIA6</i>       | 86.43 |
| cg00762069 | 3  | <i>COL6A4P2</i>    | 86.43 |
| cg24153901 | 3  | <i>GLT8D1</i>      | 86.43 |
| cg08943467 | 5  | <i>LPCAT1</i>      | 86.43 |
| cg21610927 | 5  | <i>TRIO</i>        | 86.43 |
| cg02735423 | 6  | <i>HLA-DRB5</i>    | 86.43 |
| cg04710276 | 6  | <i>HCG27</i>       | 86.43 |
| cg12929486 | 6  | <i>SLC22A16</i>    | 86.43 |
| cg17480035 | 6  | <i>HLA-DRB1</i>    | 86.43 |
| cg12257634 | 11 | <i>NRXN2</i>       | 86.43 |
| cg24417798 | 12 | <i>FAM101A</i>     | 86.43 |
| cg22805356 | 15 | <i>NA</i>          | 86.43 |
| cg25576961 | 15 | <i>TTC23</i>       | 86.43 |
| cg10047753 | 17 | <i>NA</i>          | 86.43 |
| cg00843105 | 19 | <i>ZNF234</i>      | 86.43 |
| cg15616006 | 19 | <i>MIR518C</i>     | 86.43 |
| cg04169610 | 22 | <i>SERHL2</i>      | 86.43 |
| cg07641578 | 22 | <i>CYP2D7P1</i>    | 86.43 |
| cg09616536 | 3  | <i>ADAMTS9-AS2</i> | 86.79 |
| cg10348826 | 3  | <i>NA</i>          | 86.79 |
| cg11044162 | 3  | <i>ADAMTS9-AS2</i> | 86.79 |
| cg00123128 | 4  | <i>DOK7</i>        | 86.79 |
| cg07108441 | 4  | <i>SORBS2</i>      | 86.79 |
| cg09623286 | 4  | <i>TLR2</i>        | 86.79 |
| cg16443079 | 5  | <i>NA</i>          | 86.79 |
| cg02458000 | 6  | <i>NA</i>          | 86.79 |
| cg03344051 | 6  | <i>HLA-DQB1</i>    | 86.79 |
| cg18715193 | 6  | <i>HLA-DPA1</i>    | 86.79 |
| cg07449652 | 7  | <i>SEMA3C</i>      | 86.79 |
| cg23228529 | 7  | <i>PKD1L1</i>      | 86.79 |
| cg12833683 | 8  | <i>VPS13B</i>      | 86.79 |
| cg20479209 | 8  | <i>MROH5</i>       | 86.79 |
| cg06088084 | 10 | <i>BMS1P1</i>      | 86.79 |
| cg06889571 | 10 | <i>ADARB2</i>      | 86.79 |
| cg16917193 | 12 | <i>NA</i>          | 86.79 |
| cg23476830 | 13 | <i>ZIC5</i>        | 86.79 |
| cg04245766 | 14 | <i>BMP4</i>        | 86.79 |
| cg07904290 | 16 | <i>NA</i>          | 86.79 |
| cg17789193 | 19 | <i>NA</i>          | 86.79 |
| cg02775404 | 22 | <i>NA</i>          | 86.79 |
| cg15198148 | 1  | <i>FAAH</i>        | 87.14 |
| cg27514105 | 1  | <i>HCRTR1</i>      | 87.14 |
| cg26944725 | 2  | <i>LYPD6B</i>      | 87.14 |

|            |    |          |       |
|------------|----|----------|-------|
| cg09710920 | 5  | NA       | 87.14 |
| cg02979711 | 6  | HLA-H    | 87.14 |
| cg10690152 | 6  | DDAH2    | 87.14 |
| cg08310519 | 11 | ME3      | 87.14 |
| cg12150991 | 11 | SCUBE2   | 87.14 |
| cg16112226 | 11 | KIRREL3  | 87.14 |
| cg18954658 | 11 | NA       | 87.14 |
| cg16248432 | 12 | DIP2B    | 87.14 |
| cg03830006 | 17 | ENPP7    | 87.14 |
| cg09080788 | 17 | CDRT15P1 | 87.14 |
| cg17854747 | 18 | RNF138   | 87.14 |
| cg06587249 | 19 | ZNF71    | 87.14 |
| cg22944307 | 19 | NA       | 87.14 |
| cg18021902 | 1  | WRAP73   | 87.50 |
| cg18991601 | 2  | FZD5     | 87.50 |
| cg22496339 | 2  | NA       | 87.50 |
| cg16819848 | 4  | ZFYVE28  | 87.50 |
| cg15613905 | 5  | MCC      | 87.50 |
| cg13516209 | 6  | HLA-H    | 87.50 |
| cg14870156 | 6  | HLA-DPA1 | 87.50 |
| cg15568074 | 6  | HLA-DRB1 | 87.50 |
| cg26482585 | 6  | NA       | 87.50 |
| cg05073382 | 8  | MYOM2    | 87.50 |
| cg05832925 | 11 | NA       | 87.50 |
| cg02747151 | 15 | ATP10A   | 87.50 |
| cg06736229 | 1  | NA       | 87.86 |
| cg15818357 | 1  | COL8A2   | 87.86 |
| cg25501666 | 2  | NA       | 87.86 |
| cg04520948 | 3  | PSMD2    | 87.86 |
| cg22134413 | 5  | NA       | 87.86 |
| cg19493134 | 6  | HLA-B    | 87.86 |
| cg22901297 | 6  | HLA-DRB6 | 87.86 |
| cg24470466 | 6  | HLA-DQA1 | 87.86 |
| cg27107292 | 6  | HLA-DRB1 | 87.86 |
| cg27414868 | 6  | NA       | 87.86 |
| cg22168087 | 7  | HIBADH   | 87.86 |
| cg25376032 | 11 | MOB2     | 87.86 |
| cg11507597 | 12 | NA       | 87.86 |
| cg22237018 | 13 | GPC6     | 87.86 |
| cg20460697 | 18 | MALT1    | 87.86 |
| cg15580304 | 20 | MIR941-1 | 87.86 |
| cg19521610 | 22 | NA       | 87.86 |
| cg08942192 | 1  | SLC25A24 | 88.21 |
| cg14856563 | 1  | NA       | 88.21 |
| cg24506221 | 1  | GSTMI    | 88.21 |
| cg01717482 | 3  | NA       | 88.21 |
| cg23737713 | 3  | NDUFB4   | 88.21 |
| cg14854798 | 4  | NA       | 88.21 |
| cg23921777 | 4  | UVSSA    | 88.21 |
| cg05258009 | 5  | NA       | 88.21 |
| cg02818451 | 6  | DPCR1    | 88.21 |
| cg06064954 | 6  | NA       | 88.21 |

|            |    |                     |       |
|------------|----|---------------------|-------|
| cg08010331 | 6  | <i>HLA-DPA1</i>     | 88.21 |
| cg13056744 | 6  | <i>NA</i>           | 88.21 |
| cg18423635 | 6  | <i>NA</i>           | 88.21 |
| cg26981746 | 6  | <i>HLA-DRB5</i>     | 88.21 |
| cg03062166 | 9  | <i>FAM219A</i>      | 88.21 |
| cg03187668 | 11 | <i>OR4C6</i>        | 88.21 |
| cg19831575 | 11 | <i>FGF4</i>         | 88.21 |
| cg23795893 | 11 | <i>PGR</i>          | 88.21 |
| cg22729460 | 12 | <i>NA</i>           | 88.21 |
| cg24221398 | 12 | <i>NA</i>           | 88.21 |
| cg19659004 | 14 | <i>AMN</i>          | 88.21 |
| cg01421525 | 16 | <i>NA</i>           | 88.21 |
| cg13948710 | 19 | <i>ZNF813</i>       | 88.21 |
| cg01861555 | 20 | <i>NA</i>           | 88.21 |
| cg11495604 | 20 | <i>KCNQ2</i>        | 88.21 |
| cg03858121 | 22 | <i>NA</i>           | 88.21 |
| cg01105403 | 2  | <i>NA</i>           | 88.57 |
| cg08289272 | 2  | <i>NA</i>           | 88.57 |
| cg00409917 | 6  | <i>HCG4B</i>        | 88.57 |
| cg01499815 | 6  | <i>NA</i>           | 88.57 |
| cg03398989 | 6  | <i>NA</i>           | 88.57 |
| cg03995122 | 6  | <i>HCG4B</i>        | 88.57 |
| cg04276750 | 6  | <i>HLA-H</i>        | 88.57 |
| cg06451157 | 6  | <i>NA</i>           | 88.57 |
| cg07584860 | 6  | <i>HLA-H</i>        | 88.57 |
| cg10804687 | 6  | <i>NA</i>           | 88.57 |
| cg14449180 | 6  | <i>HCG4B</i>        | 88.57 |
| cg15070894 | 6  | <i>HCG4B</i>        | 88.57 |
| cg17982178 | 6  | <i>NA</i>           | 88.57 |
| cg24751894 | 6  | <i>HCG4B</i>        | 88.57 |
| cg25644740 | 6  | <i>HCG4B</i>        | 88.57 |
| cg21446981 | 7  | <i>NA</i>           | 88.57 |
| cg10891570 | 8  | <i>SPAG1</i>        | 88.57 |
| cg16816400 | 9  | <i>FCN1</i>         | 88.57 |
| cg06450397 | 10 | <i>FAS</i>          | 88.57 |
| cg10317138 | 10 | <i>ADAM12</i>       | 88.57 |
| cg18621672 | 10 | <i>DYDC1</i>        | 88.57 |
| cg13311805 | 11 | <i>OR4S2</i>        | 88.57 |
| cg15141401 | 11 | <i>OR4C11</i>       | 88.57 |
| cg25150519 | 12 | <i>SLC9A7P1</i>     | 88.57 |
| cg03035657 | 16 | <i>NA</i>           | 88.57 |
| cg01552920 | 17 | <i>MYADML2</i>      | 88.57 |
| cg19776366 | 17 | <i>BAIAP2</i>       | 88.57 |
| cg24636332 | 17 | <i>SPNS2</i>        | 88.57 |
| cg23096297 | 20 | <i>DIDO1</i>        | 88.57 |
| cg06647930 | 22 | <i>PRR5-ARHGAP8</i> | 88.57 |
| cg17387122 | 22 | <i>MICAL3</i>       | 88.57 |
| cg05389555 | 1  | <i>KLHL21</i>       | 88.93 |
| cg05299459 | 2  | <i>NA</i>           | 88.93 |
| cg15080433 | 2  | <i>LY75-CD302</i>   | 88.93 |
| cg23830185 | 2  | <i>TNSI</i>         | 88.93 |
| cg17560624 | 3  | <i>FBLN2</i>        | 88.93 |

|            |    |                  |       |
|------------|----|------------------|-------|
| cg04840108 | 4  | <i>TLR6</i>      | 88.93 |
| cg18596626 | 4  | <i>NA</i>        | 88.93 |
| cg22758714 | 4  | <i>NA</i>        | 88.93 |
| cg01392179 | 5  | <i>FGF18</i>     | 88.93 |
| cg05244234 | 5  | <i>ZNF879</i>    | 88.93 |
| cg00113675 | 6  | <i>HLA-H</i>     | 88.93 |
| cg01062395 | 6  | <i>HLA-H</i>     | 88.93 |
| cg01336390 | 6  | <i>NA</i>        | 88.93 |
| cg01502466 | 6  | <i>NA</i>        | 88.93 |
| cg07147204 | 6  | <i>NA</i>        | 88.93 |
| cg08231349 | 6  | <i>HCG4B</i>     | 88.93 |
| cg10262387 | 6  | <i>HLA-H</i>     | 88.93 |
| cg10698654 | 6  | <i>TAP2</i>      | 88.93 |
| cg11993350 | 6  | <i>HLA-DRB1</i>  | 88.93 |
| cg18325044 | 6  | <i>NA</i>        | 88.93 |
| cg21810411 | 6  | <i>HLA-DRB1</i>  | 88.93 |
| cg22671410 | 6  | <i>NA</i>        | 88.93 |
| cg26127187 | 6  | <i>HLA-H</i>     | 88.93 |
| cg26649688 | 6  | <i>HLA-H</i>     | 88.93 |
| cg01139696 | 7  | <i>GNAI2</i>     | 88.93 |
| cg17803268 | 7  | <i>PTPRN2</i>    | 88.93 |
| cg06463424 | 8  | <i>NA</i>        | 88.93 |
| cg07765769 | 8  | <i>NA</i>        | 88.93 |
| cg24493971 | 8  | <i>GSDMD</i>     | 88.93 |
| cg17044529 | 11 | <i>DTX4</i>      | 88.93 |
| cg09562018 | 16 | <i>NA</i>        | 88.93 |
| cg09884893 | 16 | <i>UBE2I</i>     | 88.93 |
| cg21143224 | 17 | <i>RPTOR</i>     | 88.93 |
| cg26463170 | 18 | <i>TRAPPC8</i>   | 88.93 |
| cg04227007 | 19 | <i>LOC284412</i> | 88.93 |
| cg26316885 | 19 | <i>ICAM5</i>     | 88.93 |
| cg22846741 | 22 | <i>HIC2</i>      | 88.93 |
| cg23073032 | 1  | <i>PTPN14</i>    | 89.29 |
| cg00866836 | 2  | <i>NA</i>        | 89.29 |
| cg05995465 | 2  | <i>HDAC4</i>     | 89.29 |
| cg12400864 | 3  | <i>NA</i>        | 89.29 |
| cg27026615 | 3  | <i>PTX3</i>      | 89.29 |
| cg15599437 | 5  | <i>NA</i>        | 89.29 |
| cg23415761 | 5  | <i>GNPDA1</i>    | 89.29 |
| cg04520169 | 6  | <i>HCG4B</i>     | 89.29 |
| cg10310917 | 6  | <i>NA</i>        | 89.29 |
| cg18111114 | 6  | <i>HLA-DRB5</i>  | 89.29 |
| cg24179288 | 6  | <i>NA</i>        | 89.29 |
| cg10974412 | 7  | <i>TNS3</i>      | 89.29 |
| cg01088723 | 8  | <i>GSDMD</i>     | 89.29 |
| cg19362774 | 8  | <i>NA</i>        | 89.29 |
| cg14429748 | 9  | <i>ASTN2</i>     | 89.29 |
| cg09746817 | 10 | <i>EBF3</i>      | 89.29 |
| cg00976692 | 11 | <i>MEN1</i>      | 89.29 |
| cg10144558 | 11 | <i>TENM4</i>     | 89.29 |
| cg06350542 | 13 | <i>MCF2L</i>     | 89.29 |
| cg25291250 | 15 | <i>RFX7</i>      | 89.29 |

|            |    |                  |       |
|------------|----|------------------|-------|
| cg01247560 | 16 | <i>JPH3</i>      | 89.29 |
| cg05358715 | 16 | <i>SPATA33</i>   | 89.29 |
| cg01717830 | 17 | <i>DDX42</i>     | 89.29 |
| cg20663042 | 17 | <i>TEKT1</i>     | 89.29 |
| cg06675417 | 18 | <i>NA</i>        | 89.29 |
| cg25290355 | 19 | <i>LENG9</i>     | 89.29 |
| cg27009008 | 19 | <i>IRF2BP1</i>   | 89.29 |
| cg11882358 | 3  | <i>LOC152225</i> | 89.64 |
| cg22542451 | 3  | <i>NA</i>        | 89.64 |
| cg03807873 | 6  | <i>NA</i>        | 89.64 |
| cg04458159 | 6  | <i>HLA-H</i>     | 89.64 |
| cg07889003 | 6  | <i>HLA-DRB1</i>  | 89.64 |
| cg10474018 | 6  | <i>NA</i>        | 89.64 |
| cg15659132 | 6  | <i>NA</i>        | 89.64 |
| cg15671450 | 6  | <i>NA</i>        | 89.64 |
| cg16223220 | 6  | <i>HLA-H</i>     | 89.64 |
| cg17134700 | 6  | <i>HLA-H</i>     | 89.64 |
| cg20223237 | 6  | <i>HLA-DPA1</i>  | 89.64 |
| cg20578893 | 6  | <i>NA</i>        | 89.64 |
| cg21549632 | 6  | <i>HLA-H</i>     | 89.64 |
| cg10436877 | 7  | <i>ABCF2</i>     | 89.64 |
| cg06723525 | 10 | <i>NA</i>        | 89.64 |
| cg24127310 | 10 | <i>NA</i>        | 89.64 |
| cg27286106 | 10 | <i>FAM21C</i>    | 89.64 |
| cg25796986 | 13 | <i>F10</i>       | 89.64 |
| cg02567750 | 1  | <i>NA</i>        | 90.00 |
| cg13052034 | 1  | <i>SGIP1</i>     | 90.00 |
| cg16377948 | 1  | <i>MOV10</i>     | 90.00 |
| cg03258421 | 2  | <i>NA</i>        | 90.00 |
| cg07144255 | 2  | <i>TSSC1</i>     | 90.00 |
| cg03640465 | 4  | <i>SLC2A9</i>    | 90.00 |
| cg22071943 | 5  | <i>SLC6A18</i>   | 90.00 |
| cg25138752 | 5  | <i>NA</i>        | 90.00 |
| cg15931205 | 6  | <i>HCG4B</i>     | 90.00 |
| cg18845053 | 6  | <i>NA</i>        | 90.00 |
| cg23130010 | 6  | <i>HLA-H</i>     | 90.00 |
| cg08166019 | 7  | <i>NA</i>        | 90.00 |
| cg13145550 | 7  | <i>NA</i>        | 90.00 |
| cg23090207 | 8  | <i>GSDMD</i>     | 90.00 |
| cg05650055 | 11 | <i>MYEOV</i>     | 90.00 |
| cg15985500 | 11 | <i>MPPED2</i>    | 90.00 |
| cg02757577 | 15 | <i>NA</i>        | 90.00 |
| cg06118351 | 16 | <i>C16orf71</i>  | 90.00 |
| cg09499248 | 16 | <i>POLR3K</i>    | 90.00 |
| cg16700025 | 16 | <i>CMIP</i>      | 90.00 |
| cg18627179 | 19 | <i>RPL18A</i>    | 90.00 |
| cg24303062 | 20 | <i>COMMD7</i>    | 90.00 |

<sup>a</sup>Probe ID of the Infinium HumanMethylation 450 BeadChip. <sup>b</sup>*P*-values for detection of a signal above the background <0.01. N/A, not annotated (designed for the intergenic regions). Since low call proportions may have been attributable to polymorphism at the probe CpG sites, the above 822 probes were excluded from the present assay.
