# Supplementary material for: Genome-wide DNA methylation analysis during non-alcoholic steatohepatitis-related multistage hepatocarcinogenesis: comparison with hepatitis virus-related carcinogenesis
Source: PubMed Central journal article supplement — Carcinogenesis. 2017 Jan 25;38(3):261–70. doi: 10.1093/carcin/bgx005 (PMC5862314; doi:10.1093/carcin/bgx005), 2017-01-25
Supplement: bgx005_suppl_kuramoto_supplementary_table_s4_revised.pdf [file bgx005_suppl_kuramoto_supplementary_table_s4_revised.pdf]

Supplementary Table S4 The 375 probes that were aberrantly methylated in samples of non-cancerous liver tissue showing non-alcoholic steatohepatitis (NASH-N) relative to samples of normal liver tissue and showed significant differences in DNA methylation levels between NASH-N samples and samples of non-cancerous liver tissue showing chronic hepatitis or cirrhosis with hepatitis B or hepatitis C virus infection.

| Target ID <sup>a</sup> | Chromosome | Position <sup>b</sup> | Gene symbol <sup>c</sup> | Gene region <sup>d</sup>   |
|------------------------|------------|-----------------------|--------------------------|----------------------------|
| cg05041517             | 1          | 1,021,029             | <i>C1orf159</i>          | Gene body                  |
| cg02280859             | 1          | 1,711,185             | <i>NADK</i>              | Gene body/5'UTR/1st intron |
| cg01881525             | 1          | 2,191,558             | <i>SKI</i>               | Gene body/1st intron       |
| cg05461259             | 1          | 2,344,699             | <i>PEX10</i>             | TSS1500                    |
| cg21290290             | 1          | 2,518,275             | <i>FAM213B</i>           | Gene body/1st exon         |
| cg08679807             | 1          | 6,338,594             | <i>ACOT7</i>             | Gene body                  |
| cg02900253             | 1          | 6,673,709             | <i>PHF13</i>             | TSS200                     |
| cg15639718             | 1          | 8,361,284             | N/A                      |                            |
| cg12856855             | 1          | 9,824,113             | <i>CLSTN1</i>            | Gene body                  |
| cg08857906             | 1          | 28,156,999            | <i>PPP1R8</i>            | TSS1500                    |
| cg25364822             | 1          | 33,337,257            | <i>FNDC5</i>             | Gene body/5'UTR/1st intron |
| cg10555853             | 1          | 33,516,627            | N/A                      |                            |
| cg23710594             | 1          | 33,841,330            | <i>PHC2</i>              | TSS200                     |
| cg08579753             | 1          | 39,174,525            | N/A                      |                            |
| cg23108607             | 1          | 39,879,411            | <i>KIAA0754</i>          | Gene body/1st exon         |
| cg08117436             | 1          | 93,293,756            | N/A                      |                            |
| cg06221222             | 1          | 94,147,831            | <i>BCAR3</i>             | TSS1500                    |
| cg19777710             | 1          | 113,464,716           | <i>AKR7A2P1</i>          | TSS1500                    |
| cg01011918             | 1          | 153,013,573           | <i>SPRR2D</i>            | Gene body/5'UTR/1st exon   |
| cg24054272             | 1          | 155,243,076           | <i>CLK2</i>              | Gene body/5'UTR/1st exon   |
| cg09372808             | 1          | 167,791,030           | <i>ADCY10</i>            | Gene body                  |
| cg01488306             | 1          | 197,037,504           | <i>F13B</i>              | TSS1500                    |
| cg15832577             | 1          | 197,874,077           | <i>C1orf53</i>           | Gene body/1st intron       |
| cg01103730             | 1          | 207,038,704           | <i>IL20</i>              | TSS1500                    |
| cg15897635             | 1          | 220,697,615           | N/A                      |                            |
| cg25622855             | 1          | 228,395,347           | <i>OBSCN</i>             | TSS1500                    |
| cg13242070             | 1          | 228,652,067           | N/A                      |                            |
| cg10840412             | 1          | 235,813,424           | <i>GNG4</i>              | TSS200                     |
| cg22729008             | 1          | 245,581,518           | <i>KIF26B</i>            | Gene body                  |
| cg01815906             | 1          | 246,622,633           | <i>SMYD3</i>             | Gene body/1st intron       |
| cg00854591             | 2          | 503,097               | N/A                      |                            |
| cg04449562             | 2          | 2,000,565             | <i>MYT1L</i>             | Gene body/5'UTR            |
| cg26534993             | 2          | 3,291,401             | <i>TSSCI</i>             | Gene body                  |
| cg10328259             | 2          | 3,321,226             | <i>TSSCI</i>             | Gene body                  |
| cg04623165             | 2          | 10,372,402            | N/A                      |                            |
| cg01400712             | 2          | 25,352,206            | <i>EFR3B</i>             | Gene body                  |
| cg17696006             | 2          | 26,521,372            | N/A                      |                            |
| cg06971903             | 2          | 33,720,546            | <i>RASGRP3</i>           | Gene body/5'UTR/1st intron |
| cg04035064             | 2          | 46,243,113            | <i>PRKCE</i>             | Gene body                  |
| cg25116269             | 2          | 55,509,523            | <i>PRORS DIP</i>         | Gene body/1st exon         |
| cg19015611             | 2          | 71,126,446            | <i>VAX2</i>              | TSS1500                    |
| cg15921587             | 2          | 73,144,353            | <i>EMX1</i>              | TSS1500                    |
| cg02657641             | 2          | 79,366,059            | <i>REG1P</i>             | TSS1500                    |
| cg01287788             | 2          | 86,362,935            | <i>SNORD94</i>           | TSS200                     |
| cg25305879             | 2          | 106,814,630           | N/A                      |                            |

| Target ID <sup>a</sup> | Chromosome | Position <sup>b</sup> | Gene symbol <sup>c</sup> | Gene region <sup>d</sup>   |
|------------------------|------------|-----------------------|--------------------------|----------------------------|
| cg13134604             | 2          | 121,006,900           | N/A                      |                            |
| cg03853134             | 2          | 122,494,799           | <i>MKI67IP</i>           | TSS1500                    |
| cg22196977             | 2          | 128,263,013           | <i>IWS1</i>              | Gene body                  |
| cg14910854             | 2          | 132,254,702           | <i>LOC150776</i>         | Gene body/1st intron       |
| cg13896783             | 2          | 159,313,876           | <i>PKP4</i>              | Gene body/5'UTR/1st intron |
| cg12032648             | 2          | 166,676,897           | N/A                      |                            |
| cg05961700             | 2          | 169,937,750           | <i>DHRS9</i>             | Gene body/5'UTR/1st intron |
| cg20144008             | 2          | 173,037,423           | N/A                      |                            |
| cg27327370             | 2          | 192,746,685           | N/A                      |                            |
| cg01779076             | 2          | 201,980,642           | <i>CFLAR</i>             | TSS1500                    |
| cg02772905             | 2          | 203,484,258           | N/A                      |                            |
| cg26701810             | 2          | 232,523,418           | N/A                      |                            |
| cg07797518             | 2          | 238,536,051           | <i>LRRFIP1</i>           | TSS200                     |
| cg12198254             | 3          | 11,521,788            | <i>ATG7</i>              | Gene body                  |
| cg21654379             | 3          | 32,864,307            | <i>TRIM71</i>            | Gene body/1st intron       |
| cg09352908             | 3          | 37,017,749            | N/A                      |                            |
| cg13003239             | 3          | 49,044,627            | <i>WDR6</i>              | TSS200                     |
| cg20724227             | 3          | 50,341,694            | <i>HYAL1</i>             | TSS1500                    |
| cg06183256             | 3          | 53,124,971            | <i>RFT1</i>              | Gene body/3'UTR            |
| cg08081407             | 3          | 57,583,693            | <i>ARF4</i>              | TSS1500                    |
| cg07804735             | 3          | 113,157,476           | <i>WDR52</i>             | Gene body/5'UTR/1st intron |
| cg08830818             | 3          | 122,514,143           | <i>DIRC2</i>             | Gene body/1st exon         |
| cg06821582             | 3          | 133,115,942           | <i>TMEM108</i>           | Gene body/3'UTR            |
| cg10757852             | 3          | 141,319,363           | <i>RASA2</i>             | Gene body                  |
| cg00658085             | 3          | 149,701,119           | N/A                      |                            |
| cg18185028             | 3          | 154,042,079           | <i>DHX36</i>             | Gene body/1st exon         |
| cg04581293             | 3          | 156,889,197           | N/A                      |                            |
| cg04876223             | 3          | 182,403,247           | N/A                      |                            |
| cg10665123             | 3          | 192,271,706           | <i>FGF12</i>             | Gene body                  |
| cg05788437             | 3          | 197,476,880           | <i>FYTTD1</i>            | Gene body/1st exon         |
| cg17030981             | 4          | 205,522               | <i>ZNF876P</i>           | TSS1500                    |
| cg24187971             | 4          | 1,628,352             | N/A                      |                            |
| cg08332875             | 4          | 1,661,356             | <i>FAM53A</i>            | Gene body                  |
| cg03150409             | 4          | 1,892,317             | <i>WHSC1</i>             | Gene body/5'UTR/1st intron |
| cg20656751             | 4          | 2,061,512             | <i>NAT8L</i>             | Gene body/1st exon         |
| cg10106725             | 4          | 3,071,494             | <i>HTT-AS1</i>           | Gene body                  |
| cg01959412             | 4          | 4,861,398             | <i>MSX1</i>              | Gene body/5'UTR/1st exon   |
| cg11158902             | 4          | 6,536,914             | <i>PPP2R2C</i>           | Gene body                  |
| cg16571794             | 4          | 7,648,627             | <i>SORCS2</i>            | Gene body                  |
| cg21843114             | 4          | 26,334,859            | <i>RBPJ</i>              | Gene body/5'UTR/1st intron |
| cg12810548             | 4          | 53,579,237            | <i>SNORA26</i>           | TSS200                     |
| cg14606129             | 4          | 55,414,710            | N/A                      |                            |
| cg25695041             | 4          | 68,567,439            | <i>LOC550112</i>         | Gene body/1st intron       |
| cg21988461             | 4          | 88,008,667            | <i>AFF1</i>              | Gene body                  |
| cg17404403             | 4          | 110,737,017           | <i>GARI</i>              | Gene body/5'UTR/1st intron |
| cg14497545             | 4          | 140,754,475           | <i>MAML3</i>             | Gene body                  |
| cg16636571             | 4          | 144,939,574           | <i>GYPB</i>              | Gene body/1st intron       |
| cg07661849             | 4          | 146,686,236           | <i>ZNF827</i>            | Gene body                  |
| cg14825729             | 4          | 147,866,863           | <i>TTC29</i>             | Gene body/5'UTR/1st exon   |
| cg04069927             | 4          | 153,601,329           | <i>TMEM154</i>           | TSS200                     |
| cg23119967             | 4          | 164,110,821           | N/A                      |                            |
| cg19145138             | 4          | 177,120,416           | N/A                      |                            |
| cg04988918             | 4          | 178,366,394           | N/A                      |                            |

| Target ID <sup>a</sup> | Chromosome | Position <sup>b</sup> | Gene symbol <sup>c</sup> | Gene region <sup>d</sup>   |
|------------------------|------------|-----------------------|--------------------------|----------------------------|
| cg15285494             | 4          | 187,811,615           | N/A                      |                            |
| cg16692538             | 5          | 1,848,046             | N/A                      |                            |
| cg08650290             | 5          | 14,410,363            | <i>TRIO</i>              | Gene body                  |
| cg26330063             | 5          | 14,614,735            | <i>FAM105A</i>           | Gene body/3'UTR            |
| cg18022036             | 5          | 19,288,941            | N/A                      |                            |
| cg06536806             | 5          | 54,081,633            | N/A                      |                            |
| cg06708122             | 5          | 64,969,231            | <i>SGTB</i>              | Gene body                  |
| cg04026000             | 5          | 79,628,372            | N/A                      |                            |
| cg01419670             | 5          | 115,696,151           | N/A                      |                            |
| cg02427576             | 5          | 125,808,164           | <i>GRAMD3</i>            | Gene body                  |
| cg07893230             | 5          | 138,089,096           | <i>CTNNA1</i>            | TSS200                     |
| cg11807153             | 5          | 140,098,496           | <i>VTRNA1-2</i>          | TSS200                     |
| cg19933985             | 5          | 141,739,077           | N/A                      |                            |
| cg05714559             | 5          | 149,980,682           | <i>SYNPO</i>             | Gene body/5'UTR/1st exon   |
| cg17462962             | 5          | 154,347,281           | <i>MRPL22</i>            | Gene body/3'UTR            |
| cg12333707             | 5          | 172,199,303           | <i>DUSP1</i>             | TSS1500                    |
| cg05234035             | 5          | 172,673,203           | N/A                      |                            |
| cg04234923             | 5          | 173,147,506           | N/A                      |                            |
| cg12152193             | 5          | 175,954,583           | <i>RNF44</i>             | Gene body/3'UTR            |
| cg24618378             | 5          | 177,614,217           | <i>GMCLIP1</i>           | Gene body/1st exon         |
| cg01870519             | 6          | 693,728               | <i>EXOC2</i>             | TSS1500                    |
| cg09741240             | 6          | 3,000,097             | <i>NQO2</i>              | Gene body/5'UTR/1st exon   |
| cg11754060             | 6          | 12,012,057            | <i>HIVEP1</i>            | TSS1500                    |
| cg08782481             | 6          | 27,839,916            | <i>HIST1H3I</i>          | Gene body/1st exon         |
| cg19513374             | 6          | 28,962,971            | <i>ZNF311</i>            | Gene body                  |
| cg20235510             | 6          | 28,968,251            | <i>ZNF311</i>            | Gene body                  |
| cg25157107             | 6          | 28,979,424            | N/A                      |                            |
| cg06868245             | 6          | 30,611,830            | <i>ATAT1</i>             | Gene body                  |
| cg09408780             | 6          | 30,898,937            | N/A                      |                            |
| cg16500605             | 6          | 31,620,861            | <i>BAG6</i>              | TSS1500                    |
| cg22252462             | 6          | 31,622,318            | <i>APOM</i>              | TSS1500                    |
| cg14263351             | 6          | 32,030,890            | <i>TNXB</i>              | Gene body                  |
| cg14427382             | 6          | 32,847,112            | N/A                      |                            |
| cg04762129             | 6          | 34,105,785            | <i>GRM4</i>              | Gene body/1st intron       |
| cg26027052             | 6          | 36,821,364            | N/A                      |                            |
| cg09113046             | 6          | 37,008,627            | N/A                      |                            |
| cg09489757             | 6          | 41,006,345            | <i>UNC5CL</i>            | Gene body/5'UTR/1st intron |
| cg14047339             | 6          | 45,345,544            | <i>SUPT3H</i>            | Gene body/5'UTR/1st exon   |
| cg02643778             | 6          | 47,281,183            | N/A                      |                            |
| cg11227604             | 6          | 79,787,698            | <i>PHIP</i>              | Gene body/1st intron       |
| cg15411280             | 6          | 84,747,508            | <i>MRAP2</i>             | Gene body/5'UTR/1st intron |
| cg24725337             | 6          | 89,717,866            | N/A                      |                            |
| cg11070069             | 6          | 105,389,370           | <i>LINC00577</i>         | TSS1500                    |
| cg11010178             | 6          | 127,837,030           | <i>SOGA3</i>             | Gene body                  |
| cg23954724             | 6          | 167,032,443           | <i>RPS6KA2</i>           | Gene body/1st intron       |
| cg25512188             | 6          | 167,093,321           | <i>RPS6KA2</i>           | Gene body                  |
| cg18011078             | 7          | 1,971,098             | <i>MAD1L1</i>            | Gene body                  |
| cg10616859             | 7          | 2,586,532             | <i>BRATI</i>             | Gene body                  |
| cg23738353             | 7          | 5,322,583             | <i>SLC29A4</i>           | Gene body/5'UTR/1st exon   |
| cg24676244             | 7          | 11,872,050            | <i>THSD7A</i>            | TSS1500                    |
| cg11213199             | 7          | 43,909,298            | <i>MRPS24</i>            | TSS200                     |
| cg20706768             | 7          | 55,225,183            | <i>EGFR</i>              | Gene body                  |
| cg07516076             | 7          | 64,197,245            | N/A                      |                            |

| Target ID <sup>a</sup> | Chromosome | Position <sup>b</sup> | Gene symbol <sup>c</sup> | Gene region <sup>d</sup>   |
|------------------------|------------|-----------------------|--------------------------|----------------------------|
| cg00655923             | 7          | 64,895,418            | N/A                      |                            |
| cg23472171             | 7          | 75,051,188            | <i>POM121C</i>           | Gene body                  |
| cg01219670             | 7          | 76,054,755            | <i>ZP3</i>               | Gene body/1st intron       |
| cg02775353             | 7          | 101,814,109           | <i>CUX1</i>              | Gene body                  |
| cg02051077             | 7          | 131,241,343           | <i>PODXL</i>             | Gene body/5'UTR/1st exon   |
| cg04205664             | 7          | 139,209,511           | <i>CLEC2L</i>            | Gene body/1st intron       |
| cg25009327             | 7          | 148,820,504           | <i>ZNF425</i>            | Gene body/1st intron       |
| cg08571764             | 7          | 148,884,735           | N/A                      |                            |
| cg02158565             | 7          | 150,788,256           | <i>AGAP3</i>             | Gene body/1st intron       |
| cg08499057             | 7          | 150,909,642           | <i>ABCF2</i>             | Gene body/3'UTR            |
| cg13810766             | 7          | 151,542,452           | <i>PRKAG2</i>            | Gene body/1st intron       |
| cg15470736             | 7          | 157,056,012           | <i>UBE3C</i>             | Gene body                  |
| cg05950192             | 8          | 1,207,710             | N/A                      |                            |
| cg06463230             | 8          | 1,779,625             | <i>ARHGEF10</i>          | Gene body/5'UTR/1st intron |
| cg17057268             | 8          | 3,416,221             | <i>CSMD1</i>             | Gene body                  |
| cg06869039             | 8          | 12,838,022            | <i>KIAA1456</i>          | Gene body/5'UTR/1st intron |
| cg26725786             | 8          | 27,352,103            | <i>EPHX2</i>             | Gene body/5'UTR/1st intron |
| cg12445378             | 8          | 48,741,753            | <i>PRKDC</i>             | Gene body                  |
| cg07124229             | 8          | 53,866,529            | N/A                      |                            |
| cg01994308             | 8          | 57,122,990            | <i>PLAG1</i>             | Gene body/5'UTR/1st intron |
| cg23402397             | 8          | 63,889,805            | <i>UG0898H09</i>         | TSS1500                    |
| cg07028249             | 8          | 66,758,368            | N/A                      |                            |
| cg14039020             | 8          | 99,989,605            | N/A                      |                            |
| cg07437919             | 8          | 142,234,483           | <i>SLC45A4</i>           | Gene body/1st intron       |
| cg04490024             | 8          | 144,166,770           | N/A                      |                            |
| cg10614773             | 8          | 144,668,349           | <i>EEF1D</i>             | Gene body                  |
| cg13598426             | 9          | 2,005,484             | N/A                      |                            |
| cg14288292             | 9          | 15,232,014            | <i>TTC39B</i>            | Gene body/5'UTR/1st intron |
| cg14192188             | 9          | 135,586,036           | N/A                      |                            |
| cg13471932             | 9          | 135,992,243           | <i>RALGDS</i>            | Gene body/1st intron       |
| cg13560760             | 9          | 139,308,792           | <i>PMPCA</i>             | Gene body                  |
| cg13659914             | 9          | 139,420,642           | <i>NOTCH1</i>            | Gene body                  |
| cg14495033             | 9          | 140,707,378           | <i>EHMT1</i>             | Gene body                  |
| cg00863716             | 10         | 5,061,094             | <i>AKRIC2</i>            | TSS1500                    |
| cg27435660             | 10         | 5,935,953             | <i>FBXO18</i>            | TSS1500                    |
| cg25987208             | 10         | 8,079,618             | N/A                      |                            |
| cg17428896             | 10         | 29,938,708            | <i>SVIL</i>              | Gene body/5'UTR            |
| cg08933409             | 10         | 42,672,859            | N/A                      |                            |
| cg13846998             | 10         | 45,406,295            | <i>TMEM72</i>            | TSS1500                    |
| cg08524474             | 10         | 49,813,208            | <i>ARHGAP22</i>          | TSS200                     |
| cg03768916             | 10         | 49,813,307            | <i>ARHGAP22</i>          | TSS200                     |
| cg04285493             | 10         | 57,361,794            | N/A                      |                            |
| cg09521743             | 10         | 75,415,752            | <i>SYNPO2L</i>           | Gene body/5'UTR/1st exon   |
| cg00745835             | 10         | 80,778,842            | <i>ZMIZ1-AS1</i>         | Gene body                  |
| cg02510736             | 10         | 81,205,445            | <i>ZCCHC24</i>           | TSS200                     |
| cg04582294             | 10         | 88,022,744            | <i>GRID1</i>             | Gene body                  |
| cg02732134             | 10         | 101,732,382           | <i>DNMBP</i>             | Gene body/5'UTR/1st intron |
| cg01320048             | 10         | 115,999,405           | <i>VWA2</i>              | Gene body/5'UTR/1st intron |
| cg03176729             | 10         | 124,222,607           | <i>HTRA1</i>             | Gene body/1st intron       |
| cg04768425             | 10         | 124,222,884           | <i>HTRA1</i>             | Gene body/1st intron       |
| cg06082548             | 10         | 134,598,908           | <i>NKX6-2</i>            | Gene body                  |
| cg14276515             | 11         | 325,364               | N/A                      |                            |

| Target ID <sup>a</sup> | Chromosome | Position <sup>b</sup> | Gene symbol <sup>c</sup> | Gene region <sup>d</sup>   |
|------------------------|------------|-----------------------|--------------------------|----------------------------|
| cg14067770             | 11         | 615,950               | <i>IRF7</i>              | Gene body/5'UTR/1st exon   |
| cg21565415             | 11         | 618,993               | <i>CDHR5</i>             | Gene body                  |
| cg08206623             | 11         | 2,907,334             | <i>CDKN1C</i>            | TSS1500                    |
| cg18089569             | 11         | 14,996,490            | N/A                      |                            |
| cg10633981             | 11         | 16,779,768            | <i>C11orf58</i>          | Gene body/3'UTR            |
| cg18905668             | 11         | 18,388,147            | <i>GTF2H1</i>            | Gene body/3'UTR            |
| cg14901205             | 11         | 43,602,017            | <i>MIR129-2</i>          | TSS1500                    |
| cg19527995             | 11         | 45,825,356            | <i>SLC35C1</i>           | TSS1500                    |
| cg01838971             | 11         | 45,825,448            | <i>SLC35C1</i>           | TSS200                     |
| cg27363529             | 11         | 45,825,469            | <i>SLC35C1</i>           | TSS200                     |
| cg09452027             | 11         | 45,825,483            | <i>SLC35C1</i>           | TSS200                     |
| cg17695841             | 11         | 45,825,485            | <i>SLC35C1</i>           | TSS200                     |
| cg23062006             | 11         | 46,940,220            | <i>LRP4</i>              | TSS200                     |
| cg12375876             | 11         | 64,689,457            | N/A                      |                            |
| cg09202050             | 11         | 64,863,845            | <i>VPS51</i>             | Gene body/1st exon         |
| cg17392047             | 11         | 65,247,138            | N/A                      |                            |
| cg22870994             | 11         | 71,340,352            | N/A                      |                            |
| cg07650712             | 11         | 75,876,135            | N/A                      |                            |
| cg26952188             | 11         | 76,840,241            | <i>MYO7A</i>             | Gene body/5'UTR/1st intron |
| cg24240077             | 11         | 77,574,320            | <i>AAMDC</i>             | Gene body                  |
| cg20673919             | 11         | 125,702,313           | <i>PATE4</i>             | TSS1500                    |
| cg14319842             | 11         | 129,734,478           | <i>NFRKB</i>             | Gene body/3'UTR            |
| cg19349861             | 11         | 133,402,246           | <i>OPCML</i>             | Gene body/5'UTR/1st exon   |
| cg25884442             | 12         | 6,178,606             | <i>VWF</i>               | Gene body                  |
| cg01236961             | 12         | 6,289,370             | N/A                      |                            |
| cg24122991             | 12         | 6,985,221             | N/A                      |                            |
| cg05589762             | 12         | 10,469,147            | <i>KLRD1</i>             | Gene body/3'UTR            |
| cg03258272             | 12         | 10,570,179            | <i>KLRC3</i>             | Gene body                  |
| cg18048953             | 12         | 12,867,753            | N/A                      |                            |
| cg21268144             | 12         | 34,531,722            | N/A                      |                            |
| cg07336754             | 12         | 48,921,782            | <i>OR8S1</i>             | Gene body                  |
| cg02308712             | 12         | 52,598,204            | N/A                      |                            |
| cg23673344             | 12         | 53,162,748            | <i>KRT76</i>             | Gene body                  |
| cg00771490             | 12         | 65,008,851            | <i>RASSF3</i>            | Gene body/1st intron       |
| cg01810623             | 12         | 68,592,757            | N/A                      |                            |
| cg00236302             | 12         | 69,004,867            | <i>RAP1B</i>             | Gene body/5'UTR/1st intron |
| cg03909902             | 12         | 108,154,529           | <i>PRDM4</i>             | Gene body/5'UTR            |
| cg20982606             | 12         | 109,535,391           | <i>UNG</i>               | TSS200                     |
| cg08114617             | 12         | 110,271,441           | <i>TRPV4</i>             | TSS1500                    |
| cg20090957             | 12         | 112,279,883           | <i>MAPKAPK5</i>          | TSS200                     |
| cg04951822             | 12         | 113,345,598           | <i>OAS1</i>              | Gene body/1st intron       |
| cg01073178             | 12         | 117,537,710           | <i>TESC</i>              | TSS1500                    |
| cg08282784             | 12         | 121,454,133           | <i>C12orf43</i>          | Gene body/1st exon         |
| cg19358664             | 12         | 125,348,552           | <i>SCARB1</i>            | TSS200                     |
| cg12951997             | 12         | 132,170,889           | N/A                      |                            |
| cg07159286             | 12         | 133,779,169           | <i>ZNF268</i>            | Gene body                  |
| cg26015681             | 13         | 22,329,773            | N/A                      |                            |
| cg00648883             | 13         | 32,524,761            | <i>EEF1DP3</i>           | Gene body                  |
| cg06648759             | 13         | 40,892,751            | N/A                      |                            |
| cg14925260             | 13         | 48,807,254            | <i>ITM2B</i>             | TSS200                     |
| cg00521048             | 13         | 50,159,798            | <i>RCBTB1</i>            | TSS200                     |
| cg13473086             | 13         | 67,676,107            | <i>PCDH9</i>             | Gene body                  |
| cg11153485             | 13         | 110,431,612           | <i>IRS2</i>              | Gene body/1st intron       |
| cg21518151             | 13         | 112,631,009           | N/A                      |                            |

| Target ID <sup>a</sup> | Chromosome | Position <sup>b</sup> | Gene symbol <sup>c</sup> | Gene region <sup>d</sup> |
|------------------------|------------|-----------------------|--------------------------|--------------------------|
| cg08188555             | 14         | 23,448,951            | <i>AJUBA</i>             | Gene body/1st intron     |
| cg13067221             | 14         | 23,449,582            | <i>AJUBA</i>             | Gene body/1st intron     |
| cg13590711             | 14         | 30,440,498            | N/A                      |                          |
| cg01659197             | 14         | 30,440,586            | N/A                      |                          |
| cg12833168             | 14         | 39,856,160            | N/A                      |                          |
| cg07449447             | 14         | 55,228,808            | <i>SAMD4A</i>            | Gene body                |
| cg19502207             | 14         | 55,337,268            | <i>GCH1</i>              | Gene body/1st intron     |
| cg19996654             | 14         | 56,403,510            | N/A                      |                          |
| cg11036936             | 14         | 68,285,471            | <i>RAD51B</i>            | TSS1500                  |
| cg01775802             | 14         | 72,945,461            | <i>RGS6</i>              | Gene body                |
| cg23395177             | 14         | 77,498,304            | N/A                      |                          |
| cg03468541             | 14         | 89,029,199            | <i>ZC3H14</i>            | TSS200                   |
| cg11021810             | 14         | 89,720,620            | <i>FOXN3</i>             | Gene body                |
| cg19904425             | 14         | 94,984,530            | <i>SERPINA12</i>         | TSS1500                  |
| cg08163906             | 14         | 102,227,932           | <i>PPP2R5C</i>           | TSS1500                  |
| cg08707819             | 14         | 103,059,391           | <i>RCOR1</i>             | Gene body/1st exon       |
| cg21937244             | 14         | 103,406,412           | <i>CDC42BPB</i>          | Gene body                |
| cg00470768             | 15         | 41,285,147            | <i>INO80</i>             | Gene body                |
| cg24280607             | 15         | 41,709,584            | <i>RTF1</i>              | Gene body/1st intron     |
| cg02852238             | 15         | 42,174,934            | <i>SPTBN5</i>            | Gene body                |
| cg07467323             | 15         | 65,134,028            | <i>PLEKHO2</i>           | TSS200                   |
| cg05781996             | 15         | 65,481,537            | N/A                      |                          |
| cg07576222             | 15         | 67,357,975            | <i>SMAD3</i>             | TSS1500                  |
| cg15888301             | 15         | 73,344,233            | <i>NEO1</i>              | TSS1500                  |
| cg12384499             | 15         | 89,949,617            | N/A                      |                          |
| cg13417485             | 15         | 91,494,820            | <i>UNC45A</i>            | Gene body                |
| cg04318546             | 15         | 101,147,087           | <i>ASB7</i>              | Gene body/5'UTR          |
| cg09709592             | 16         | 2,580,833             | <i>CEMP1</i>             | Gene body/1st exon       |
| cg02205746             | 16         | 2,732,724             | <i>KCTD5</i>             | Gene body/1st exon       |
| cg04548722             | 16         | 4,844,753             | <i>SMIM22</i>            | TSS1500                  |
| cg10475689             | 16         | 12,142,335            | <i>SNX29</i>             | Gene body                |
| cg09844907             | 16         | 15,489,619            | <i>MPV17L</i>            | Gene body/5'UTR/1st exon |
| cg09141413             | 16         | 19,896,246            | <i>GPRC5B</i>            | TSS200                   |
| cg26979044             | 16         | 25,045,552            | N/A                      |                          |
| cg16362480             | 16         | 30,077,084            | <i>ALDOA</i>             | Gene body/5'UTR/1st exon |
| cg00192773             | 16         | 30,131,641            | <i>MAPK3</i>             | Gene body                |
| cg16699818             | 16         | 48,479,333            | N/A                      |                          |
| cg13373996             | 16         | 56,598,820            | <i>MT4</i>               | TSS200                   |
| cg01443318             | 16         | 67,466,260            | <i>HSD11B2</i>           | Gene body/1st intron     |
| cg04458219             | 16         | 70,736,032            | <i>VAC14</i>             | Gene body                |
| cg08213792             | 16         | 77,747,559            | N/A                      |                          |
| cg07533100             | 16         | 83,967,363            | N/A                      |                          |
| cg01684248             | 16         | 86,536,239            | <i>FENDRR</i>            | Gene body/1st intron     |
| cg04176488             | 16         | 88,738,398            | <i>SNAI3-AS1</i>         | Gene body                |
| cg12774921             | 16         | 89,608,299            | <i>SPG7</i>              | Gene body                |
| cg07959380             | 16         | 89,894,648            | <i>SPIRE2</i>            | TSS1500                  |
| cg03321231             | 17         | 157,219               | <i>RPH3AL</i>            | Gene body                |
| cg19105961             | 17         | 4,046,223             | <i>ZZEF1</i>             | Gene body/5'UTR/1st exon |
| cg27248073             | 17         | 6,347,727             | <i>FAM64A</i>            | TSS200                   |
| cg11555339             | 17         | 7,181,894             | N/A                      |                          |
| cg11855759             | 17         | 9,548,802             | <i>USP43</i>             | TSS200                   |
| cg25365518             | 17         | 9,908,429             | <i>GAS7</i>              | Gene body                |
| cg07138452             | 17         | 17,141,020            | <i>FLCN</i>              | TSS1500                  |

| Target ID <sup>a</sup> | Chromosome | Position <sup>b</sup> | Gene symbol <sup>c</sup> | Gene region <sup>d</sup>   |
|------------------------|------------|-----------------------|--------------------------|----------------------------|
| cg14648311             | 17         | 17,359,737            | N/A                      |                            |
| cg26849884             | 17         | 18,882,139            | <i>FAM83G</i>            | Gene body                  |
| cg09436495             | 17         | 25,691,027            | N/A                      |                            |
| cg06361278             | 17         | 25,783,929            | N/A                      |                            |
| cg26939204             | 17         | 27,343,779            | N/A                      |                            |
| cg13069385             | 17         | 38,822,397            | <i>KRT222</i>            | TSS1500                    |
| cg23797200             | 17         | 40,174,494            | <i>NKIRAS2</i>           | Gene body                  |
| cg23353000             | 17         | 42,120,896            | <i>LSM12</i>             | Gene body                  |
| cg06437144             | 17         | 45,973,627            | <i>SP2</i>               | Gene body/5'UTR/1st exon   |
| cg22435132             | 17         | 59,312,558            | <i>BCAS3</i>             | Gene body                  |
| cg22290140             | 17         | 76,417,995            | <i>PGS1</i>              | Gene body/3'UTR            |
| cg25629442             | 17         | 77,070,844            | <i>ENGASE</i>            | TSS200                     |
| cg08109808             | 17         | 78,029,642            | <i>CCDC40</i>            | Gene body                  |
| cg10632328             | 17         | 78,389,079            | <i>LOC100294362</i>      | TSS200                     |
| cg11048797             | 17         | 80,450,903            | N/A                      |                            |
| cg08040148             | 17         | 81,018,426            | N/A                      |                            |
| cg25270498             | 17         | 81,037,414            | <i>METRNL</i>            | TSS200                     |
| cg01249134             | 18         | 577,110               | N/A                      |                            |
| cg06808467             | 18         | 5,237,767             | <i>LINC00526</i>         | Gene body/1st exon         |
| cg16615927             | 18         | 12,377,398            | <i>AFG3L2</i>            | TSS200                     |
| cg25824760             | 18         | 14,748,128            | <i>ANKRD30B</i>          | TSS200                     |
| cg18038361             | 18         | 29,170,604            | <i>TTR</i>               | TSS1500                    |
| cg05732725             | 18         | 59,712,034            | <i>PIGN</i>              | Gene body/3'UTR            |
| cg20390253             | 18         | 77,793,812            | <i>RBFA</i>              | TSS1500                    |
| cg25538450             | 19         | 1,847,778             | <i>REXO1</i>             | Gene body/1st intron       |
| cg14679780             | 19         | 4,059,525             | <i>ZBTB7A</i>            | Gene body/5'UTR/1st intron |
| cg01308806             | 19         | 4,276,778             | N/A                      |                            |
| cg13461178             | 19         | 4,583,451             | N/A                      |                            |
| cg09790117             | 19         | 5,476,214             | N/A                      |                            |
| cg23084309             | 19         | 6,280,164             | <i>MLL1</i>              | TSS1500                    |
| cg09112613             | 19         | 8,563,861             | <i>PRAMI</i>             | Gene body                  |
| cg22883353             | 19         | 10,377,615            | N/A                      |                            |
| cg06862696             | 19         | 11,470,209            | <i>LPPR2</i>             | Gene body                  |
| cg04364726             | 19         | 21,512,166            | <i>ZNF708</i>            | Gene body/5'UTR/1st exon   |
| cg07783291             | 19         | 33,178,679            | N/A                      |                            |
| cg14554776             | 19         | 35,772,657            | <i>HAMP</i>              | TSS1500                    |
| cg14946950             | 19         | 36,023,909            | <i>GAPDHS</i>            | TSS1500                    |
| cg05910615             | 19         | 36,248,877            | <i>PROSER3</i>           | TSS200                     |
| cg06684987             | 19         | 45,567,721            | <i>CLASRP</i>            | Gene body                  |
| cg07738077             | 19         | 53,303,448            | <i>ZNF28</i>             | Gene body                  |
| cg25252777             | 19         | 56,709,056            | N/A                      |                            |
| cg14398557             | 20         | 1,095,840             | <i>PSMF1</i>             | Gene body/5'UTR/1st intron |
| cg22876894             | 20         | 1,783,624             | N/A                      |                            |
| cg06797543             | 20         | 29,608,500            | N/A                      |                            |
| cg03027241             | 20         | 49,620,453            | <i>KCNG1</i>             | Gene body/3'UTR            |
| cg13021192             | 20         | 57,582,213            | <i>CTSZ</i>              | Gene body/5'UTR/1st exon   |
| cg21407906             | 20         | 61,427,925            | <i>MRGBP</i>             | Gene body/1st exon         |
| cg01573175             | 20         | 62,381,851            | <i>ZBTB46</i>            | Gene body                  |
| cg01198024             | 21         | 33,672,713            | <i>MRAP</i>              | Gene body                  |
| cg17499729             | 21         | 37,504,755            | <i>CBR3-ASI</i>          | Gene body                  |
| cg23322242             | 21         | 37,802,565            | N/A                      |                            |
| cg21655830             | 21         | 44,899,410            | <i>LINC00313</i>         | TSS1500                    |
| cg11381792             | 21         | 45,432,451            | <i>TRAPPC10</i>          | Gene body/1st intron       |
| cg22226852             | 21         | 46,523,156            | <i>ADARB1</i>            | Gene body/5'UTR/1st intron |

| Target ID <sup>a</sup> | Chromosome | Position <sup>b</sup> | Gene symbol <sup>c</sup> | Gene region <sup>d</sup> |
|------------------------|------------|-----------------------|--------------------------|--------------------------|
| cg05998816             | 21         | 47,859,926            | <i>PCNT</i>              | Gene body                |
| cg05367846             | 22         | 18,507,520            | <i>MICAL3</i>            | TSS200                   |
| cg18631743             | 22         | 20,104,954            | <i>RANBP1</i>            | Gene body/5'UTR/1st exon |
| cg04971769             | 22         | 22,843,648            | <i>ZNF280B</i>           | Gene body                |
| cg23113715             | 22         | 25,800,663            | N/A                      |                          |
| cg15606745             | 22         | 37,005,514            | <i>CACNG2</i>            | Gene body/1st intron     |
| cg24260710             | 22         | 42,296,082            | <i>MIR33A</i>            | TSS1500                  |
| cg18565915             | 22         | 42,489,574            | <i>NDUFA6-ASI</i>        | Gene body                |
| cg09020181             | 22         | 46,467,123            | N/A                      |                          |
| cg20769334             | 22         | 50,913,335            | <i>SBF1</i>              | Gene body/5'UTR/1st exon |
| cg25152348             | 22         | 50,946,712            | <i>NCAPH2</i>            | Gene body/5'UTR/1st exon |

<sup>a</sup>Probe ID of the Infinium HumanMethylation450 BeadChip. <sup>b</sup>National Center for Biotechnology Information (NCBI) database (Genome Build 37). <sup>c</sup>N/A, not annotated (designed for the intergenic regions). <sup>d</sup>Probe CpG sites were annotated as the region from 200 bp upstream of the transcription start site (TSS) to 1500 bp upstream of it (TSS1500), the region from TSS to 200 bp upstream of TSS (TSS200), the 5' untranslated region (UTR), the 1st exon, the 1st intron, the gene body and the 3'UTR based on the UCSC Genome Browser (<https://genome.ucsc.edu/>).
