# Supplementary material for: Genome-wide DNA methylation analysis during non-alcoholic steatohepatitis-related multistage hepatocarcinogenesis: comparison with hepatitis virus-related carcinogenesis
Source: PubMed Central journal article supplement — Carcinogenesis. 2017 Jan 25;38(3):261–70. doi: 10.1093/carcin/bgx005 (PMC5862314; doi:10.1093/carcin/bgx005), 2017-01-25
Supplement: bgx005_suppl_kuramoto_supplementary_table_s5_revised.pdf [file bgx005_suppl_kuramoto_supplementary_table_s5_revised.pdf]

Supplementary Table S5 The 194 probes showing area under the curve (AUC) values larger than 0.95 in receiver operating characteristic curve analysis for discrimination of non-cancerous liver tissue showing non-alcoholic steatohepatitis (NASH-N) samples from non-cancerous liver tissue showing chronic hepatitis of cirrhosis with hepatitis B virus or hepatitis C virus infection (viral-N) samples.

| Target ID <sup>a</sup> | Gene symbol <sup>b</sup> | AUC      | Cutoff value <sup>c</sup> | <i>P</i> value            | Sensitivity <sup>d</sup> | Specificity <sup>e</sup> | DNA methylation status <sup>f</sup> |
|------------------------|--------------------------|----------|---------------------------|---------------------------|--------------------------|--------------------------|-------------------------------------|
| cg12774921             | <i>SPG7</i>              | 1.000000 | 0.566673                  | 2.201 x 10 <sup>-39</sup> | 1.000000                 | 1.000000                 | Viral-N>NASH-N                      |
| cg08679807             | <i>ACOT7</i>             | 0.999761 | 0.756306                  | 8.037x 10 <sup>-32</sup>  | 0.991150                 | 1.000000                 | Viral-N>NASH-N                      |
| cg13560760             | <i>PMPCA</i>             | 0.998804 | 0.627133                  | 1.635 x 10 <sup>-25</sup> | 0.982301                 | 1.000000                 | Viral-N>NASH-N                      |
| cg01198024             | <i>MRAP</i>              | 0.997608 | 0.599522                  | 1.473 x 10 <sup>-26</sup> | 0.955752                 | 1.000000                 | Viral-N>NASH-N                      |
| cg08213792             | N/A                      | 0.997608 | 0.639852                  | 1.874 x 10 <sup>-23</sup> | 0.955752                 | 1.000000                 | Viral-N>NASH-N                      |
| cg20769334             | <i>SBF1</i>              | 0.996412 | 0.189463                  | 2.373 x 10 <sup>-38</sup> | 0.946903                 | 1.000000                 | Viral-N<NASH-N                      |
| cg02510736             | <i>ZCCHC24</i>           | 0.996139 | 0.168172                  | 6.807 x 10 <sup>-33</sup> | 0.991071                 | 0.945946                 | Viral-N<NASH-N                      |
| cg14067770             | <i>IRF7</i>              | 0.995695 | 0.240277                  | 5.671 x 10 <sup>-30</sup> | 0.964602                 | 0.972973                 | Viral-N<NASH-N                      |
| cg02158565             | <i>AGAP3</i>             | 0.995216 | 0.827567                  | 2.935 x 10 <sup>-33</sup> | 0.964602                 | 0.972973                 | Viral-N>NASH-N                      |
| cg07783291             | N/A                      | 0.995216 | 0.650873                  | 8.110 x 10 <sup>-23</sup> | 0.929204                 | 1.000000                 | Viral-N>NASH-N                      |
| cg26534993             | <i>TSSC1</i>             | 0.994499 | 0.588189                  | 2.024 x 10 <sup>-18</sup> | 0.982301                 | 0.972973                 | Viral-N>NASH-N                      |
| cg17499729             | <i>CBR3-AS1</i>          | 0.993781 | 0.580654                  | 9.703 x 10 <sup>-19</sup> | 0.955752                 | 0.972973                 | Viral-N>NASH-N                      |
| cg25270498             | <i>METRNL</i>            | 0.993781 | 0.201876                  | 5.933 x 10 <sup>-34</sup> | 0.929204                 | 1.000000                 | Viral-N<NASH-N                      |
| cg25622855             | <i>OBSCN</i>             | 0.993303 | 0.628235                  | 1.583 x 10 <sup>-23</sup> | 0.964602                 | 0.972973                 | Viral-N>NASH-N                      |
| cg13810766             | <i>PRKAG2</i>            | 0.993117 | 0.632623                  | 6.451 x 10 <sup>-43</sup> | 0.964602                 | 0.972222                 | Viral-N>NASH-N                      |
| cg10555853             | N/A                      | 0.992586 | 0.446822                  | 2.270 x 10 <sup>-45</sup> | 0.973451                 | 1.000000                 | Viral-N<NASH-N                      |
| cg26725786             | <i>EPHX2</i>             | 0.992519 | 0.652630                  | 3.936 x 10 <sup>-30</sup> | 0.955357                 | 1.000000                 | Viral-N>NASH-N                      |
| cg12152193             | <i>RNF44</i>             | 0.991629 | 0.677041                  | 1.133 x 10 <sup>-28</sup> | 0.955752                 | 0.972973                 | Viral-N>NASH-N                      |
| cg02205746             | <i>KCTD5</i>             | 0.991291 | 0.119288                  | 5.793 x 10 <sup>-27</sup> | 0.988889                 | 0.918919                 | Viral-N<NASH-N                      |
| cg22876894             | N/A                      | 0.990672 | 0.130920                  | 5.754 x 10 <sup>-41</sup> | 1.000000                 | 0.972973                 | Viral-N<NASH-N                      |
| cg01073178             | <i>TESC</i>              | 0.990433 | 0.135205                  | 1.772 x 10 <sup>-44</sup> | 0.929204                 | 0.972973                 | Viral-N<NASH-N                      |
| cg03321231             | <i>RPH3AL</i>            | 0.990433 | 0.756047                  | 4.562 x 10 <sup>-28</sup> | 0.991150                 | 0.972973                 | Viral-N>NASH-N                      |
| cg16362480             | <i>ALDOA</i>             | 0.990433 | 0.246298                  | 1.743 x 10 <sup>-26</sup> | 0.955752                 | 0.972973                 | Viral-N<NASH-N                      |
| cg05910615             | <i>PROSER3</i>           | 0.990194 | 0.094104                  | 1.343 x 10 <sup>-35</sup> | 0.955752                 | 0.972973                 | Viral-N<NASH-N                      |
| cg09709592             | <i>CEMP1</i>             | 0.990194 | 0.747831                  | 7.329 x 10 <sup>-21</sup> | 0.938053                 | 1.000000                 | Viral-N>NASH-N                      |
| cg03468541             | <i>ZC3H14</i>            | 0.989955 | 0.119977                  | 9.931 x 10 <sup>-40</sup> | 0.946903                 | 0.972973                 | Viral-N<NASH-N                      |
| cg13417485             | <i>UNC45A</i>            | 0.989715 | 0.669010                  | 5.212 x 10 <sup>-22</sup> | 0.920354                 | 1.000000                 | Viral-N>NASH-N                      |
| cg07138452             | <i>FLCN</i>              | 0.989237 | 0.184276                  | 6.639 x 10 <sup>-28</sup> | 0.938053                 | 0.972973                 | Viral-N<NASH-N                      |
| cg15888301             | <i>NEO1</i>              | 0.989237 | 0.139828                  | 3.480 x 10 <sup>-27</sup> | 0.964602                 | 0.972973                 | Viral-N<NASH-N                      |
| cg24054272             | <i>CLK2</i>              | 0.988998 | 0.192112                  | 9.093 x 10 <sup>-33</sup> | 0.911504                 | 1.000000                 | Viral-N<NASH-N                      |
| cg09352908             | N/A                      | 0.988280 | 0.872793                  | 1.163 x 10 <sup>-32</sup> | 0.929204                 | 0.972973                 | Viral-N>NASH-N                      |
| cg08117436             | N/A                      | 0.988041 | 0.511459                  | 1.984 x 10 <sup>-23</sup> | 0.946903                 | 0.972973                 | Viral-N>NASH-N                      |
| cg08499057             | <i>ABCF2</i>             | 0.987802 | 0.668864                  | 6.242 x 10 <sup>-21</sup> | 0.946903                 | 0.972973                 | Viral-N>NASH-N                      |
| cg05998816             | <i>PCNT</i>              | 0.987237 | 0.852972                  | 2.646 x 10 <sup>-29</sup> | 0.944444                 | 0.945946                 | Viral-N>NASH-N                      |
| cg12833168             | N/A                      | 0.986971 | 0.816690                  | 5.467 x 10 <sup>-25</sup> | 0.991150                 | 0.888889                 | Viral-N>NASH-N                      |
| cg25009327             | <i>ZNF425</i>            | 0.986845 | 0.451924                  | 4.022 x 10 <sup>-28</sup> | 0.938053                 | 0.972973                 | Viral-N>NASH-N                      |
| cg07467323             | <i>PLEKHO2</i>           | 0.985889 | 0.120582                  | 1.199 x 10 <sup>-26</sup> | 0.920354                 | 0.972973                 | Viral-N<NASH-N                      |
| cg08282784             | <i>C12orf43</i>          | 0.985889 | 0.126203                  | 6.207 x 10 <sup>-22</sup> | 0.991150                 | 0.918919                 | Viral-N<NASH-N                      |

| Target ID <sup>a</sup> | Gene symbol <sup>b</sup> | AUC      | Cutoff value <sup>c</sup> | P value                   | Sensitivity <sup>d</sup> | Specificity <sup>e</sup> | DNA methylation status <sup>f</sup> |
|------------------------|--------------------------|----------|---------------------------|---------------------------|--------------------------|--------------------------|-------------------------------------|
| cg10328259             | <i>TSSCI</i>             | 0.985889 | 0.794508                  | 3.251 x 10 <sup>-27</sup> | 0.973451                 | 0.945946                 | Viral-N>NASH-N                      |
| cg19933985             | N/A                      | 0.985889 | 0.853190                  | 7.288 x 10 <sup>-47</sup> | 0.982301                 | 0.891892                 | Viral-N>NASH-N                      |
| cg25538450             | <i>REXO1</i>             | 0.985649 | 0.171292                  | 4.652 x 10 <sup>-25</sup> | 0.938053                 | 1.000000                 | Viral-N<NASH-N                      |
| cg02732134             | <i>DNMBP</i>             | 0.985171 | 0.763663                  | 4.775 x 10 <sup>-43</sup> | 0.920354                 | 0.972973                 | Viral-N>NASH-N                      |
| cg25824760             | <i>ANKRD30B</i>          | 0.984797 | 0.254132                  | 1.763 x 10 <sup>-23</sup> | 0.955357                 | 0.972973                 | Viral-N<NASH-N                      |
| cg04548722             | <i>SMIM22</i>            | 0.983975 | 0.596889                  | 9.449 x 10 <sup>-17</sup> | 0.893805                 | 0.972973                 | Viral-N>NASH-N                      |
| cg01779076             | <i>CFLAR</i>             | 0.983258 | 0.311476                  | 3.250 x 10 <sup>-24</sup> | 0.955752                 | 0.918919                 | Viral-N<NASH-N                      |
| cg03909902             | <i>PRDM4</i>             | 0.983108 | 0.137305                  | 4.384 x 10 <sup>-35</sup> | 0.955357                 | 0.972973                 | Viral-N<NASH-N                      |
| cg08040148             | N/A                      | 0.983018 | 0.729346                  | 2.195 x 10 <sup>-21</sup> | 0.929204                 | 0.972973                 | Viral-N>NASH-N                      |
| cg08081407             | <i>ARF4</i>              | 0.982625 | 0.179647                  | 1.809 x 10 <sup>-29</sup> | 0.937500                 | 0.972973                 | Viral-N<NASH-N                      |
| cg02772905             | N/A                      | 0.982540 | 0.669629                  | 1.059 x 10 <sup>-21</sup> | 0.867257                 | 1.000000                 | Viral-N>NASH-N                      |
| cg06361278             | N/A                      | 0.982540 | 0.194101                  | 6.714 x 10 <sup>-26</sup> | 0.955752                 | 0.918919                 | Viral-N<NASH-N                      |
| cg05041517             | <i>Clorf159</i>          | 0.982384 | 0.656346                  | 6.402 x 10 <sup>-24</sup> | 0.928571                 | 0.972973                 | Viral-N>NASH-N                      |
| cg22870994             | N/A                      | 0.982301 | 0.550909                  | 1.819 x 10 <sup>-21</sup> | 0.955752                 | 0.972973                 | Viral-N>NASH-N                      |
| cg21843114             | <i>RBPJ</i>              | 0.981809 | 0.507885                  | 1.856 x 10 <sup>-19</sup> | 0.955752                 | 0.916667                 | Viral-N>NASH-N                      |
| cg09020181             | N/A                      | 0.981647 | 0.135484                  | 2.243 x 10 <sup>-29</sup> | 0.910714                 | 1.000000                 | Viral-N<NASH-N                      |
| cg11381792             | <i>TRAPPC10</i>          | 0.981583 | 0.149639                  | 1.309 x 10 <sup>-32</sup> | 0.955752                 | 0.918919                 | Viral-N<NASH-N                      |
| cg20982606             | <i>UNG</i>               | 0.981583 | 0.112968                  | 8.533 x 10 <sup>-36</sup> | 0.946903                 | 0.972973                 | Viral-N<NASH-N                      |
| cg01573175             | <i>ZBTB46</i>            | 0.981105 | 0.547973                  | 2.223 x 10 <sup>-19</sup> | 0.911504                 | 0.945946                 | Viral-N>NASH-N                      |
| cg13021192             | <i>CTSZ</i>              | 0.980627 | 0.128006                  | 6.621 x 10 <sup>-30</sup> | 0.982301                 | 0.972973                 | Viral-N<NASH-N                      |
| cg12810548             | <i>SNORA26</i>           | 0.980627 | 0.101149                  | 3.637 x 10 <sup>-38</sup> | 0.911504                 | 0.972973                 | Viral-N<NASH-N                      |
| cg08707819             | <i>RCOR1</i>             | 0.980387 | 0.365849                  | 7.606 x 10 <sup>-20</sup> | 0.902655                 | 0.972973                 | Viral-N<NASH-N                      |
| cg24122991             | N/A                      | 0.980148 | 0.719824                  | 2.620 x 10 <sup>-21</sup> | 0.902655                 | 0.972973                 | Viral-N>NASH-N                      |
| cg06808467             | <i>LINC00526</i>         | 0.979431 | 0.151636                  | 4.766 x 10 <sup>-40</sup> | 0.902655                 | 0.972973                 | Viral-N<NASH-N                      |
| cg14648311             | N/A                      | 0.979431 | 0.804682                  | 2.787 x 10 <sup>-27</sup> | 0.929204                 | 0.972973                 | Viral-N>NASH-N                      |
| cg00658085             | N/A                      | 0.979192 | 0.728478                  | 7.622 x 10 <sup>-23</sup> | 0.858407                 | 1.000000                 | Viral-N>NASH-N                      |
| cg10614773             | <i>EEF1D</i>             | 0.979192 | 0.693287                  | 2.426 x 10 <sup>-38</sup> | 0.867257                 | 1.000000                 | Viral-N>NASH-N                      |
| cg16615927             | <i>AFG3L2</i>            | 0.979192 | 0.139738                  | 2.662 x 10 <sup>-25</sup> | 0.929204                 | 0.972973                 | Viral-N<NASH-N                      |
| cg23108607             | <i>KIAA0754</i>          | 0.979192 | 0.742292                  | 2.685 x 10 <sup>-27</sup> | 0.938053                 | 0.972973                 | Viral-N>NASH-N                      |
| cg01959412             | <i>MSX1</i>              | 0.978952 | 0.130663                  | 2.759 x 10 <sup>-23</sup> | 0.920354                 | 0.918919                 | Viral-N<NASH-N                      |
| cg10757852             | <i>RASA2</i>             | 0.978952 | 0.616371                  | 1.028 x 10 <sup>-15</sup> | 0.964602                 | 0.918919                 | Viral-N>NASH-N                      |
| cg11213199             | <i>MRPS24</i>            | 0.978952 | 0.411302                  | 4.411 x 10 <sup>-20</sup> | 0.929204                 | 0.945946                 | Viral-N<NASH-N                      |
| cg08524474             | <i>ARHGAP22</i>          | 0.978474 | 0.255539                  | 1.783 x 10 <sup>-20</sup> | 0.893805                 | 1.000000                 | Viral-N<NASH-N                      |
| cg03150409             | <i>WHSC1</i>             | 0.977558 | 0.787078                  | 1.575 x 10 <sup>-45</sup> | 0.955357                 | 0.972973                 | Viral-N>NASH-N                      |
| cg12333707             | <i>DUSP1</i>             | 0.977517 | 0.422802                  | 2.569 x 10 <sup>-24</sup> | 0.920354                 | 0.972973                 | Viral-N<NASH-N                      |
| cg23472171             | <i>POM121C</i>           | 0.977075 | 0.786594                  | 5.652 x 10 <sup>-22</sup> | 0.875000                 | 0.972973                 | Viral-N>NASH-N                      |
| cg04176488             | <i>SNAI3-ASI</i>         | 0.976321 | 0.684281                  | 1.387 x 10 <sup>-19</sup> | 0.955752                 | 0.945946                 | Viral-N>NASH-N                      |
| cg09202050             | <i>VPS51</i>             | 0.976321 | 0.367675                  | 1.308 x 10 <sup>-21</sup> | 0.902655                 | 0.945946                 | Viral-N<NASH-N                      |
| cg13598426             | N/A                      | 0.976082 | 0.735804                  | 5.820 x 10 <sup>-27</sup> | 0.867257                 | 1.000000                 | Viral-N>NASH-N                      |
| cg10632328             | <i>LOC100294362</i>      | 0.975843 | 0.137928                  | 1.977 x 10 <sup>-26</sup> | 0.955752                 | 0.918919                 | Viral-N<NASH-N                      |
| cg04035064             | <i>PRKCE</i>             | 0.975365 | 0.752814                  | 6.601 x 10 <sup>-31</sup> | 0.938053                 | 0.945946                 | Viral-N>NASH-N                      |
| cg06797543             | N/A                      | 0.975365 | 0.618779                  | 3.577 x 10 <sup>-15</sup> | 0.964602                 | 0.891892                 | Viral-N>NASH-N                      |
| cg14901205             | <i>MIR129-2</i>          | 0.975365 | 0.228502                  | 7.857 x 10 <sup>-28</sup> | 0.929204                 | 0.945946                 | Viral-N<NASH-N                      |

| Target ID <sup>a</sup> | Gene symbol <sup>b</sup> | AUC      | Cutoff value <sup>c</sup> | P value                   | Sensitivity <sup>d</sup> | Specificity <sup>e</sup> | DNA methylation status <sup>f</sup> |
|------------------------|--------------------------|----------|---------------------------|---------------------------|--------------------------|--------------------------|-------------------------------------|
| cg14910854             | <i>LOC150776</i>         | 0.975365 | 0.718220                  | 1.237 x 10 <sup>-20</sup> | 0.946903                 | 0.891892                 | Viral-N>NASH-N                      |
| cg10616859             | <i>BRATI</i>             | 0.974886 | 0.711621                  | 5.977 x 10 <sup>-19</sup> | 0.902655                 | 0.945946                 | Viral-N>NASH-N                      |
| cg24240077             | <i>AAMDC</i>             | 0.974647 | 0.745371                  | 1.987 x 10 <sup>-18</sup> | 0.982301                 | 0.972973                 | Viral-N>NASH-N                      |
| cg00470768             | <i>INO80</i>             | 0.974408 | 0.624415                  | 8.310 x 10 <sup>-23</sup> | 0.955752                 | 0.891892                 | Viral-N>NASH-N                      |
| cg25629442             | <i>ENGASE</i>            | 0.974169 | 0.207714                  | 3.124 x 10 <sup>-22</sup> | 0.858407                 | 1.000000                 | Viral-N<NASH-N                      |
| cg06708122             | <i>SGTB</i>              | 0.973691 | 0.683682                  | 2.120 x 10 <sup>-18</sup> | 0.955752                 | 0.891892                 | Viral-N>NASH-N                      |
| cg11158902             | <i>PPP2R2C</i>           | 0.973691 | 0.894586                  | 9.358 x 10 <sup>-37</sup> | 0.902655                 | 0.972973                 | Viral-N>NASH-N                      |
| cg13003239             | <i>WDR6</i>              | 0.973451 | 0.229517                  | 7.676 x 10 <sup>-30</sup> | 0.973451                 | 0.891892                 | Viral-N<NASH-N                      |
| cg17404403             | <i>GARI</i>              | 0.973451 | 0.120754                  | 1.238 x 10 <sup>-27</sup> | 0.876106                 | 0.972973                 | Viral-N<NASH-N                      |
| cg05788437             | <i>FYTTD1</i>            | 0.973219 | 0.072007                  | 1.747 x 10 <sup>-37</sup> | 0.936364                 | 0.945946                 | Viral-N<NASH-N                      |
| cg23954724             | <i>RPS6KA2</i>           | 0.972973 | 0.657832                  | 2.927 x 10 <sup>-16</sup> | 1.000000                 | 0.972973                 | Viral-N>NASH-N                      |
| cg15285494             | N/A                      | 0.972734 | 0.807320                  | 3.093 x 10 <sup>-37</sup> | 0.902655                 | 0.972973                 | Viral-N>NASH-N                      |
| cg23673344             | <i>KRT76</i>             | 0.972734 | 0.698433                  | 2.331 x 10 <sup>-17</sup> | 0.982301                 | 0.972973                 | Viral-N>NASH-N                      |
| cg00854591             | N/A                      | 0.972495 | 0.740573                  | 3.258 x 10 <sup>-12</sup> | 0.982301                 | 0.972973                 | Viral-N>NASH-N                      |
| cg27435660             | <i>FBXO18</i>            | 0.972495 | 0.751658                  | 2.454 x 10 <sup>-21</sup> | 0.938053                 | 0.918919                 | Viral-N>NASH-N                      |
| cg11036936             | <i>RAD51B</i>            | 0.972255 | 0.659166                  | 6.038 x 10 <sup>-21</sup> | 0.938053                 | 0.918919                 | Viral-N>NASH-N                      |
| cg07738077             | <i>ZNF28</i>             | 0.972016 | 0.624953                  | 1.099 x 10 <sup>-16</sup> | 0.973451                 | 0.972973                 | Viral-N>NASH-N                      |
| cg18185028             | <i>DHX36</i>             | 0.972016 | 0.274648                  | 8.313 x 10 <sup>-22</sup> | 0.955752                 | 0.891892                 | Viral-N<NASH-N                      |
| cg06437144             | <i>SP2</i>               | 0.971777 | 0.142853                  | 1.374 x 10 <sup>-22</sup> | 0.964602                 | 0.864865                 | Viral-N<NASH-N                      |
| cg07650712             | N/A                      | 0.971777 | 0.693636                  | 4.648 x 10 <sup>-14</sup> | 0.982301                 | 0.972973                 | Viral-N>NASH-N                      |
| cg09741240             | <i>NQO2</i>              | 0.971777 | 0.154482                  | 2.768 x 10 <sup>-26</sup> | 0.858407                 | 0.972973                 | Viral-N<NASH-N                      |
| cg22196977             | <i>IWS1</i>              | 0.971060 | 0.736619                  | 6.808 x 10 <sup>-19</sup> | 0.876106                 | 0.945946                 | Viral-N>NASH-N                      |
| cg08579753             | N/A                      | 0.970820 | 0.563476                  | 4.384 x 10 <sup>-16</sup> | 0.964602                 | 0.972973                 | Viral-N>NASH-N                      |
| cg19105961             | <i>ZZEF1</i>             | 0.970581 | 0.335678                  | 5.314 x 10 <sup>-21</sup> | 0.911504                 | 0.972973                 | Viral-N<NASH-N                      |
| cg06869039             | <i>KIAA1456</i>          | 0.970103 | 0.798551                  | 8.100 x 10 <sup>-14</sup> | 0.991150                 | 0.945946                 | Viral-N>NASH-N                      |
| cg07028249             | N/A                      | 0.970103 | 0.657992                  | 3.030 x 10 <sup>-14</sup> | 0.982301                 | 0.945946                 | Viral-N>NASH-N                      |
| cg06971903             | <i>RASGRP3</i>           | 0.969864 | 0.643731                  | 1.777 x 10 <sup>-18</sup> | 0.867257                 | 0.972973                 | Viral-N>NASH-N                      |
| cg15470736             | <i>UBE3C</i>             | 0.969808 | 0.812652                  | 1.919 x 10 <sup>-19</sup> | 0.837838                 | 1.000000                 | Viral-N>NASH-N                      |
| cg02643778             | N/A                      | 0.968907 | 0.501416                  | 4.304 x 10 <sup>-18</sup> | 0.955752                 | 0.972973                 | Viral-N>NASH-N                      |
| cg07661849             | <i>ZNF827</i>            | 0.968429 | 0.645446                  | 2.500 x 10 <sup>-11</sup> | 0.982301                 | 0.945946                 | Viral-N>NASH-N                      |
| cg10475689             | <i>SNX29</i>             | 0.968262 | 0.596230                  | 1.437 x 10 <sup>-20</sup> | 0.853211                 | 0.972973                 | Viral-N>NASH-N                      |
| cg07804735             | <i>WDR52</i>             | 0.967711 | 0.768296                  | 1.377 x 10 <sup>-25</sup> | 0.840708                 | 0.972973                 | Viral-N>NASH-N                      |
| cg18022036             | N/A                      | 0.967711 | 0.502095                  | 2.740 x 10 <sup>-18</sup> | 0.955752                 | 0.864865                 | Viral-N<NASH-N                      |
| cg06684987             | <i>CLASRP</i>            | 0.967472 | 0.673934                  | 6.893 x 10 <sup>-14</sup> | 0.938053                 | 0.918919                 | Viral-N>NASH-N                      |
| cg13590711             | N/A                      | 0.967472 | 0.672325                  | 6.433 x 10 <sup>-11</sup> | 0.938053                 | 0.972973                 | Viral-N>NASH-N                      |
| cg04971769             | <i>ZNF280B</i>           | 0.966994 | 0.620504                  | 5.789 x 10 <sup>-12</sup> | 0.938053                 | 0.972973                 | Viral-N>NASH-N                      |
| cg04026000             | N/A                      | 0.966754 | 0.729430                  | 9.161 x 10 <sup>-17</sup> | 0.929204                 | 0.972973                 | Viral-N>NASH-N                      |
| cg27248073             | <i>FAM64A</i>            | 0.966754 | 0.326743                  | 6.048 x 10 <sup>-16</sup> | 0.929204                 | 0.945946                 | Viral-N<NASH-N                      |
| cg05367846             | <i>MICAL3</i>            | 0.966754 | 0.110755                  | 3.493 x 10 <sup>-25</sup> | 0.955752                 | 0.918919                 | Viral-N<NASH-N                      |
| cg13242070             | N/A                      | 0.966037 | 0.186884                  | 1.280 x 10 <sup>-20</sup> | 0.814159                 | 1.000000                 | Viral-N<NASH-N                      |
| cg01400712             | <i>EFR3B</i>             | 0.965798 | 0.420462                  | 6.325 x 10 <sup>-19</sup> | 0.884956                 | 0.945946                 | Viral-N<NASH-N                      |
| cg25252777             | N/A                      | 0.965798 | 0.765399                  | 1.642 x 10 <sup>-11</sup> | 0.946903                 | 0.945946                 | Viral-N>NASH-N                      |
| cg04205664             | <i>CLEC2L</i>            | 0.965558 | 0.646936                  | 6.690 x 10 <sup>-28</sup> | 0.929204                 | 0.972973                 | Viral-N>NASH-N                      |

| Target ID <sup>a</sup> | Gene symbol <sup>b</sup> | AUC      | Cutoff value <sup>c</sup> | <i>P</i> value            | Sensitivity <sup>d</sup> | Specificity <sup>e</sup> | DNA methylation status <sup>f</sup> |
|------------------------|--------------------------|----------|---------------------------|---------------------------|--------------------------|--------------------------|-------------------------------------|
| cg14497545             | <i>MAML3</i>             | 0.965558 | 0.672992                  | 2.085 x 10 <sup>-39</sup> | 0.858407                 | 0.972973                 | Viral-N>NASH-N                      |
| cg07159286             | <i>ZNF268</i>            | 0.965319 | 0.742421                  | 5.225 x 10 <sup>-16</sup> | 0.867257                 | 0.972973                 | Viral-N>NASH-N                      |
| cg26330063             | <i>FAM105A</i>           | 0.964841 | 0.647089                  | 5.552 x 10 <sup>-12</sup> | 0.973451                 | 0.945946                 | Viral-N>NASH-N                      |
| cg16500605             | <i>BAG6</i>              | 0.964768 | 0.202065                  | 6.895 x 10 <sup>-19</sup> | 0.901786                 | 0.945946                 | Viral-N<NASH-N                      |
| cg01870519             | <i>EXOC2</i>             | 0.964123 | 0.640624                  | 8.306 x 10 <sup>-16</sup> | 0.893805                 | 0.972973                 | Viral-N>NASH-N                      |
| cg08109808             | <i>CCDC40</i>            | 0.964044 | 0.669300                  | 1.742 x 10 <sup>-16</sup> | 0.866071                 | 0.945946                 | Viral-N>NASH-N                      |
| cg00521048             | <i>RCBTB1</i>            | 0.963884 | 0.190207                  | 8.383 x 10 <sup>-19</sup> | 0.964602                 | 0.864865                 | Viral-N<NASH-N                      |
| cg11021810             | <i>FOXN3</i>             | 0.963562 | 0.705837                  | 1.390 x 10 <sup>-18</sup> | 0.875000                 | 0.918919                 | Viral-N>NASH-N                      |
| cg14495033             | <i>EHMT1</i>             | 0.963406 | 0.722018                  | 4.330 x 10 <sup>-24</sup> | 0.946903                 | 0.864865                 | Viral-N>NASH-N                      |
| cg25152348             | <i>NCAPH2</i>            | 0.963320 | 0.196407                  | 6.995 x 10 <sup>-41</sup> | 0.866071                 | 0.972973                 | Viral-N<NASH-N                      |
| cg01236961             | N/A                      | 0.963167 | 0.590153                  | 1.190 x 10 <sup>-21</sup> | 0.805310                 | 1.000000                 | Viral-N>NASH-N                      |
| cg04988918             | N/A                      | 0.963167 | 0.687707                  | 9.856 x 10 <sup>-19</sup> | 0.946903                 | 0.918919                 | Viral-N>NASH-N                      |
| cg18565915             | <i>NDUFA6-ASI</i>        | 0.963167 | 0.844724                  | 5.491 x 10 <sup>-21</sup> | 0.991150                 | 0.810811                 | Viral-N>NASH-N                      |
| cg01838971             | <i>SLC35C1</i>           | 0.962688 | 0.562126                  | 2.176 x 10 <sup>-28</sup> | 0.876106                 | 0.972973                 | Viral-N>NASH-N                      |
| cg08206623             | <i>CDKN1C</i>            | 0.962688 | 0.129031                  | 8.175 x 10 <sup>-39</sup> | 0.893805                 | 0.945946                 | Viral-N<NASH-N                      |
| cg13896783             | <i>PKP4</i>              | 0.962597 | 0.328640                  | 2.270 x 10 <sup>-17</sup> | 0.910714                 | 0.972973                 | Viral-N<NASH-N                      |
| cg15639718             | N/A                      | 0.962449 | 0.657241                  | 1.308 x 10 <sup>-20</sup> | 0.849558                 | 0.972973                 | Viral-N>NASH-N                      |
| cg08571764             | N/A                      | 0.962210 | 0.712173                  | 1.363 x 10 <sup>-20</sup> | 0.902655                 | 0.918919                 | Viral-N>NASH-N                      |
| cg23113715             | N/A                      | 0.962114 | 0.284770                  | 8.986 x 10 <sup>-25</sup> | 0.830357                 | 1.000000                 | Viral-N<NASH-N                      |
| cg01320048             | <i>VWA2</i>              | 0.961873 | 0.212644                  | 2.301 x 10 <sup>-20</sup> | 0.982143                 | 0.864865                 | Viral-N<NASH-N                      |
| cg19349861             | <i>OPCML</i>             | 0.961732 | 0.121019                  | 3.101 x 10 <sup>-41</sup> | 0.840708                 | 1.000000                 | Viral-N<NASH-N                      |
| cg01815906             | <i>SMYD3</i>             | 0.961253 | 0.725994                  | 4.174 x 10 <sup>-17</sup> | 0.831858                 | 0.972973                 | Viral-N>NASH-N                      |
| cg12198254             | <i>ATG7</i>              | 0.961253 | 0.699923                  | 4.780 x 10 <sup>-19</sup> | 0.823009                 | 0.972973                 | Viral-N>NASH-N                      |
| cg04449562             | <i>MYT1L</i>             | 0.960775 | 0.727227                  | 1.717 x 10 <sup>-15</sup> | 0.946903                 | 0.945946                 | Viral-N>NASH-N                      |
| cg19777710             | <i>AKR7A2P1</i>          | 0.960775 | 0.768424                  | 1.539 x 10 <sup>-19</sup> | 0.964602                 | 0.864865                 | Viral-N>NASH-N                      |
| cg18905668             | <i>GTF2H1</i>            | 0.960423 | 0.671475                  | 8.777 x 10 <sup>-23</sup> | 0.867257                 | 0.916667                 | Viral-N>NASH-N                      |
| cg04876223             | N/A                      | 0.960057 | 0.708089                  | 2.500 x 10 <sup>-14</sup> | 0.893805                 | 0.972973                 | Viral-N>NASH-N                      |
| cg23084309             | <i>MLL1</i>              | 0.960057 | 0.230238                  | 2.928 x 10 <sup>-18</sup> | 0.787611                 | 1.000000                 | Viral-N<NASH-N                      |
| cg27363529             | <i>SLC35C1</i>           | 0.960057 | 0.592198                  | 6.006 x 10 <sup>-27</sup> | 0.938053                 | 0.891892                 | Viral-N>NASH-N                      |
| cg25364822             | <i>FNDC5</i>             | 0.959818 | 0.667222                  | 1.369 x 10 <sup>-20</sup> | 0.920354                 | 0.972973                 | Viral-N>NASH-N                      |
| cg14825729             | <i>TTC29</i>             | 0.959459 | 0.205209                  | 1.221 x 10 <sup>-15</sup> | 0.919643                 | 0.945946                 | Viral-N<NASH-N                      |
| cg27327370             | N/A                      | 0.959101 | 0.809334                  | 6.378 x 10 <sup>-12</sup> | 0.955752                 | 0.918919                 | Viral-N>NASH-N                      |
| cg11855759             | <i>USP43</i>             | 0.958862 | 0.170829                  | 1.240 x 10 <sup>-21</sup> | 0.902655                 | 0.918919                 | Viral-N<NASH-N                      |
| cg14427382             | N/A                      | 0.958736 | 0.708186                  | 1.370 x 10 <sup>-14</sup> | 0.973214                 | 0.891892                 | Viral-N>NASH-N                      |
| cg20656751             | <i>NAT8L</i>             | 0.958702 | 0.480530                  | 2.333 x 10 <sup>-14</sup> | 0.938053                 | 0.972222                 | Viral-N<NASH-N                      |
| cg07336754             | <i>OR8S1</i>             | 0.958622 | 0.663671                  | 1.127 x 10 <sup>-10</sup> | 0.938053                 | 0.918919                 | Viral-N>NASH-N                      |
| cg24280607             | <i>RTF1</i>              | 0.958622 | 0.176114                  | 1.959 x 10 <sup>-21</sup> | 0.938053                 | 0.918919                 | Viral-N<NASH-N                      |
| cg26701810             | N/A                      | 0.958622 | 0.704756                  | 5.508 x 10 <sup>-17</sup> | 0.902655                 | 0.918919                 | Viral-N>NASH-N                      |
| cg05961700             | <i>DHRS9</i>             | 0.958383 | 0.746375                  | 1.938 x 10 <sup>-24</sup> | 0.893805                 | 0.945946                 | Viral-N>NASH-N                      |
| cg20144008             | N/A                      | 0.958383 | 0.221545                  | 6.677 x 10 <sup>-30</sup> | 0.849558                 | 0.945946                 | Viral-N<NASH-N                      |
| cg15606745             | <i>CACNG2</i>            | 0.957666 | 0.626076                  | 1.106 x 10 <sup>-11</sup> | 0.920354                 | 0.945946                 | Viral-N>NASH-N                      |
| cg01488306             | <i>FI3B</i>              | 0.957426 | 0.665279                  | 6.800 x 10 <sup>-14</sup> | 0.893805                 | 0.945946                 | Viral-N>NASH-N                      |
| cg02280859             | <i>NADK</i>              | 0.957187 | 0.710030                  | 1.464 x 10 <sup>-20</sup> | 0.814159                 | 1.000000                 | Viral-N>NASH-N                      |

| Target ID <sup>a</sup> | Gene symbol <sup>b</sup> | AUC      | Cutoff value <sup>c</sup> | <i>P</i> value            | Sensitivity <sup>d</sup> | Specificity <sup>e</sup> | DNA methylation status <sup>f</sup> |
|------------------------|--------------------------|----------|---------------------------|---------------------------|--------------------------|--------------------------|-------------------------------------|
| cg07893230             | <i>CTNNA1</i>            | 0.957187 | 0.245863                  | 4.661 x 10 <sup>-18</sup> | 0.840708                 | 0.972973                 | Viral-N<NASH-N                      |
| cg22290140             | <i>PGSI</i>              | 0.957187 | 0.594645                  | 3.453 x 10 <sup>-17</sup> | 0.920354                 | 0.918919                 | Viral-N>NASH-N                      |
| cg20390253             | <i>RBFA</i>              | 0.956231 | 0.287625                  | 4.459 x 10 <sup>-19</sup> | 0.911504                 | 0.945946                 | Viral-N<NASH-N                      |
| cg02308712             | N/A                      | 0.955752 | 0.709277                  | 1.201 x 10 <sup>-19</sup> | 0.902655                 | 0.972973                 | Viral-N>NASH-N                      |
| cg02657641             | <i>REGIP</i>             | 0.955752 | 0.505961                  | 2.595 x 10 <sup>-14</sup> | 0.955752                 | 0.918919                 | Viral-N>NASH-N                      |
| cg19145138             | N/A                      | 0.955752 | 0.730868                  | 5.012 x 10 <sup>-13</sup> | 0.955752                 | 0.945946                 | Viral-N>NASH-N                      |
| cg09408780             | N/A                      | 0.955035 | 0.691539                  | 3.079 x 10 <sup>-13</sup> | 0.955752                 | 0.891892                 | Viral-N>NASH-N                      |
| cg24260710             | <i>MIR33A</i>            | 0.955035 | 0.778164                  | 3.809 x 10 <sup>-31</sup> | 0.858407                 | 1.000000                 | Viral-N>NASH-N                      |
| cg14946950             | <i>GAPDHS</i>            | 0.954317 | 0.646043                  | 5.550 x 10 <sup>-13</sup> | 0.964602                 | 0.891892                 | Viral-N>NASH-N                      |
| cg06821582             | <i>TMEM108</i>           | 0.954078 | 0.717370                  | 6.405 x 10 <sup>-8</sup>  | 0.902655                 | 0.918919                 | Viral-N>NASH-N                      |
| cg09141413             | <i>GPRC5B</i>            | 0.953839 | 0.224843                  | 7.122 x 10 <sup>-22</sup> | 0.787611                 | 1.000000                 | Viral-N<NASH-N                      |
| cg12951997             | N/A                      | 0.953839 | 0.716985                  | 8.066 x 10 <sup>-12</sup> | 0.911504                 | 0.945946                 | Viral-N>NASH-N                      |
| cg17695841             | <i>SLC35C1</i>           | 0.953839 | 0.668739                  | 5.106 x 10 <sup>-24</sup> | 0.955752                 | 0.864865                 | Viral-N>NASH-N                      |
| cg01287788             | <i>SNORD94</i>           | 0.953185 | 0.764075                  | 1.292 x 10 <sup>-38</sup> | 0.839286                 | 0.972973                 | Viral-N>NASH-N                      |
| cg09112613             | <i>PRAMI</i>             | 0.953185 | 0.729235                  | 1.237 x 10 <sup>-19</sup> | 0.857143                 | 0.918919                 | Viral-N>NASH-N                      |
| cg11048797             | N/A                      | 0.953121 | 0.848255                  | 1.959 x 10 <sup>-30</sup> | 0.849558                 | 1.000000                 | Viral-N>NASH-N                      |
| cg12384499             | N/A                      | 0.953121 | 0.156616                  | 3.813 x 10 <sup>-15</sup> | 0.929204                 | 0.837838                 | Viral-N<NASH-N                      |
| cg12445378             | <i>PRKDC</i>             | 0.952404 | 0.600700                  | 7.554 x 10 <sup>-15</sup> | 0.831858                 | 0.972973                 | Viral-N>NASH-N                      |
| cg03258272             | <i>KLRC3</i>             | 0.952165 | 0.646391                  | 6.672 x 10 <sup>-10</sup> | 0.973451                 | 0.864865                 | Viral-N>NASH-N                      |
| cg23062006             | <i>LRP4</i>              | 0.952033 | 0.164914                  | 6.757 x 10 <sup>-20</sup> | 0.945946                 | 0.864865                 | Viral-N<NASH-N                      |
| cg03768916             | <i>ARHGAP22</i>          | 0.951925 | 0.259771                  | 1.710 x 10 <sup>-21</sup> | 0.920354                 | 0.918919                 | Viral-N<NASH-N                      |
| cg11807153             | <i>VTRNA1-2</i>          | 0.951925 | 0.558453                  | 1.531 x 10 <sup>-17</sup> | 0.911504                 | 0.891892                 | Viral-N>NASH-N                      |
| cg21290290             | <i>FAM213B</i>           | 0.951925 | 0.160228                  | 2.140 x 10 <sup>-19</sup> | 0.831858                 | 0.945946                 | Viral-N<NASH-N                      |
| cg05950192             | N/A                      | 0.951208 | 0.661490                  | 3.284 x 10 <sup>-12</sup> | 0.893805                 | 0.972973                 | Viral-N>NASH-N                      |
| cg25157107             | N/A                      | 0.951082 | 0.148033                  | 1.179 x 10 <sup>-13</sup> | 0.938053                 | 0.888889                 | Viral-N<NASH-N                      |
| cg13373996             | <i>MT4</i>               | 0.951059 | 0.760037                  | 1.393 x 10 <sup>-13</sup> | 0.927928                 | 0.918919                 | Viral-N>NASH-N                      |
| cg09113046             | N/A                      | 0.950251 | 0.757781                  | 1.158 x 10 <sup>-20</sup> | 0.902655                 | 0.918919                 | Viral-N>NASH-N                      |

<sup>a</sup>Probe ID of the Infinium HumanMethylation450 BeadChip. <sup>b</sup>National Center for Biotechnology Information (NCBI) database (Genome Build 37). <sup>c</sup>The Youden index was used as a cutoff value for discriminating NASH-N samples from viral-N samples for each probe. <sup>d</sup>Sensitivity and <sup>e</sup>specificity for discrimination of NASH-N samples from Viral-N samples using individual probes. <sup>f</sup>Viral-N > NASH-N: the sample is predicted to be NASH-N when its DNA methylation level is lower than the cutoff value; Viral-N < NASH-N: the sample is predicted to be NASH-N when its DNA methylation level is higher than the cutoff value. N/A, not annotated (designed in the intergenic regions).
