# Supplementary material for: Genome-wide DNA methylation analysis during non-alcoholic steatohepatitis-related multistage hepatocarcinogenesis: comparison with hepatitis virus-related carcinogenesis
Source: PubMed Central journal article supplement — Carcinogenesis. 2017 Jan 25;38(3):261–70. doi: 10.1093/carcin/bgx005 (PMC5862314; doi:10.1093/carcin/bgx005), 2017-01-25
Supplement: bgx005_suppl_kuramoto_supplementary_table_s6_revised.pdf [file bgx005_suppl_kuramoto_supplementary_table_s6_revised.pdf]

Supplementary Table S6 Non-alcoholic steatohepatitis (NASH) specifically affected gene products included in the top 20 GO biological processes (Table 1B) and their functional annotations by MetaCore software.

| Gene symbol <sup>a</sup> | Gene ID | Infinium Probe ID <sup>b</sup> | Functional annotation by MetaCore Software                                                                                  |
|--------------------------|---------|--------------------------------|-----------------------------------------------------------------------------------------------------------------------------|
| <i>AAMDC</i>             | 28971   | cg24240077                     | Protein binding                                                                                                             |
| <i>ABCF2</i>             | 10061   | cg08499057                     | ATP binding, ATPase activity, nucleotide binding, transporter activity                                                      |
| <i>ACOT7</i>             | 11332   | cg08679807                     | Protein homodimerization activity, fatty-acyl-CoA binding                                                                   |
| <i>ADARB1</i>            | 104     | cg22226852                     | Poly(A) RNA binding <sup>d</sup> , mRNA binding <sup>d</sup>                                                                |
| <i>ADCY10</i>            | 55811   | cg09372808                     | Magnesium ion binding, manganese ion binding                                                                                |
| <i>AFF1</i>              | 4299    | cg21988461                     | Transcription factor activity, sequence-specific DNA binding <sup>c</sup>                                                   |
| <i>AFG3L2</i>            | 10939   | cg16615927                     | Metalloendopeptidase activity, unfolded protein binding                                                                     |
| <i>AGAP3</i>             | 116988  | cg02158565                     | GTP binding, GTPase activator activity                                                                                      |
| <i>AJUBA</i>             | 84962   | cg08188555,<br>cg13067221      | Chromatin binding <sup>e</sup> , actin filament binding, alpha-catenin binding, transcription corepressor activity          |
| <i>AKRIC2</i>            | 1646    | cg00863716                     | Oxidoreductase activity, carboxylic acid binding                                                                            |
| <i>ALDOA</i>             | 226     | cg16362480                     | Poly(A) RNA binding <sup>d</sup> , actin binding                                                                            |
| <i>APOM</i>              | 55937   | cg22252462                     | Phospholipid binding, lipid transporter activity                                                                            |
| <i>ARF4</i>              | 378     | cg08081407                     | GTP binding, signal transducer activity                                                                                     |
| <i>ARHGAP22</i>          | 58504   | cg03768916,<br>cg08524474      | Protein binding, GTPase activator activity                                                                                  |
| <i>ARHGEF10</i>          | 9639    | cg15164048                     | Rho guanyl-nucleotide exchange factor activity, kinesin binding                                                             |
| <i>ASB7</i>              | 140460  | cg04318546                     | Protein binding                                                                                                             |
| <i>ATG7</i>              | 22838   | cg12198254                     | Protein homodimerization activity, ubiquitin activating enzyme activity                                                     |
| <i>BAG6</i>              | 7917    | cg16500605                     | Ubiquitin protein ligase binding, Hsp70 protein binding                                                                     |
| <i>BCAR3</i>             | 8412    | cg06221222                     | Guanyl-nucleotide exchange factor activity                                                                                  |
| <i>BCAS3</i>             | 54828   | cg22435132                     | Chromatin binding <sup>e</sup> , histone binding <sup>e</sup>                                                               |
| <i>C12orf43</i>          | 64897   | cg08282784                     | Protein binding                                                                                                             |
| <i>CACNG2</i>            | 10369   | cg15606745                     | Voltage-gated calcium channel activity, ionotropic glutamate receptor binding                                               |
| <i>CDC42BPB</i>          | 9578    | cg21937244                     | Transferase activity, transferring phosphorus-containing groups, protein tyrosine kinase activity                           |
| <i>CDHR5</i>             | 53841   | cg21565415                     | Calcium ion binding, beta-catenin binding                                                                                   |
| <i>CDKN1C</i>            | 1028    | cg08206623                     | Cyclin-dependent protein serine/threonine kinase inhibitor activity                                                         |
| <i>CFLAR</i>             | 8837    | cg01779076                     | Protein complex binding, cysteine-type peptidase activity                                                                   |
| <i>CLEC2L</i>            | 154790  | cg04205664                     | Carbohydrate binding                                                                                                        |
| <i>CLK2</i>              | 1196    | cg24054272                     | Transferase activity, transferring phosphorus-containing groups, protein tyrosine kinase activity                           |
| <i>CLSTN1</i>            | 22883   | cg12856855                     | Calcium ion binding, beta-amyloid binding                                                                                   |
| <i>CTNNA1</i>            | 1495    | cg07893230                     | Poly(A) RNA binding <sup>d</sup> , actin filament binding                                                                   |
| <i>CTSZ</i>              | 1522    | cg13021192                     | Cysteine-type peptidase activity                                                                                            |
| <i>CUX1</i>              | 1523    | cg02775353                     | Sequence-specific DNA binding <sup>c</sup> , RNA polymerase II regulatory region sequence-specific DNA binding <sup>c</sup> |
| <i>DNMBP</i>             | 23268   | cg02732134                     | Rho guanyl-nucleotide exchange factor activity                                                                              |
| <i>DUSP1</i>             | 1843    | cg12333707                     | Phosphatase activity, protein tyrosine/serine/threonine phosphatase activity                                                |
| <i>EEF1D</i>             | 196549  | cg10614773                     | Signal transducer activity, translation factor activity, RNA binding <sup>d</sup>                                           |
| <i>EEF1DP3</i>           | 196549  | cg00648883                     | Protein binding, chaperone binding, translation elongation factor activity                                                  |
| <i>EFR3B</i>             | 22979   | cg01400712                     | Binding                                                                                                                     |
| <i>EGFR</i>              | 1956    | cg20706768                     | Identical protein binding, protein kinase activity                                                                          |

| Gene symbol <sup>a</sup> | Gene ID | Infinium Probe ID <sup>b</sup> | Functional annotation by MetaCore Software                                                                             |
|--------------------------|---------|--------------------------------|------------------------------------------------------------------------------------------------------------------------|
| <i>EHMT1</i>             | 79813   | cg14495033                     | Methyltransferase activity, histone-lysine N-methyltransferase activity <sup>e</sup>                                   |
| <i>EMX1</i>              | 2016    | cg15921587                     | Sequence-specific DNA binding <sup>c</sup>                                                                             |
| <i>EPHX2</i>             | 2053    | cg26725786                     | Protein homodimerization activity, hydrolase activity                                                                  |
| <i>EXOC2</i>             | 55770   | cg01870519                     | Protein kinase binding, Ral GTPase binding                                                                             |
| <i>FAM64A</i>            | 54478   | cg27248073                     | Protein binding                                                                                                        |
| <i>FAM83G</i>            | 644815  | cg26849884                     | Protein binding                                                                                                        |
| <i>FBXO18</i>            | 84893   | cg27435660                     | ATP-dependent DNA helicase activity                                                                                    |
| <i>FGF12</i>             | 2257    | cg10665123                     | Growth factor activity, ion channel binding                                                                            |
| <i>FLCN</i>              | 201163  | cg07138452                     | Protein complex binding                                                                                                |
| <i>FNDC5</i>             | 252995  | cg25364822                     | Hormone activity                                                                                                       |
| <i>FOXP3</i>             | 1112    | cg11021810                     | Transcription factor activity, sequence-specific DNA binding <sup>c</sup> , protein C-terminus binding                 |
| <i>FYTD1</i>             | 84248   | cg05788437                     | Poly(A) RNA binding <sup>d</sup> , mRNA binding <sup>d</sup>                                                           |
| <i>GARI</i>              | 54433   | cg17404403                     | Poly(A) RNA binding <sup>d</sup> , cation channel activity                                                             |
| <i>GAS7</i>              | 8522    | cg25365518                     | Transcription factor activity, sequence-specific DNA binding <sup>c</sup> , actin filament binding                     |
| <i>GCHI</i>              | 2643    | cg19502207                     | Calcium ion binding, GTP binding                                                                                       |
| <i>GMCLIP1</i>           | 64396   | cg24618378                     | Protein binding                                                                                                        |
| <i>GNG4</i>              | 2786    | cg10840412                     | Signal transducer activity                                                                                             |
| <i>GPRC5B</i>            | 51704   | cg09141413                     | G-protein coupled receptor activity, G-protein coupled receptor binding                                                |
| <i>GRAMD3</i>            | 65983   | cg02427576                     | Protein binding                                                                                                        |
| <i>GRID1</i>             | 2894    | cg04582294                     | Ionotropic glutamate receptor activity, extracellular-glutamate-gated ion channel activity                             |
| <i>GRM4</i>              | 2914    | cg04762129                     | G-protein coupled receptor activity, calcium-dependent protein binding                                                 |
| <i>GTF2H1</i>            | 2965    | cg18905668                     | Protein kinase activity, RNA polymerase II carboxy-terminal domain kinase activity, chromatin binding <sup>e</sup>     |
| <i>GYPB</i>              | 2994    | cg16636571                     | Protein binding                                                                                                        |
| <i>HAMP</i>              | 57817   | cg14554776                     | Receptor binding, ion channel inhibitor activity                                                                       |
| <i>HIVEP1</i>            | 3096    | cg11754060                     | Nucleic acid binding <sup>c</sup>                                                                                      |
| <i>HSD11B2</i>           | 3291    | cg01443318                     | Oxidoreductase activity, steroid binding                                                                               |
| <i>HTRA1</i>             | 3096    | cg03176729,<br>cg04768425      | Serine-type endopeptidase activity, insulin-like growth factor binding                                                 |
| <i>HYAL1</i>             | 3373    | cg20724227                     | Transcription factor binding, hyaluronoglucosaminidase activity                                                        |
| <i>IL20</i>              | 50604   | cg01103730                     | Cytokine activity, interleukin-20 receptor binding                                                                     |
| <i>INO80</i>             | 54617   | cg00470768                     | Actin binding, DNA helicase activity                                                                                   |
| <i>IRF7</i>              | 3665    | cg14067770                     | Transcription factor activity, sequence-specific DNA binding <sup>c</sup> , regulatory region DNA binding <sup>c</sup> |
| <i>IRS2</i>              | 8660    | cg11153485                     | Protein kinase binding, protein domain specific binding                                                                |
| <i>ITM2B</i>             | 9445    | cg14925260                     | Beta-amyloid binding                                                                                                   |
| <i>IWS1</i>              | 55677   | cg22196977                     | DNA binding <sup>c</sup> , protein binding                                                                             |
| <i>KCTD5</i>             | 54442   | cg02205746                     | Protein complex binding                                                                                                |
| <i>KIF26B</i>            | 55083   | cg22729008                     | ATPase activity, microtubule motor activity                                                                            |
| <i>KLRC3</i>             | 3823    | cg03258272                     | GTP binding, GTPase activity                                                                                           |
| <i>KLRD1</i>             | 3824    | cg05589762                     | Transmembrane signaling receptor activity, MHC class I protein complex binding                                         |
| <i>LINC00526</i>         | 147525  | cg06808467                     | Protein binding                                                                                                        |
| <i>LRP4</i>              | 4038    | cg23062006                     | Calcium ion binding, scaffold protein binding                                                                          |
| <i>LRRFIP1</i>           | 9208    | cg07797518                     | Protein homodimerization activity, double-stranded RNA binding <sup>d</sup>                                            |
| <i>MAD1L1</i>            | 8379    | cg18011078                     | Protein binding                                                                                                        |
| <i>MAPK3</i>             | 5595    | cg00192773                     | Transferase activity, transferring phosphorus-containing groups, protein tyrosine kinase activity                      |

| Gene symbol <sup>a</sup> | Gene ID   | Infinium Probe IDb | Functional annotation by MetaCore Software                                                                                                                                                                 |
|--------------------------|-----------|--------------------|------------------------------------------------------------------------------------------------------------------------------------------------------------------------------------------------------------|
| <i>MAPKAPK5</i>          | 8550      | cg20090957         | Transferase activity, transferring phosphorus-containing groups, protein tyrosine kinase activity                                                                                                          |
| <i>METRNL</i>            | 284207    | cg25270498         | Hormone activity                                                                                                                                                                                           |
| <i>MICAL3</i>            | 57553     | cg05367846         | Actin binding, Rab GTPase binding                                                                                                                                                                          |
| <i>MLLT1</i>             | 4298      | cg23084309         | DNA binding <sup>c</sup> , protein binding                                                                                                                                                                 |
| <i>MPV17L</i>            | 255027    | cg09844907         | Receptor binding                                                                                                                                                                                           |
| <i>MRAP</i>              | 56246     | cg01198024         | Type 3 melanocortin receptor binding, type 1 melanocortin receptor binding                                                                                                                                 |
| <i>MRAP2</i>             | 112609    | cg15411280         | Identical protein binding, type 4 melanocortin receptor binding                                                                                                                                            |
| <i>MRGBP</i>             | 55257     | cg21407906         | Protein binding                                                                                                                                                                                            |
| <i>MRPL22</i>            | 29093     | cg17462962         | Poly(A) RNA binding <sup>d</sup> , structural constituent of ribosome                                                                                                                                      |
| <i>MRPS24</i>            | 64951     | cg11213199         | Poly(A) RNA binding <sup>d</sup> , structural constituent of ribosome                                                                                                                                      |
| <i>MSX1</i>              | 4487      | cg01959412         | Sequence-specific DNA binding <sup>c</sup> , p53 binding                                                                                                                                                   |
| <i>MT4</i>               | 84560     | cg13373996         | Metal ion binding                                                                                                                                                                                          |
| <i>MYO7A</i>             | 4647      | cg26952188         | Protein homodimerization activity, protein domain specific binding                                                                                                                                         |
| <i>MYT1L</i>             | 23040     | cg04449562         | Transcription factor activity, sequence-specific DNA binding <sup>c</sup>                                                                                                                                  |
| <i>NADK</i>              | 65220     | cg02280859         | NAD+ kinase activity                                                                                                                                                                                       |
| <i>NCAPH2</i>            | 29781     | cg25152348         | Protein binding                                                                                                                                                                                            |
| <i>NEO1</i>              | 4756      | cg15888301         | Neceptor activity, cadherin binding                                                                                                                                                                        |
| <i>NFRKB</i>             | 4798      | cg14319842         | DNA binding <sup>c</sup> , protease binding                                                                                                                                                                |
| <i>NKX6-2</i>            | 84504     | cg06082548         | Transcription factor activity, sequence-specific DNA binding <sup>c</sup>                                                                                                                                  |
| <i>NOTCH1</i>            | 4851      | cg13659914         | Transcription factor activity, sequence-specific DNA binding <sup>c</sup>                                                                                                                                  |
| <i>NQO2</i>              | 4835      | cg09741240         | Oxidoreductase activity, NADPH dehydrogenase (quinone) activity                                                                                                                                            |
| <i>OASI</i>              | 4938      | cg04951822         | RNA binding <sup>d</sup> , transferase activity                                                                                                                                                            |
| <i>OBSCN</i>             | 84033     | cg25622855         | Transferase activity, transferring phosphorus-containing groups, protein tyrosine kinase activity.                                                                                                         |
| <i>PCDH9</i>             | 5101      | cg13473086         | Calcium ion binding                                                                                                                                                                                        |
| <i>PCNT</i>              | 5116      | cg05998816         | Calmodulin binding                                                                                                                                                                                         |
| <i>PEX10</i>             | 5192      | cg05461259         | Protein C-terminus binding.                                                                                                                                                                                |
| <i>PGS1</i>              | 9489      | cg22290140         | Calcium ion binding, CDP-diacylglycerol-glycerol-3-phosphate 3-phosphatidyltransferase activity                                                                                                            |
| <i>PHF13</i>             | 148479    | cg02900253         | Chromatin binding <sup>e</sup> , methylated histone binding <sup>e</sup>                                                                                                                                   |
| <i>PHIP</i>              | 55023     | cg11227604         | Insulin receptor binding, lysine-acetylated histone binding <sup>e</sup>                                                                                                                                   |
| <i>PKP4</i>              | 8502      | cg13896783         | Binding                                                                                                                                                                                                    |
| <i>PLAG1</i>             | 5324      | cg01994308         | Transcription factor activity, sequence-specific DNA binding <sup>c</sup> , transcriptional activator activity, RNA polymerase II core promoter proximal region sequence-specific DNA binding <sup>c</sup> |
| <i>PLEKHO2</i>           | 80301     | cg07467323         |                                                                                                                                                                                                            |
| <i>PMPCA</i>             | 23203     | cg13560760         | Metalloendopeptidase activity                                                                                                                                                                              |
| <i>PODXL</i>             | 5420      | cg02051077         | Protein binding                                                                                                                                                                                            |
| <i>POM121C</i>           | 100101267 | cg23472171         | Protein binding                                                                                                                                                                                            |
| <i>PPP1R8</i>            | 5511      | cg08857906         | RNA binding <sup>d</sup> , protein phosphatase type 1 regulator activity                                                                                                                                   |
| <i>PPP2R2C</i>           | 5522      | cg11158902         | Protein phosphatase type 2A regulator activity                                                                                                                                                             |
| <i>PPP2R5C</i>           | 5527      | cg08163906         | Binding, protein phosphatase type 2A regulator activity                                                                                                                                                    |
| <i>PRAMI</i>             | 84106     | cg09112613         | Lipid binding                                                                                                                                                                                              |
| <i>PRDM4</i>             | 11108     | cg03909902         | Death receptor binding, DNA binding <sup>c</sup> , histone methyltransferase activity <sup>e</sup>                                                                                                         |
| <i>PRKAG2</i>            | 51422     | cg13810766         | Protein kinase binding, protein kinase activator activity                                                                                                                                                  |
| <i>PRKCE</i>             | 5581      | cg04035064         | Transferase activity, transferring phosphorus-containing groups, protein tyrosine kinase activity                                                                                                          |

| Gene symbol <sup>a</sup> | Gene ID | Infinium Probe ID <sup>b</sup> | Functional annotation by MetaCore Software                                                                                                                      |
|--------------------------|---------|--------------------------------|-----------------------------------------------------------------------------------------------------------------------------------------------------------------|
| <i>PRKDC</i>             | 5591    | cg12445378                     | Poly(A) RNA binding <sup>d</sup> , protein kinase activity                                                                                                      |
| <i>PSMF1</i>             | 9491    | cg14398557                     | Endopeptidase inhibitor activity, proteasome binding                                                                                                            |
| <i>RAD51B</i>            | 5890    | cg11036936                     | Nucleotide binding <sup>c</sup> , single-stranded DNA binding <sup>c</sup>                                                                                      |
| <i>RALGDS</i>            | 5900    | cg13471932                     | Guanyl-nucleotide exchange factor activity, GTPase regulator activity                                                                                           |
| <i>RANBP1</i>            | 5902    | cg18631743                     | GTPase activator activity, GDP-dissociation inhibitor activity                                                                                                  |
| <i>RAP1B</i>             | 5908    | cg00236302                     | GTP binding, protein complex binding                                                                                                                            |
| <i>RASA2</i>             | 5922    | cg10757852                     | GTPase activator activity                                                                                                                                       |
| <i>RASGRP3</i>           | 25780   | cg06971903                     | Calcium ion binding, GTPase activator activity                                                                                                                  |
| <i>RASSF3</i>            | 283349  | cg00771490                     | Identical protein binding                                                                                                                                       |
| <i>RBFA</i>              | 79863   | cg20390253                     | Protein binding                                                                                                                                                 |
| <i>RBPJ</i>              | 3516    | cg21843114                     | Transcription factor activity, sequence-specific DNA binding <sup>c</sup> , chromatin binding <sup>c</sup>                                                      |
| <i>RCOR1</i>             | 23186   | cg08707819                     | Chromatin binding <sup>e</sup> , transcriptional repressor activity, RNA polymerase II core promoter proximal region sequence-specific DNA binding <sup>c</sup> |
| <i>REXO1</i>             | 57455   | cg25538450                     | Nucleic acid binding <sup>d</sup> , exonuclease activity <sup>d</sup>                                                                                           |
| <i>RGS6</i>              | 9628    | cg01775802                     | Signal transducer activity, protein domain specific binding                                                                                                     |
| <i>RPH3AL</i>            | 9501    | cg03321231                     | Calcium ion binding, syntaxin binding                                                                                                                           |
| <i>RPS6KA2</i>           | 6196    | cg23954724<br>cg25512188       | Transferase activity, transferring phosphorus-containing groups, protein tyrosine kinase activity                                                               |
| <i>RTF1</i>              | 91869   | cg06183256                     | Poly(A) RNA binding <sup>d</sup> , single-stranded DNA binding <sup>c</sup>                                                                                     |
| <i>SAMD4A</i>            | 23034   | cg07449447                     | Poly(A) RNA binding <sup>d</sup> , translation repressor activity                                                                                               |
| <i>SBF1</i>              | 6305    | cg20769334                     | Phosphatase activity, Rab guanyl-nucleotide exchange factor activity                                                                                            |
| <i>SCARB1</i>            | 949     | cg19358664                     | Protein homodimerization activity, phosphatidylserine binding                                                                                                   |
| <i>SERPINA12</i>         | 145264  | cg19904425                     | Serine-type endopeptidase inhibitor activity                                                                                                                    |
| <i>SGTB</i>              | 54557   | cg06708122                     | Protein binding                                                                                                                                                 |
| <i>SKI</i>               | 6497    | cg01881525                     | Chromatin binding <sup>e</sup> , ubiquitin protein ligase binding                                                                                               |
| <i>SMAD3</i>             | 4088    | cg07576222                     | Transcription factor activity, sequence-specific DNA binding <sup>b</sup>                                                                                       |
| <i>SORCS2</i>            | 57537   | cg16571794                     | Neuropeptide receptor activity                                                                                                                                  |
| <i>SP2</i>               | 6668    | cg06437144                     | RNA polymerase II transcription factor activity, sequence-specific DNA binding <sup>c</sup> , histone deacetylase binding <sup>e</sup>                          |
| <i>SPG7</i>              | 6687    | cg12774921                     | ATPase activity, metalloendopeptidase activity                                                                                                                  |
| <i>SPIRE2</i>            | 84501   | cg07959380                     | Actin binding                                                                                                                                                   |
| <i>SPTBN5</i>            | 51332   | cg02852238                     | Actin binding, kinesin binding                                                                                                                                  |
| <i>SUPT3H</i>            | 8464    | cg14047339                     | Protein heterodimerization activity, histone acetyltransferase activity <sup>e</sup>                                                                            |
| <i>SVIL</i>              | 6840    | cg17428896                     | Actin binding, actin filament binding                                                                                                                           |
| <i>SYNPO</i>             | 11346   | cg05714559                     | Actin binding                                                                                                                                                   |
| <i>SYNPO2L</i>           | 79933   | cg09521743                     | Actin binding                                                                                                                                                   |
| <i>TESC</i>              | 54997   | cg01073178                     | Calcium ion binding, magnesium ion binding                                                                                                                      |
| <i>TNXB</i>              | 7148    | cg14263351                     | Heparin binding, collagen binding                                                                                                                               |
| <i>TRAPPC10</i>          | 7109    | cg11381792                     | Sodium ion transmembr, transporter activity                                                                                                                     |
| <i>TRIM71</i>            | 131405  | cg21654379                     | Ligase activity, miRNA binding <sup>d</sup>                                                                                                                     |
| <i>TRIO</i>              | 7204    | cg08650290                     | Transferase activity, transferring phosphorus-containing groups, protein tyrosine kinase activity                                                               |
| <i>TRPV4</i>             | 59341   | cg08114617                     | Protein kinase binding, microtubule binding                                                                                                                     |
| <i>TTC39B</i>            | 158219  | cg14288292                     | Protein binding                                                                                                                                                 |
| <i>TTR</i>               | 7276    | cg18038361                     | Identical protein binding, hormone activity                                                                                                                     |
| <i>UBE3C</i>             | 9690    | cg15470736                     | Ligase activity, ubiquitin-protein transferase activity                                                                                                         |
| <i>UNC45A</i>            | 55898   | cg13417485                     | Binding, Hsp90 protein binding                                                                                                                                  |

| Gene symbol <sup>a</sup> | Gene ID | Infinium Probe ID <sup>b</sup> | Functional annotation by MetaCore Software                                                                                     |
|--------------------------|---------|--------------------------------|--------------------------------------------------------------------------------------------------------------------------------|
| <i>UNG</i>               | 7374    | cg20982606                     | Uracil DNA N-glycosylase activity <sup>c</sup>                                                                                 |
| <i>VAC14</i>             | 55697   | cg04458219                     | Binding, receptor activity                                                                                                     |
| <i>VAX2</i>              | 25806   | cg19015611                     | Transcription factor activity, sequence-specific DNA binding <sup>c</sup> , chromatin DNA binding <sup>c</sup>                 |
| <i>VWF</i>               | 7450    | cg25884442                     | Protein homodimerization activity, integrin binding                                                                            |
| <i>VWA2</i>              | 340706  | cg01320048                     | Calcium ion binding, identical protein binding                                                                                 |
| <i>WDR6</i>              | 11180   | cg13003239                     | Poly(A) RNA binding <sup>d</sup> , insulin receptor substrate binding                                                          |
| <i>WHSC1</i>             | 7468    | cg03150409                     | Sequence-specific DNA binding <sup>c</sup> , histone-lysine N-methyltransferase activity <sup>e</sup>                          |
| <i>ZBTB46</i>            | 140685  | cg01573175                     | Nucleic acid binding                                                                                                           |
| <i>ZBTB7A</i>            | 51341   | cg14679780                     | Histone acetyltransferase binding <sup>c</sup>                                                                                 |
| <i>ZC3H14</i>            | 79882   | cg03468541                     | Poly(A) RNA binding <sup>d</sup> , RNA binding <sup>d</sup>                                                                    |
| <i>ZCCHC24</i>           | 219654  | cg02510736                     | Nucleic acid binding <sup>d</sup> , poly(A) RNA binding <sup>d</sup>                                                           |
| <i>ZNF268</i>            | 10795   | cg07159286                     | Nucleic acid binding <sup>c</sup> , transcription factor activity, sequence-specific DNA binding <sup>c</sup>                  |
| <i>ZNF28</i>             | 7576    | cg07738077                     | Phosphatidylinositol-3-phosphate binding                                                                                       |
| <i>ZNF280B</i>           | 140883  | cg04971769                     |                                                                                                                                |
| <i>ZNF311</i>            | 282890  | cg19513374,<br>cg20235510      | Nucleic acid binding <sup>c</sup> , transcription factor activity, sequence-specific DNA binding <sup>c</sup>                  |
| <i>ZNF425</i>            | 155054  | cg25009327                     | Nucleic acid binding <sup>c</sup>                                                                                              |
| <i>ZNF708</i>            | 7562    | cg04364726                     | Nucleic acid binding <sup>c</sup>                                                                                              |
| <i>ZNF827</i>            | 152485  | cg07661849                     | Nucleic acid binding <sup>c</sup>                                                                                              |
| <i>ZNF876P</i>           | 642280  | cg17030981                     | Nucleic acid binding <sup>c</sup> , RNA polymerase II core promoter proximal region sequence-specific DNA binding <sup>c</sup> |
| <i>ZP3</i>               | 7784    | cg01219670                     | Signal transducer activity, store-operated calcium channel activity                                                            |
| <i>ZZEF1</i>             | 23140   | cg19105961                     | Calcium ion binding                                                                                                            |

<sup>a</sup>National Center for Biotechnology Information (NCBI) database (Genome Build 37). <sup>b</sup>Probe ID of the Infinium HumanMethylation450 BeadChip. <sup>c</sup>31 genes encoding DNA binding proteins. <sup>d</sup>19 genes encoding RNA binding proteins. <sup>e</sup>15 genes encoding chromatin regulators.
