# Supplementary material for: Genome-wide DNA methylation analysis during non-alcoholic steatohepatitis-related multistage hepatocarcinogenesis: comparison with hepatitis virus-related carcinogenesis
Source: PubMed Central journal article supplement — Carcinogenesis. 2017 Jan 25;38(3):261–70. doi: 10.1093/carcin/bgx005 (PMC5862314; doi:10.1093/carcin/bgx005), 2017-01-25
Supplement: bgx005_suppl_kuramoto_supplementary_table_s7_revised.pdf [file bgx005_suppl_kuramoto_supplementary_table_s7_revised.pdf]

Supplementary Table S7 All 163 statistically significant pathway maps, in which the 265 genes showing non-alcoholic steatohepatitis-specific DNA methylation alterations were significantly ( $P < 0.05$ ) accumulated, revealed by MetaCore software analysis.

| Pathway maps                                                                                                            | <i>P</i> value           |
|-------------------------------------------------------------------------------------------------------------------------|--------------------------|
| Development_NOTCH-induced EMT                                                                                           | 1.408 x 10 <sup>-7</sup> |
| Development_Notch Signaling Pathway                                                                                     | 1.027 x 10 <sup>-5</sup> |
| Development_NOTCH1-mediated pathway for NF-KB activity modulation                                                       | 2.699 x 10 <sup>-5</sup> |
| Development_Gastrin in cell growth and proliferation                                                                    | 6.243 x 10 <sup>-5</sup> |
| Oxidative stress_ROS-mediated activation of MAPK via inhibition of phosphatases                                         | 8.034 x 10 <sup>-4</sup> |
| Development_EGFR signaling pathway                                                                                      | 1.198 x 10 <sup>-4</sup> |
| Development_Thromboxane A2 signaling pathway                                                                            | 3.674 x 10 <sup>-4</sup> |
| Development_Oligodendrocyte differentiation from adult stem cells                                                       | 3.967 x 10 <sup>-4</sup> |
| Immune response_T regulatory cell-mediated modulation of effector T cell and NK cell functions                          | 4.600 x 10 <sup>-4</sup> |
| Development_Mu-type opioid receptor signaling via Beta-arrestin                                                         | 5.635 x 10 <sup>-4</sup> |
| G-protein signaling_M-RAS regulation pathway                                                                            | 5.635 x 10 <sup>-4</sup> |
| Development_Keratinocyte differentiation                                                                                | 5.682 x 10 <sup>-4</sup> |
| G-protein signaling_TC21 regulation pathway                                                                             | 6.372 x 10 <sup>-4</sup> |
| G-protein signaling_R-RAS regulation pathway                                                                            | 6.372 x 10 <sup>-4</sup> |
| Neurogenesis_NGF/ TrkA MAPK-mediated signaling                                                                          | 7.426 x 10 <sup>-4</sup> |
| Development_Mu-type opioid receptor regulation of proliferation                                                         | 8.944 x 10 <sup>-4</sup> |
| Immune response_Sublytic effects of membrane attack complex                                                             | 1.185 x 10 <sup>-3</sup> |
| Development_Positive regulation of STK3/4 (Hippo) pathway and negative regulation of YAP/TAZ function                   | 1.320 x 10 <sup>-3</sup> |
| Signal transduction_ERK1/2 signaling pathway                                                                            | 1.328 x 10 <sup>-3</sup> |
| Reproduction_Gonadotropin-releasing hormone (GnRH) signaling                                                            | 1.466 x 10 <sup>-3</sup> |
| Development_Epigenetic and transcriptional regulation of oligodendrocyte precursor cell differentiation and myelination | 1.586 x 10 <sup>-3</sup> |
| Signal transduction_Erk Interactions: Inhibition of Erk                                                                 | 1.586 x 10 <sup>-3</sup> |
| Development_SIP1 receptor signaling via beta-arrestin                                                                   | 1.586 x 10 <sup>-3</sup> |
| Development_Transcriptional regulation of megakaryopoiesis                                                              | 1.727 x 10 <sup>-3</sup> |
| Role of growth factor receptors transactivation by Hyaluronic acid / CD44 signaling in tumor progression                | 1.727 x 10 <sup>-3</sup> |
| Nociception_Nociceptin receptor signaling                                                                               | 1.791 x 10 <sup>-3</sup> |
| HBV signaling via protein kinases leading to HCC                                                                        | 1.875 x 10 <sup>-3</sup> |
| Role of red blood cell adhesion to endothelium in vaso-occlusion in Sickle cell disease                                 | 2.030 x 10 <sup>-3</sup> |
| Development_Beta-adrenergic receptors transactivation of EGFR                                                           | 2.030 x 10 <sup>-3</sup> |
| Immune response_Role of integrins in NK cells cytotoxicity                                                              | 2.193 x 10 <sup>-3</sup> |
| Development_Gastrin in differentiation of the gastric mucosa                                                            | 2.193 x 10 <sup>-3</sup> |
| Translation_Regulation of EIF2 activity                                                                                 | 2.364 x 10 <sup>-3</sup> |
| Apoptosis and survival_BAD phosphorylation                                                                              | 2.927 x 10 <sup>-3</sup> |
| Development_ACM2 and ACM4 activation of ERK                                                                             | 3.131 x 10 <sup>-3</sup> |
| Regulation of Tissue factor signaling in cancer                                                                         | 3.131 x 10 <sup>-3</sup> |
| K-RAS signaling in pancreatic cancer                                                                                    | 3.344 x 10 <sup>-3</sup> |
| Development_Activation of Erk by ACM1, ACM3 and ACM5                                                                    | 3.344 x 10 <sup>-3</sup> |
| Influence of smoking on activation of EGFR signaling in lung cancer cells                                               | 3.344 x 10 <sup>-3</sup> |
| Cytoskeleton remodeling_RalB regulation pathway                                                                         | 3.445 x 10 <sup>-3</sup> |
| Development_Ligand-independent activation of ESR1 and ESR2                                                              | 3.565 x 10 <sup>-3</sup> |
| Development_G-protein-mediated regulation of MAPK-ERK signaling                                                         | 3.796 x 10 <sup>-3</sup> |
| Signal transduction_PTMs in IL-17-induced CIKS-independent signaling pathways                                           | 3.796 x 10 <sup>-3</sup> |
| Development_PEDF signaling                                                                                              | 4.540 x 10 <sup>-3</sup> |

| Pathway maps                                                                                             | <i>P</i> value           |
|----------------------------------------------------------------------------------------------------------|--------------------------|
| Role and regulation of Prostaglandin E2 in gastric cancer                                                | 4.540 x 10 <sup>-3</sup> |
| Development_EDNRB signaling                                                                              | 4.806 x 10 <sup>-3</sup> |
| Immune response_C5a signaling                                                                            | 4.806 x 10 <sup>-3</sup> |
| Development_TGF-beta receptor signaling                                                                  | 4.806 x 10 <sup>-3</sup> |
| Immune response_IL-13 signaling via PI3K-ERK pathway                                                     | 4.806 x 10 <sup>-3</sup> |
| Development_IGF-1 receptor signaling                                                                     | 5.367 x 10 <sup>-3</sup> |
| Immune response_Role of DAP12 receptors in NK cells                                                      | 6.279 x 10 <sup>-3</sup> |
| Aberrant B-Raf signaling in melanoma progression                                                         | 6.279 x 10 <sup>-3</sup> |
| Aberrant production of IL-2 and IL-17 in SLE T cells                                                     | 7.278 x 10 <sup>-3</sup> |
| Oxidative stress_Activation of NADPH oxidase                                                             | 7.631 x 10 <sup>-3</sup> |
| IGF family signaling in colorectal cancer                                                                | 7.993 x 10 <sup>-3</sup> |
| Development_Thyroliberin signaling                                                                       | 7.993 x 10 <sup>-3</sup> |
| Glucocorticoid-induced elevation of intraocular pressure as glaucoma risk factor                         | 8.749 x 10 <sup>-3</sup> |
| Muscle contraction_Oxytocin signaling in uterus and mammary gland                                        | 8.749 x 10 <sup>-3</sup> |
| Development_Alpha-2 adrenergic receptor activation of ERK                                                | 8.749 x 10 <sup>-3</sup> |
| Development_Negative regulation of STK3/4 (Hippo) pathway and positive regulation of YAP/TAZ function    | 8.749 x 10 <sup>-3</sup> |
| Immune response_IL-15 signaling                                                                          | 9.142 x 10 <sup>-3</sup> |
| Transport_Macropinocytosis regulation by growth factors                                                  | 9.142 x 10 <sup>-3</sup> |
| Transcription_Sirtuin6 regulation and functions                                                          | 9.545 x 10 <sup>-3</sup> |
| Role of Tissue factor-induced Thrombin signaling in cancerogenesis                                       | 1.038 x 10 <sup>-2</sup> |
| Development_EGFR signaling via PIP3                                                                      | 1.069 x 10 <sup>-2</sup> |
| Development_Growth factors in regulation of oligodendrocyte precursor cell proliferation                 | 1.082 x 10 <sup>-2</sup> |
| Ligand-independent activation of Androgen receptor in Prostate Cancer                                    | 1.082 x 10 <sup>-2</sup> |
| Development_Dopamine D2 receptor transactivation of EGFR                                                 | 1.161 x 10 <sup>-2</sup> |
| Development_GDNF signaling                                                                               | 1.161 x 10 <sup>-2</sup> |
| Mucin expression in CF airways                                                                           | 1.172 x 10 <sup>-2</sup> |
| Immune response_Gastrin in inflammatory response                                                         | 1.172 x 10 <sup>-2</sup> |
| G-protein signaling_K-RAS regulation pathway                                                             | 1.257 x 10 <sup>-2</sup> |
| Apoptosis and survival_Apoptotic Activin A signaling                                                     | 1.257 x 10 <sup>-2</sup> |
| Transcription_Transcription regulation of aminoacid metabolism                                           | 1.257 x 10 <sup>-2</sup> |
| Signal transduction_mTORC1 upstream signaling                                                            | 1.266 x 10 <sup>-2</sup> |
| Neurophysiological process_Dopamine D2 receptor transactivation of PDGFR in CNS                          | 1.356 x 10 <sup>-2</sup> |
| Cell adhesion_Endothelial cell contacts by junctional mechanisms                                         | 1.356 x 10 <sup>-2</sup> |
| HCV-dependent regulation of membrane receptors signaling in HCC                                          | 1.458 x 10 <sup>-2</sup> |
| Platelet activation during ADAM-TS13-deficient thrombotic microangiopathy development                    | 1.563 x 10 <sup>-2</sup> |
| Development_Delta-type opioid receptor signaling via G-protein alpha-14                                  | 1.563 x 10 <sup>-2</sup> |
| Neurophysiological process_NMDA-dependent postsynaptic long-term potentiation in CA1 hippocampal neurons | 1.742 x 10 <sup>-2</sup> |
| Colorectal cancer (general schema)                                                                       | 1.783 x 10 <sup>-2</sup> |
| Cytoskeleton remodeling_RalA regulation pathway                                                          | 1.783 x 10 <sup>-2</sup> |
| NETosis in SLE                                                                                           | 1.897 x 10 <sup>-2</sup> |
| Development_Transactivation of PDGFR in non-neuronal cells by Dopamine D2 receptor                       | 1.897 x 10 <sup>-2</sup> |
| Development_VEGF signaling via VEGFR2 - generic cascades                                                 | 1.982 x 10 <sup>-2</sup> |
| Development_Angiotensin activation of ERK                                                                | 2.136 x 10 <sup>-2</sup> |
| Development_EGFR signaling via small GTPases                                                             | 2.136 x 10 <sup>-2</sup> |
| G-protein signaling_N-RAS regulation pathway                                                             | 2.136 x 10 <sup>-2</sup> |
| Signal transduction_Activin A signaling regulation                                                       | 2.136 x 10 <sup>-2</sup> |
| Development_HGF-dependent inhibition of TGF-beta-induced EMT                                             | 2.259 x 10 <sup>-2</sup> |

| Pathway maps                                                                             | <i>P</i> value           |
|------------------------------------------------------------------------------------------|--------------------------|
| Role of Tissue factor in cancer independent of coagulation protease signaling            | 2.386 x 10 <sup>-2</sup> |
| Immune response_Oncostatin M signaling via MAPK in mouse cells                           | 2.386 x 10 <sup>-2</sup> |
| Development_TGF-beta-dependent induction of EMT via SMADs                                | 2.386 x 10 <sup>-2</sup> |
| Immune response_IL-9 signaling pathway                                                   | 2.515 x 10 <sup>-2</sup> |
| G-protein signaling_G-Protein alpha-12 signaling pathway                                 | 2.647 x 10 <sup>-2</sup> |
| Immune response_Oncostatin M signaling via MAPK in human cells                           | 2.647 x 10 <sup>-2</sup> |
| Transcription_CoREST complex-mediated epigenetic gene silencing                          | 2.647 x 10 <sup>-2</sup> |
| G-protein signaling_H-RAS regulation pathway                                             | 2.647 x 10 <sup>-2</sup> |
| Development_Delta-type opioid receptor mediated cardioprotection                         | 2.647 x 10 <sup>-2</sup> |
| Immune response_IL-4 signaling pathway                                                   | 2.657 x 10 <sup>-2</sup> |
| Transcription_Role of AP-1 in regulation of cellular metabolism                          | 2.782 x 10 <sup>-2</sup> |
| Cell cycle_Regulation of G1/S transition (part 1)                                        | 2.782 x 10 <sup>-2</sup> |
| Apoptosis and survival_Anti-apoptotic action of membrane-bound ESR1                      | 2.782 x 10 <sup>-2</sup> |
| Development_ERBB-family signaling                                                        | 2.920 x 10 <sup>-2</sup> |
| Transcription_Receptor-mediated HIF regulation                                           | 2.920 x 10 <sup>-2</sup> |
| Complement pathway disruption in thrombotic microangiopathy                              | 2.920 x 10 <sup>-2</sup> |
| Cell adhesion_PLAU signaling                                                             | 2.920 x 10 <sup>-2</sup> |
| G-protein signaling_Rap1A regulation pathway                                             | 3.060 x 10 <sup>-2</sup> |
| Main growth factor signaling cascades in multiple myeloma cells                          | 3.203 x 10 <sup>-2</sup> |
| Neurophysiological process_Netrin-1 in regulation of axon guidance                       | 3.203 x 10 <sup>-2</sup> |
| Development_Regulation of lung epithelial progenitor cell differentiation                | 3.203 x 10 <sup>-2</sup> |
| Androstenedione and testosterone biosynthesis and metabolism p.3                         | 3.203 x 10 <sup>-2</sup> |
| Breast cancer (general schema)                                                           | 3.203 x 10 <sup>-2</sup> |
| Immune response_IL-3 signaling via ERK and PI3K                                          | 3.275 x 10 <sup>-2</sup> |
| Cytoskeleton remodeling_Cytoskeleton remodeling                                          | 3.275 x 10 <sup>-2</sup> |
| Translation_Insulin regulation of translation                                            | 3.348 x 10 <sup>-2</sup> |
| Development_Angiotensin signaling via PYK2                                               | 3.496 x 10 <sup>-2</sup> |
| Immune response_Substance P-stimulated expression of proinflammatory cytokines via MAPKs | 3.496 x 10 <sup>-2</sup> |
| Apoptosis and survival_TNF-alpha-induced Caspase-8 signaling                             | 3.496 x 10 <sup>-2</sup> |
| Development_Adenosine A2A receptor signaling                                             | 3.496 x 10 <sup>-2</sup> |
| Development_VEGF signaling and activation                                                | 3.496 x 10 <sup>-2</sup> |
| Development_Flt3 signaling                                                               | 3.647 x 10 <sup>-2</sup> |
| Androstenedione and testosterone biosynthesis and metabolism p.3/ Rodent version         | 3.647 x 10 <sup>-2</sup> |
| Role of alpha-6/beta-4 integrins in carcinoma progression                                | 3.800 x 10 <sup>-2</sup> |
| Development_EPO-induced MAPK pathway                                                     | 3.800 x 10 <sup>-2</sup> |
| Transcription_Androgen Receptor nuclear signaling                                        | 3.800 x 10 <sup>-2</sup> |
| Development_Thrombopoietin-regulated cell processes                                      | 3.800 x 10 <sup>-2</sup> |
| Development_Activation of ERK by Alpha-1 adrenergic receptors                            | 3.800 x 10 <sup>-2</sup> |
| High shear stress-induced platelet activation                                            | 3.955 x 10 <sup>-2</sup> |
| Immune response_MIF-induced cell adhesion, migration and angiogenesis                    | 3.955 x 10 <sup>-2</sup> |
| Development_GDNF family signaling                                                        | 3.955 x 10 <sup>-2</sup> |
| Development_Endothelin-1/EDNRA transactivation of EGFR                                   | 3.955 x 10 <sup>-2</sup> |
| Immune response_MIF - the neuroendocrine-macrophage connector                            | 3.955 x 10 <sup>-2</sup> |
| Regulation of GSK3 beta in bipolar disorder                                              | 3.955 x 10 <sup>-2</sup> |
| Signal transduction_PTEN pathway                                                         | 3.955 x 10 <sup>-2</sup> |
| FGF signaling in pancreatic cancer                                                       | 3.955 x 10 <sup>-2</sup> |
| Androgen receptor activation and downstream signaling in Prostate cancer                 | 3.955 x 10 <sup>-2</sup> |

| Pathway maps                                                                | <i>P</i> value           |
|-----------------------------------------------------------------------------|--------------------------|
| Cytoskeleton remodeling_TGF, WNT and cytoskeletal remodeling                | 4.052 x 10 <sup>-2</sup> |
| 8Neurophysiological process_Circadian rhythm                                | 4.113 x 10 <sup>-2</sup> |
| Development_Leptin signaling via PI3K-dependent pathway                     | 4.113 x 10 <sup>-2</sup> |
| Immune response_PGE2 common pathways                                        | 4.113 x 10 <sup>-2</sup> |
| Regulation of lipid metabolism_Insulin signaling: generic cascades          | 4.113 x 10 <sup>-2</sup> |
| Development_PDGF signaling via MAPK cascades                                | 4.113 x 10 <sup>-2</sup> |
| Stimulation of TGF-beta signaling in lung cancer                            | 4.273 x 10 <sup>-2</sup> |
| Muscle contraction_Relaxin signaling pathway                                | 4.273 x 10 <sup>-2</sup> |
| Immune response_TLR5, TLR7, TLR8 and TLR9 signaling pathways                | 4.273 x 10 <sup>-2</sup> |
| Oxidative stress_Role of IL-8 signaling pathway in respiratory burst        | 4.273 x 10 <sup>-2</sup> |
| Transcription_CREB signaling pathway                                        | 4.436 x 10 <sup>-2</sup> |
| Immune response_IL-2 activation and signaling pathway                       | 4.436 x 10 <sup>-2</sup> |
| Development_Adenosine A3 receptor signaling                                 | 4.436 x 10 <sup>-2</sup> |
| Signal transduction_IP3 signaling                                           | 4.436 x 10 <sup>-2</sup> |
| Cytoskeleton remodeling_Integrin outside-in signaling                       | 4.436 x 10 <sup>-2</sup> |
| Tissue Factor signaling in cancer via PAR1 and PAR2                         | 4.436 x 10 <sup>-2</sup> |
| Apoptosis and survival_HTR1A signaling                                      | 4.601 x 10 <sup>-2</sup> |
| Development_Adenosine A2B receptor signaling                                | 4.601 x 10 <sup>-2</sup> |
| Signal transduction_PKA signaling                                           | 4.768 x 10 <sup>-2</sup> |
| Cortisone biosynthesis and metabolism                                       | 4.768 x 10 <sup>-2</sup> |
| Signal transduction_PTMs in BAFF-induced signaling                          | 4.768 x 10 <sup>-2</sup> |
| Development_Insulin, IGF-1 and TNF-alpha in brown adipocyte differentiation | 4.937 x 10 <sup>-2</sup> |
| Signal transduction_Activation of PKC via G-Protein coupled receptor        | 4.937 x 10 <sup>-2</sup> |
| G-protein signaling_Proinsulin C-peptide signaling                          | 4.937 x 10 <sup>-2</sup> |
| Development_FGF-family signaling                                            | 4.937 x 10 <sup>-2</sup> |
| Immune response_Antiviral actions of Interferons                            | 4.937 x 10 <sup>-2</sup> |
