# Supplementary material for: Genome-wide DNA methylation analysis during non-alcoholic steatohepatitis-related multistage hepatocarcinogenesis: comparison with hepatitis virus-related carcinogenesis
Source: PubMed Central journal article supplement — Carcinogenesis. 2017 Jan 25;38(3):261–70. doi: 10.1093/carcin/bgx005 (PMC5862314; doi:10.1093/carcin/bgx005), 2017-01-25
Supplement: bgx005_suppl_kuramoto_supplementary_table_s8_revised_ver2.pdf [file bgx005_suppl_kuramoto_supplementary_table_s8_revised_ver2.pdf]

Supplementary Table S8 The 80 probes (70 genes) that were included among the non-alcoholic steatohepatitis (NASH) specifically affected probes whose DNA methylation alterations were inherited by or strengthened in NASH-related hepatocellular carcinoma (NASH-T) samples (Jonckheere-Terpstra trend test) and that showed significant differences in DNA methylation levels even between NASH-T samples and hepatitis virus-related hepatocellular carcinoma (viral-T) samples.

| Target ID <sup>a</sup> | Chromosome | Gene symbol <sup>b</sup> | DNA methylation levels (mean±SD) |                |                           |
|------------------------|------------|--------------------------|----------------------------------|----------------|---------------------------|
|                        |            |                          | NASH-T (n=22)                    | Viral-T (n=37) | P (Welch's <i>t</i> test) |
| cg08679807             | 1          | <i>ACOT7</i>             | 0.673±0.039                      | 0.769±0.054    | 8.450x10 <sup>-5</sup>    |
| cg10555853             | 1          | N/A                      | 0.525±0.050                      | 0.439±0.041    | 2.281x10 <sup>-2</sup>    |
| cg23108607             | 1          | <i>KIAA0754</i>          | 0.675±0.051                      | 0.767±0.054    | 2.487x10 <sup>-2</sup>    |
| cg19777710             | 1          | <i>AKR7A2P1</i>          | 0.681±0.037                      | 0.753±0.050    | 2.868x10 <sup>-2</sup>    |
| cg01815906             | 1          | <i>SMYD3</i>             | 0.677±0.035                      | 0.759±0.052    | 8.411x10 <sup>-4</sup>    |
| cg26534993             | 2          | <i>TSSC1</i>             | 0.499±0.040                      | 0.594±0.058    | 4.734x10 <sup>-4</sup>    |
| cg10328259             | 2          | <i>TSSC1</i>             | 0.678±0.043                      | 0.794±0.068    | 3.380x10 <sup>-5</sup>    |
| cg01400712             | 2          | <i>EFR3B</i>             | 0.485±0.037                      | 0.394±0.065    | 2.793x10 <sup>-3</sup>    |
| cg25116269             | 2          | <i>PRORSDIP</i>          | 0.160±0.023                      | 0.089±0.058    | 2.241x10 <sup>-2</sup>    |
| cg01287788             | 2          | <i>SNORD94</i>           | 0.684±0.024                      | 0.776±0.077    | 1.278x10 <sup>-2</sup>    |
| cg13896783             | 2          | <i>PKP4</i>              | 0.443±0.043                      | 0.331±0.086    | 6.176x10 <sup>-3</sup>    |
| cg01779076             | 2          | <i>CFLAR</i>             | 0.376±0.038                      | 0.292±0.044    | 3.465x10 <sup>-4</sup>    |
| cg12198254             | 3          | <i>ATG7</i>              | 0.668±0.026                      | 0.737±0.052    | 6.425x10 <sup>-3</sup>    |
| cg09352908             | 3          | N/A                      | 0.783±0.041                      | 0.895±0.054    | 1.830x10 <sup>-6</sup>    |
| cg13003239             | 3          | <i>WDR6</i>              | 0.453±0.034                      | 0.271±0.136    | 5.926x10 <sup>-4</sup>    |
| cg08081407             | 3          | <i>ARF4</i>              | 0.268±0.027                      | 0.169±0.051    | 9.340x10 <sup>-8</sup>    |
| cg07804735             | 3          | <i>WDR52</i>             | 0.695±0.048                      | 0.806±0.043    | 2.750x10 <sup>-5</sup>    |
| cg10757852             | 3          | <i>RASA2</i>             | 0.535±0.032                      | 0.633±0.072    | 1.209x10 <sup>-3</sup>    |
| cg18185028             | 3          | <i>DHX36</i>             | 0.390±0.044                      | 0.282±0.059    | 5.610x10 <sup>-5</sup>    |
| cg05788437             | 3          | <i>FYTTD1</i>            | 0.142±0.014                      | 0.081±0.051    | 1.142x10 <sup>-2</sup>    |
| cg03150409             | 4          | <i>WHSC1</i>             | 0.637±0.045                      | 0.773±0.093    | 2.625x10 <sup>-4</sup>    |
| cg21843114             | 4          | <i>RBPJ</i>              | 0.440±0.035                      | 0.519±0.054    | 3.863x10 <sup>-3</sup>    |
| cg17404403             | 4          | <i>GARI</i>              | 0.199±0.054                      | 0.090±0.038    | 7.511x10 <sup>-4</sup>    |
| cg14497545             | 4          | <i>MAML3</i>             | 0.538±0.045                      | 0.704±0.096    | 1.210x10 <sup>-6</sup>    |
| cg15285494             | 4          | N/A                      | 0.671±0.029                      | 0.787±0.096    | 8.839x10 <sup>-3</sup>    |
| cg07893230             | 5          | <i>CTNNA1</i>            | 0.290±0.035                      | 0.216±0.041    | 1.051x10 <sup>-3</sup>    |
| cg12152193             | 5          | <i>RNF44</i>             | 0.578±0.053                      | 0.703±0.077    | 4.464x10 <sup>-4</sup>    |
| cg09741240             | 6          | <i>NQO2</i>              | 0.235±0.034                      | 0.118±0.048    | 1.720x10 <sup>-9</sup>    |
| cg14047339             | 6          | <i>SUPT3H</i>            | 0.325±0.023                      | 0.215±0.083    | 6.199x10 <sup>-4</sup>    |
| cg10616859             | 7          | <i>BRATI</i>             | 0.670±0.033                      | 0.743±0.041    | 5.981x10 <sup>-4</sup>    |
| cg11213199             | 7          | <i>MRPS24</i>            | 0.485±0.026                      | 0.408±0.044    | 1.290x10 <sup>-5</sup>    |
| cg04205664             | 7          | <i>CLEC2L</i>            | 0.259±0.108                      | 0.496±0.189    | 4.114x10 <sup>-2</sup>    |
| cg25009327             | 7          | <i>ZNF425</i>            | 0.287±0.060                      | 0.432±0.110    | 8.531x10 <sup>-3</sup>    |
| cg08499057             | 7          | <i>ABCF2</i>             | 0.631±0.044                      | 0.715±0.052    | 1.132x10 <sup>-2</sup>    |
| cg13810766             | 7          | <i>PRKAG2</i>            | 0.458±0.053                      | 0.630±0.101    | 4.080x10 <sup>-6</sup>    |
| cg01994308             | 8          | <i>PLAG1</i>             | 0.301±0.068                      | 0.150±0.089    | 8.452x10 <sup>-4</sup>    |
| cg13560760             | 9          | <i>PMPCA</i>             | 0.563±0.032                      | 0.658±0.051    | 3.080x10 <sup>-6</sup>    |
| cg14495033             | 9          | <i>EHMT1</i>             | 0.654±0.029                      | 0.730±0.062    | 2.190x10 <sup>-2</sup>    |
| cg27435660             | 10         | <i>FBXO18</i>            | 0.577±0.034                      | 0.731±0.051    | 7.501x10 <sup>-3</sup>    |
| cg02732134             | 10         | <i>DNMBP</i>             | 0.677±0.068                      | 0.768±0.112    | 2.830x10 <sup>-5</sup>    |
| cg08206623             | 11         | <i>CDKN1C</i>            | 0.306±0.046                      | 0.156±0.109    | 6.244x10 <sup>-4</sup>    |
| cg18089569             | 11         | N/A                      | 0.229±0.020                      | 0.143±0.067    | 1.859x10 <sup>-3</sup>    |
| cg12375876             | 11         | N/A                      | 0.657±0.037                      | 0.732±0.042    | 1.954x10 <sup>-3</sup>    |
| cg24240077             | 11         | <i>AAMDC</i>             | 0.682±0.023                      | 0.753±0.052    | 1.459x10 <sup>-3</sup>    |
| cg20090957             | 12         | <i>MAPKAPK5</i>          | 0.231±0.030                      | 0.172±0.028    | 3.669x10 <sup>-3</sup>    |

| Target ID <sup>a</sup> | Chromosome | Gene symbol <sup>b</sup> | DNA methylation levels (mean±SD) |                |                           |
|------------------------|------------|--------------------------|----------------------------------|----------------|---------------------------|
|                        |            |                          | NASH-T (n=22)                    | Viral-T (n=37) | P (Welch's <i>t</i> test) |
| cg07449447             | 14         | <i>SAMD4A</i>            | 0.740±0.026                      | 0.804±0.052    | 4.934x10 <sup>-2</sup>    |
| cg03468541             | 14         | <i>ZC3H14</i>            | 0.213±0.038                      | 0.116±0.052    | 2.450x10 <sup>-5</sup>    |
| cg11021810             | 14         | <i>FOXP3</i>             | 0.688±0.029                      | 0.745±0.040    | 4.998x10 <sup>-2</sup>    |
| cg08707819             | 14         | <i>RCOR1</i>             | 0.443±0.037                      | 0.358±0.062    | 9.061x10 <sup>-3</sup>    |
| cg21937244             | 14         | <i>CDC42BPB</i>          | 0.781±0.018                      | 0.845±0.051    | 6.516x10 <sup>-3</sup>    |
| cg00470768             | 15         | <i>INO80</i>             | 0.507±0.050                      | 0.634±0.066    | 1.360x10 <sup>-5</sup>    |
| cg13417485             | 15         | <i>UNC45A</i>            | 0.613±0.038                      | 0.697±0.055    | 3.259x10 <sup>-3</sup>    |
| cg02205746             | 16         | <i>KCTD5</i>             | 0.185±0.042                      | 0.097±0.030    | 2.868x10 <sup>-4</sup>    |
| cg04548722             | 16         | <i>SMIM22</i>            | 0.556±0.030                      | 0.621±0.048    | 2.372x10 <sup>-2</sup>    |
| cg09141413             | 16         | <i>GPRC5B</i>            | 0.273±0.030                      | 0.197±0.051    | 1.044x10 <sup>-3</sup>    |
| cg08213792             | 16         | N/A                      | 0.576±0.032                      | 0.676±0.049    | 2.850x10 <sup>-7</sup>    |
| cg01684248             | 16         | <i>FENDRR</i>            | 0.420±0.049                      | 0.310±0.089    | 4.311x10 <sup>-2</sup>    |
| cg12774921             | 16         | <i>SPG7</i>              | 0.523±0.030                      | 0.605±0.047    | 2.760x10 <sup>-5</sup>    |
| cg03321231             | 17         | <i>RPH3AL</i>            | 0.603±0.047                      | 0.726±0.065    | 1.280x10 <sup>-5</sup>    |
| cg19105961             | 17         | <i>ZZEF1</i>             | 0.431±0.043                      | 0.336±0.071    | 1.651x10 <sup>-2</sup>    |
| cg11855759             | 17         | <i>USP43</i>             | 0.308±0.051                      | 0.192±0.064    | 1.858x10 <sup>-4</sup>    |
| cg07138452             | 17         | <i>FLCN</i>              | 0.280±0.043                      | 0.187±0.053    | 8.615x10 <sup>-4</sup>    |
| cg06361278             | 17         | N/A                      | 0.252±0.044                      | 0.168±0.055    | 1.956x10 <sup>-2</sup>    |
| cg25629442             | 17         | <i>ENGASE</i>            | 0.267±0.043                      | 0.172±0.059    | 1.933x10 <sup>-3</sup>    |
| cg08109808             | 17         | <i>CCDC40</i>            | 0.648±0.036                      | 0.734±0.053    | 4.053x10 <sup>-4</sup>    |
| cg25270498             | 17         | <i>METRNL</i>            | 0.258±0.043                      | 0.152±0.065    | 2.033x10 <sup>-4</sup>    |
| cg06808467             | 18         | <i>LINC00526</i>         | 0.240±0.034                      | 0.141±0.070    | 7.596x10 <sup>-4</sup>    |
| cg25538450             | 19         | <i>REXO1</i>             | 0.219±0.045                      | 0.139±0.040    | 1.733x10 <sup>-2</sup>    |
| cg23084309             | 19         | <i>MLLT1</i>             | 0.276±0.036                      | 0.183±0.055    | 6.920x10 <sup>-5</sup>    |
| cg09112613             | 19         | <i>PRAMI</i>             | 0.685±0.045                      | 0.773±0.062    | 3.560x10 <sup>-2</sup>    |
| cg07783291             | 19         | N/A                      | 0.581±0.045                      | 0.667±0.056    | 2.089x10 <sup>-2</sup>    |
| cg05910615             | 19         | <i>PROSER3</i>           | 0.173±0.044                      | 0.077±0.041    | 1.097x10 <sup>-4</sup>    |
| cg06684987             | 19         | <i>CLASRP</i>            | 0.642±0.021                      | 0.704±0.055    | 4.281x10 <sup>-2</sup>    |
| cg01198024             | 21         | <i>MRAP</i>              | 0.549±0.035                      | 0.631±0.044    | 1.019x10 <sup>-4</sup>    |
| cg17499729             | 21         | <i>CBR3-AS1</i>          | 0.497±0.059                      | 0.636±0.075    | 9.030x10 <sup>-5</sup>    |
| cg11381792             | 21         | <i>TRAPPC10</i>          | 0.240±0.034                      | 0.151±0.045    | 9.370x10 <sup>-6</sup>    |
| cg05998816             | 21         | <i>PCNT</i>              | 0.772±0.045                      | 0.876±0.045    | 3.410x10 <sup>-5</sup>    |
| cg05367846             | 22         | <i>MICAL3</i>            | 0.191±0.032                      | 0.106±0.069    | 2.059x10 <sup>-2</sup>    |
| cg09020181             | 22         | N/A                      | 0.184±0.034                      | 0.115±0.043    | 5.466x10 <sup>-3</sup>    |
| cg25152348             | 22         | <i>NCAPH2</i>            | 0.311±0.048                      | 0.180±0.097    | 2.558x10 <sup>-3</sup>    |

<sup>a</sup>Probe ID of the Infinium HumanMethylation450 BeadChip. <sup>b</sup>National Center for Biotechnology Information (NCBI) database (Genome Build 37). N/A, not annotated (designed in the intergenic regions).
