# Supplementary figures and images for: Genome-wide DNA methylation analysis during non-alcoholic steatohepatitis-related multistage hepatocarcinogenesis: comparison with hepatitis virus-related carcinogenesis
Source: PubMed Central journal article supplement — Carcinogenesis. 2017 Jan 25;38(3):261–70. doi: 10.1093/carcin/bgx005 (PMC5862314; doi:10.1093/carcin/bgx005), 2017-01-25

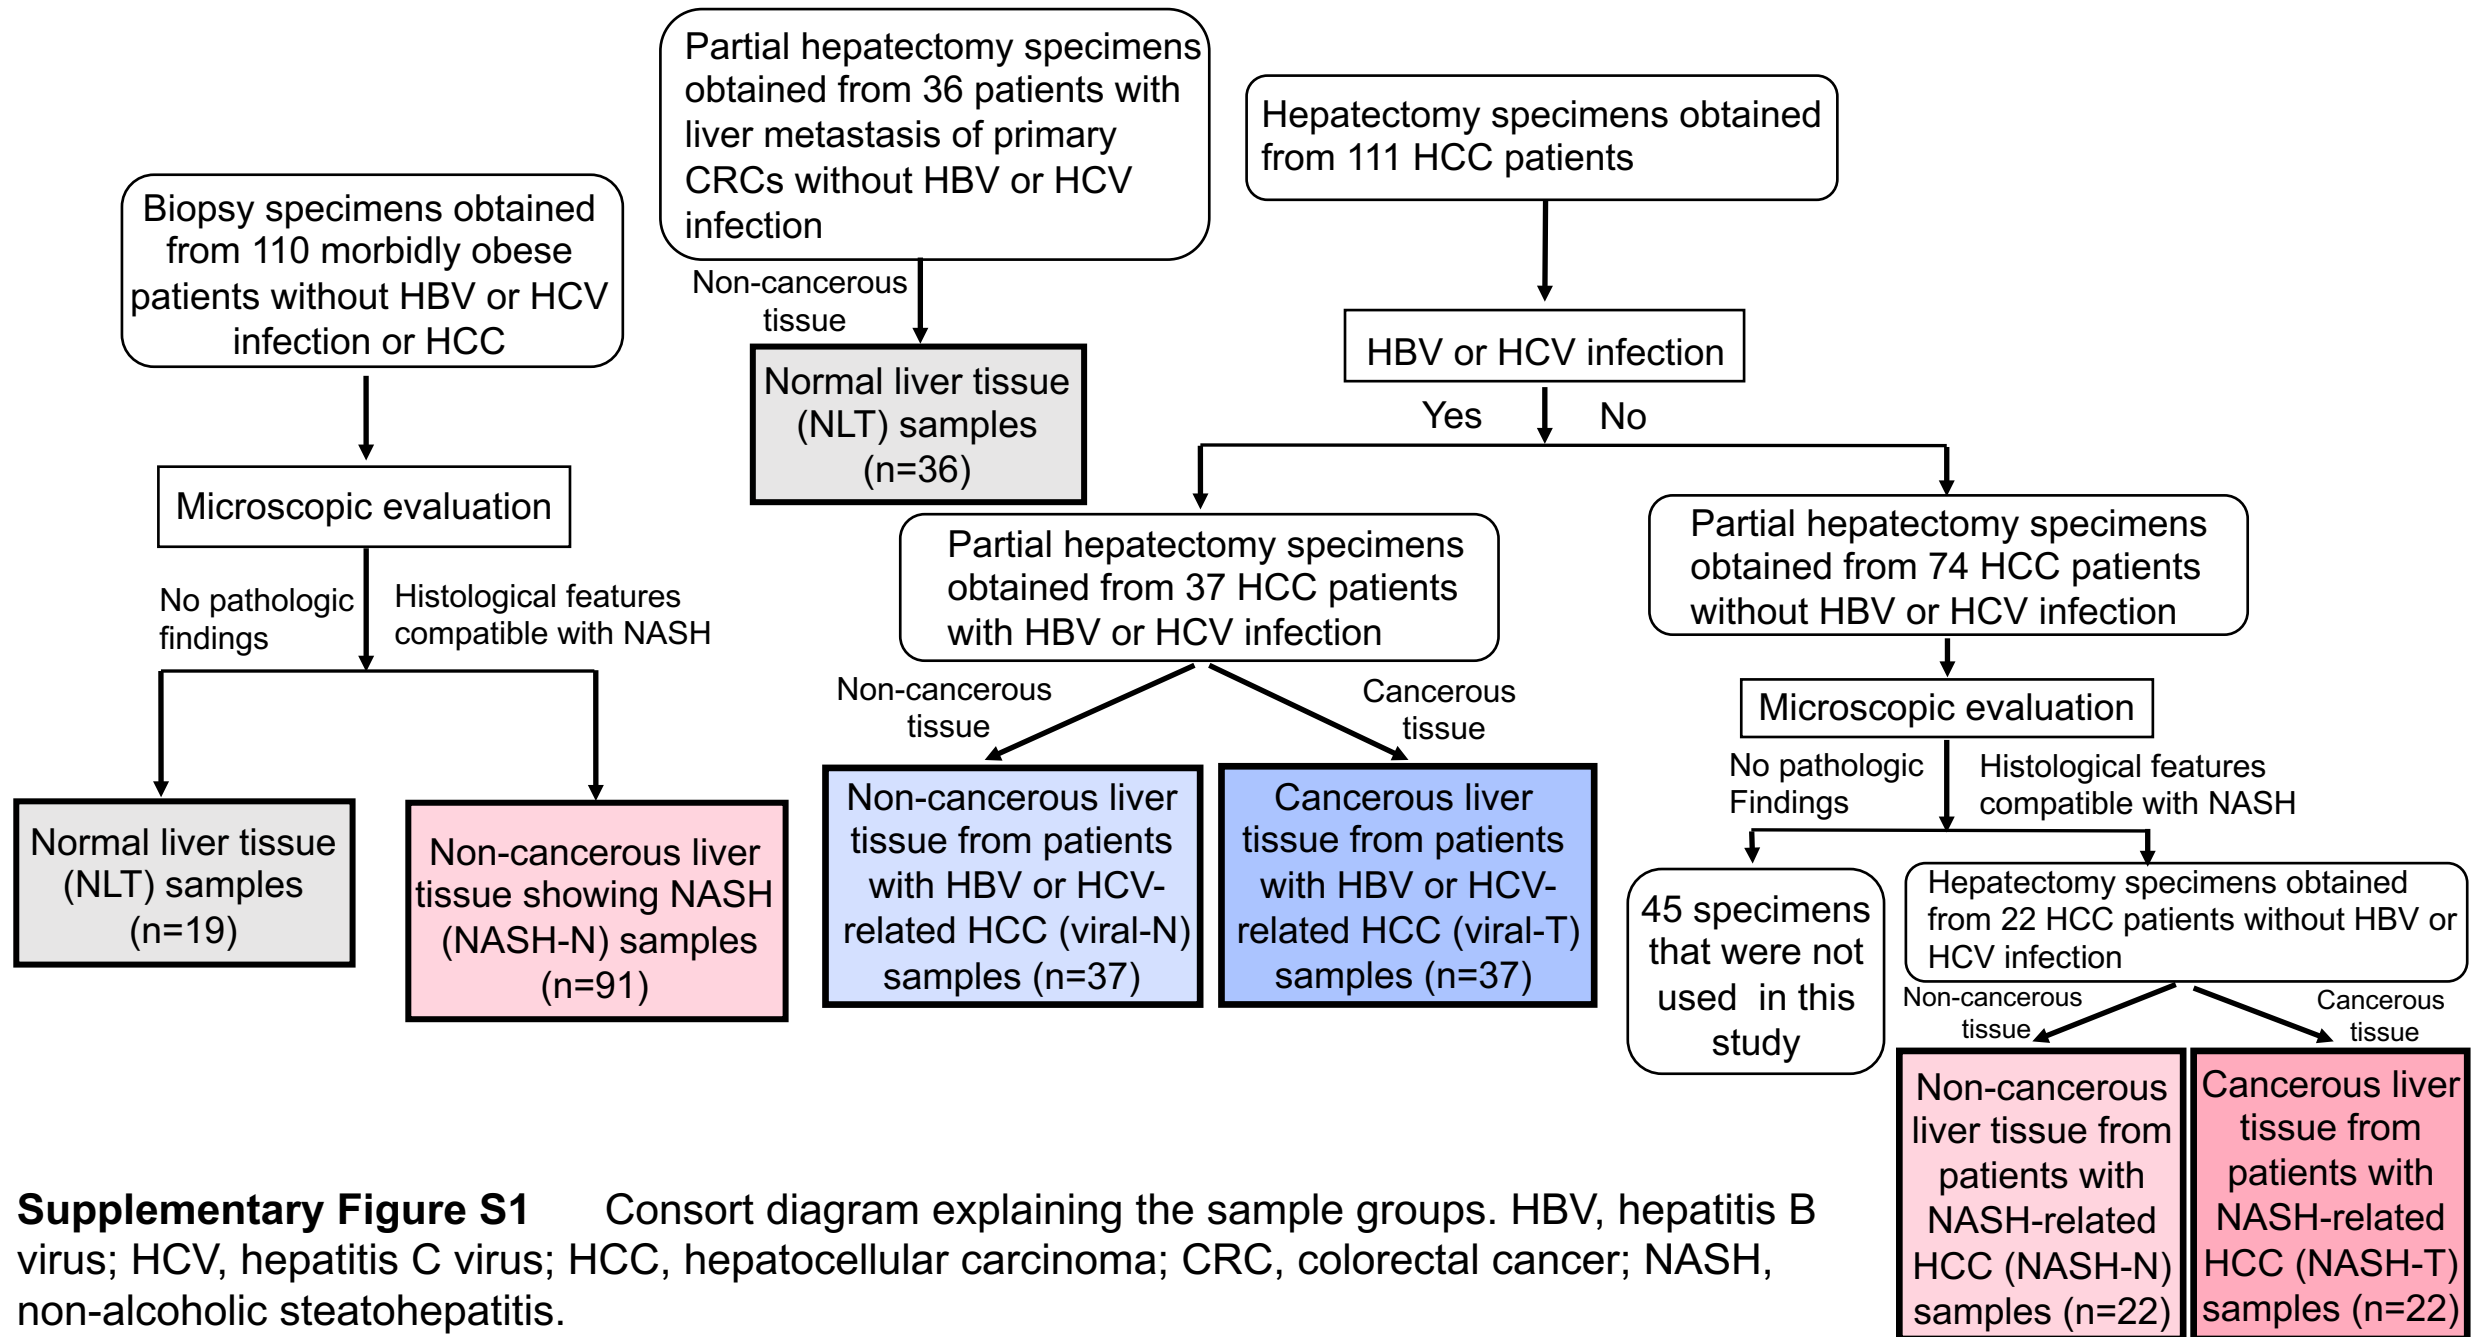

Supplement: bgx005_suppl_kuramoto_supplementary_figure_s1_revised.pdf [file bgx005_suppl_kuramoto_supplementary_figure_s1_revised.pdf]
